# Supplementary material for: How accurate are WorldPop-Global-Unconstrained gridded population data at the cell-level?: A simulation analysis in urban Namibia
Source: PLoS One. 2022 Jul 21;17(7):e0271504. doi: 10.1371/journal.pone.0271504 (PMC9302737; doi:10.1371/journal.pone.0271504)
Supplement: S2 File — (CSV) [file pone.0271504.s004.csv]

uniq_id	lat	long	EA	Consituency	hhsize	sex_head	age_head	fuel	structure	toilet	water	space	any_U5	edu_head	wealth_index	present2016	present2011	present2006	present2001	type2016	type2011	type2006	type2001
1	-22.59620342	17.08902783	60701054	Windhoek East	6	Male	35 - 39	0	0	0	0	0	0	Complete tertiary	1	1	1	1	1	Urban	Urban	Urban	Urban
2	-22.59616543	17.08934441	60701054	Windhoek East	2	Male	45 - 49	0	0	0	0	0	0	Complete secondary	1	1	1	1	1	Urban	Urban	Urban	Urban
3	-22.59606412	17.089623	60701054	Windhoek East	2	Male	25 - 29	0	0	0	0	0	0	Complete tertiary	1	1	1	1	0	Urban	Urban	Urban	Urban
4	-22.59595015	17.0900409	60701054	Windhoek East	3	Female	25 - 29	0	0	0	0	0	0	Complete tertiary	1	1	1	1	1	Urban	Urban	Urban	Urban
5	-22.59584884	17.09131989	60701054	Windhoek East	2	Male	65 - 74	0	0	0	0	0	0	Complete secondary	1	1	1	1	1	Urban	Urban	Urban	Urban
6	-22.59582352	17.09092733	60701054	Windhoek East	3	Male	50 - 54	0	0	0	0	0	0	Complete secondary	1	1	1	1	1	Urban	Urban	Urban	Urban
7	-22.59586151	17.09056009	60701054	Windhoek East	3	Male	50 - 54	0	0	0	0	0	0	Complete tertiary	1	1	1	1	1	Urban	Urban	Urban	Urban
8	-22.59586151	17.09056009	60701054	Windhoek East	7	Male	55 - 59	0	0	0	0	0	0	Complete tertiary	1	1	1	1	1	Urban	Urban	Urban	Urban
9	-22.59545628	17.09112994	60701054	Windhoek East	4	Male	30 - 34	0	0	0	0	0	1	Complete secondary	1	1	1	1	1	Urban	Urban	Urban	Urban
10	-22.59498773	17.09120592	60701054	Windhoek East	1	Female	65 - 74	0	0	0	0	0	0	No formal	1	1	1	1	1	Urban	Urban	Urban	Urban
11	-22.59470914	17.09120592	60701054	Windhoek East	2	Female	55 - 59	0	0	0	0	0	0	Complete secondary	1	1	1	1	1	Urban	Urban	Urban	Urban
12	-22.59449386	17.09119326	60701054	Windhoek East	3	Male	40 - 44	0	0	0	0	0	0	Complete tertiary	1	1	1	1	1	Urban	Urban	Urban	Urban
13	-22.59435457	17.09167447	60701054	Windhoek East	1	Male	55 - 59	0	0	0	0	0	0	Complete tertiary	1	1	1	1	1	Urban	Urban	Urban	Urban
14	-22.59467115	17.09167447	60701054	Windhoek East	2	Male	65 - 74	0	0	0	0	0	0	Complete secondary	1	1	1	1	1	Urban	Urban	Urban	Urban
15	-22.59496241	17.09167447	60701054	Windhoek East	3	Male	45 - 49	0	0	0	0	0	0	No formal	1	1	1	1	1	Urban	Urban	Urban	Urban
16	-22.59543095	17.09169979	60701054	Windhoek East	4	Female	60 - 64	0	0	0	0	0	0	Complete secondary	1	1	1	1	1	Urban	Urban	Urban	Urban
17	-22.59425326	17.08854662	60701054	Windhoek East	2	Male	25 - 29	0	0	0	0	0	0	Complete primary	1	1	1	1	1	Urban	Urban	Urban	Urban
18	-22.59425326	17.08854662	60701054	Windhoek East	2	Female	65 - 74	0	0	0	0	0	0	Complete tertiary	1	1	1	1	0	Urban	Urban	Urban	Urban
19	-22.5942406	17.08873657	60701054	Windhoek East	2	Male	45 - 49	0	0	0	0	0	0	Complete tertiary	1	1	1	1	1	Urban	Urban	Urban	Urban
20	-22.5942406	17.08873657	60701054	Windhoek East	4	Male	65 - 74	0	0	0	0	0	0	Complete primary	1	1	1	0	0	Urban	Urban	Urban	Urban
21	-22.59422793	17.08887587	60701054	Windhoek East	6	Male	40 - 44	0	0	0	0	0	1	Incomplete primary	1	1	1	1	0	Urban	Urban	Urban	Urban
22	-22.5942406	17.08873657	60701054	Windhoek East	1	Male	20 - 24	0	0	0	0	0	0	Complete secondary	1	1	1	0	0	Urban	Urban	Urban	Urban
23	-22.59425326	17.08854662	60701054	Windhoek East	5	Female	25 - 29	0	0	0	0	0	1	Complete tertiary	1	1	1	1	0	Urban	Urban	Urban	Urban
24	-22.5942406	17.08873657	60701054	Windhoek East	1	Male	50 - 54	0	0	0	0	0	0	Complete secondary	1	1	1	1	0	Urban	Urban	Urban	Urban
25	-22.59422793	17.08887587	60701054	Windhoek East	3	Male	45 - 49	0	0	0	0	0	0	Complete tertiary	1	1	1	1	1	Urban	Urban	Urban	Urban
26	-22.59444321	17.08825536	60701054	Windhoek East	4	Male	40 - 44	0	0	0	0	1	1	Complete tertiary	1	1	1	1	0	Urban	Urban	Urban	Urban
27	-22.59444321	17.08825536	60701054	Windhoek East	4	Male	30 - 34	0	0	1	0	0	1	Complete secondary	1	1	1	1	1	Urban	Urban	Urban	Urban
28	-22.59446854	17.08853396	60701054	Windhoek East	1	Female	40 - 44	0	0	0	0	0	0	Complete tertiary	1	1	1	1	0	Urban	Urban	Urban	Urban
29	-22.59446854	17.08853396	60701054	Windhoek East	2	Male	60 - 64	0	0	0	0	0	0	Complete tertiary	1	1	1	1	1	Urban	Urban	Urban	Urban
30	-22.59446854	17.08853396	60701054	Windhoek East	4	Female	50 - 54	0	0	0	0	0	0	Complete primary	1	1	1	1	0	Urban	Urban	Urban	Urban
31	-22.59444321	17.08825536	60701054	Windhoek East	4	Male	35 - 39	0	0	0	0	1	1	Complete tertiary	1	1	1	1	0	Urban	Urban	Urban	Urban
32	-22.59446854	17.08853396	60701054	Windhoek East	6	Male	35 - 39	0	0	0	0	0	0	Complete tertiary	1	1	1	1	1	Urban	Urban	Urban	Urban
33	-22.59467115	17.08823004	60701054	Windhoek East	1	Female	60 - 64	0	0	0	0	0	0	Complete primary	1	1	1	1	0	Urban	Urban	Urban	Urban
34	-22.59470914	17.08804009	60701054	Windhoek East	2	Male	25 - 29	0	0	1	0	0	0	Complete tertiary	1	1	1	1	1	Urban	Urban	Urban	Urban
35	-22.59467115	17.08823004	60701054	Windhoek East	3	Male	50 - 54	0	0	0	0	0	0	Complete tertiary	1	1	1	1	0	Urban	Urban	Urban	Urban
36	-22.59467115	17.08823004	60701054	Windhoek East	4	Male	35 - 39	0	0	0	0	0	0	Complete secondary	1	1	1	1	1	Urban	Urban	Urban	Urban
37	-22.59467115	17.08823004	60701054	Windhoek East	3	Male	30 - 34	0	0	0	0	0	0	Complete tertiary	1	1	1	1	0	Urban	Urban	Urban	Urban
38	-22.59467115	17.08823004	60701054	Windhoek East	4	Male	50 - 54	0	0	0	0	0	0	Complete primary	1	1	1	1	0	Urban	Urban	Urban	Urban
39	-22.59497507	17.08777416	60701054	Windhoek East	5	Male	30 - 34	0	0	0	0	0	1	Complete tertiary	1	1	1	1	0	Urban	Urban	Urban	Urban
40	-22.59497507	17.08777416	60701054	Windhoek East	1	Female	55 - 59	0	0	0	0	0	0	Complete tertiary	1	1	1	1	1	Urban	Urban	Urban	Urban
41	-22.59497507	17.08796411	60701054	Windhoek East	1	Female	40 - 44	0	0	0	0	0	0	Complete secondary	1	1	1	1	0	Urban	Urban	Urban	Urban
42	-22.59497507	17.08796411	60701054	Windhoek East	1	Female	65 - 74	0	0	0	0	0	0	Complete tertiary	1	1	1	1	1	Urban	Urban	Urban	Urban
43	-22.59497507	17.08796411	60701054	Windhoek East	4	Male	30 - 34	0	0	0	0	0	1	Complete secondary	1	1	1	1	0	Urban	Urban	Urban	Urban
44	-22.59497507	17.08777416	60701054	Windhoek East	1	Female	45 - 49	0	0	0	0	0	0	Complete secondary	1	1	1	1	1	Urban	Urban	Urban	Urban
45	-22.59497507	17.08796411	60701054	Windhoek East	7	Male	40 - 44	0	0	1	0	1	0	No formal	1	1	1	0	0	Urban	Urban	Urban	Urban
46	-22.59521567	17.08752089	60701054	Windhoek East	2	Male	60 - 64	0	0	0	0	0	0	Complete tertiary	1	1	1	1	0	Urban	Urban	Urban	Urban
47	-22.59521567	17.08752089	60701054	Windhoek East	1	Male	20 - 24	0	0	0	0	0	0	Complete tertiary	1	1	1	1	0	Urban	Urban	Urban	Urban
48	-22.59521567	17.08766019	60701054	Windhoek East	4	Male	30 - 34	0	0	0	0	0	0	Complete secondary	1	1	1	1	0	Urban	Urban	Urban	Urban
49	-22.59521567	17.08766019	60701054	Windhoek East	1	Female	35 - 39	0	0	0	0	0	0	Complete tertiary	1	1	1	1	1	Urban	Urban	Urban	Urban
50	-22.59521567	17.08766019	60701054	Windhoek East	2	Male	25 - 29	0	0	0	0	0	0	Complete secondary	1	1	1	1	0	Urban	Urban	Urban	Urban
51	-22.59521567	17.08752089	60701054	Windhoek East	1	Female	35 - 39	0	0	0	0	0	0	Complete tertiary	1	1	1	0	0	Urban	Urban	Urban	Urban
52	-22.59521567	17.08766019	60701054	Windhoek East	4	Male	50 - 54	0	0	0	0	0	0	Complete tertiary	1	1	1	1	0	Urban	Urban	Urban	Urban
53	-22.59549427	17.08719164	60701054	Windhoek East	2	Male	50 - 54	0	0	0	0	0	0	Complete secondary	1	1	1	1	1	Urban	Urban	Urban	Urban
54	-22.59549427	17.08719164	60701054	Windhoek East	4	Male	35 - 39	0	0	0	0	0	0	Complete secondary	1	1	1	1	0	Urban	Urban	Urban	Urban
55	-22.59549427	17.08744491	60701054	Windhoek East	1	Female	40 - 44	0	0	0	0	0	0	Complete tertiary	1	1	1	1	1	Urban	Urban	Urban	Urban
56	-22.59549427	17.08744491	60701054	Windhoek East	1	Female	75+	0	0	0	0	0	0	Complete secondary	1	1	1	1	0	Urban	Urban	Urban	Urban
57	-22.59549427	17.08744491	60701054	Windhoek East	1	Male	55 - 59	0	0	0	0	0	0	Complete secondary	1	1	1	1	1	Urban	Urban	Urban	Urban
58	-22.59549427	17.08744491	60701054	Windhoek East	1	Male	25 - 29	0	0	0	0	0	0	Complete secondary	1	1	1	1	0	Urban	Urban	Urban	Urban
59	-22.59543095	17.08730561	60701054	Windhoek East	3	Male	30 - 34	0	0	0	0	0	1	Complete secondary	1	1	1	1	0	Urban	Urban	Urban	Urban
60	-22.59535497	17.08749556	60701054	Windhoek East	3	Male	45 - 49	0	0	0	0	0	0	Complete secondary	1	1	1	1	1	Urban	Urban	Urban	Urban
61	-22.52279292	17.06805197	60401011	Khomasdal North	3	Male	20 - 24	0	0	0	0	0	0	Complete primary	1	1	1	1	1	Urban	Urban	Urban	Urban
62	-22.5228933	17.0680414	60401011	Khomasdal North	7	Male	45 - 49	0	0	0	0	0	0	Incomplete primary	1	1	1	1	1	Urban	Urban	Urban	Urban
63	-22.52300424	17.06802555	60401011	Khomasdal North	13	Male	50 - 54	0	0	0	0	0	1	Incomplete primary	1	1	1	1	0	Urban	Urban	Urban	Urban
64	-22.52309405	17.06798857	60401011	Khomasdal North	7	Female	75+	0	0	1	0	1	1	Incomplete primary	1	1	1	1	1	Urban	Urban	Urban	Urban
65	-22.52319971	17.06796744	60401011	Khomasdal North	3	Male	35 - 39	0	0	0	0	0	0	Complete tertiary	1	1	1	1	1	Urban	Urban	Urban	Urban
66	-22.52334763	17.06796216	60401011	Khomasdal North	2	Male	35 - 39	0	0	1	0	0	0	Complete tertiary	1	1	1	1	1	Urban	Urban	Urban	Urban
67	-22.52344801	17.06794103	60401011	Khomasdal North	11	Female	30 - 34	0	0	0	0	0	1	Complete tertiary	1	1	1	1	0	Urban	Urban	Urban	Urban
68	-22.52353782	17.06799386	60401011	Khomasdal North	6	Male	50 - 54	0	0	0	0	0	0	Complete secondary	1	1	1	1	1	Urban	Urban	Urban	Urban
69	-22.52361178	17.06790933	60401011	Khomasdal North	6	Male	30 - 34	0	0	0	0	0	0	Complete secondary	1	1	1	1	1	Urban	Urban	Urban	Urban
70	-22.52372272	17.0678882	60401011	Khomasdal North	1	Male	40 - 44	0	0	1	0	0	0	Complete primary	1	1	1	1	1	Urban	Urban	Urban	Urban
71	-22.5238231	17.0678565	60401011	Khomasdal North	3	Male	45 - 49	0	0	0	0	0	1	Incomplete primary	1	1	1	1	1	Urban	Urban	Urban	Urban
72	-22.52390762	17.06784593	60401011	Khomasdal North	1	Male	25 - 29	0	0	0	0	0	0	Complete tertiary	1	1	1	1	1	Urban	Urban	Urban	Urban
73	-22.52402913	17.06783537	60401011	Khomasdal North	4	Female	35 - 39	1	0	0	0	0	0	Complete secondary	1	1	1	1	1	Urban	Urban	Urban	Urban
74	-22.52369102	17.06813121	60401011	Khomasdal North	4	Male	30 - 34	0	0	1	0	0	1	Complete primary	1	1	1	1	1	Urban	Urban	Urban	Urban
75	-22.52381781	17.06819461	60401011	Khomasdal North	4	Male	40 - 44	0	0	0	0	0	0	Complete tertiary	1	1	1	1	1	Urban	Urban	Urban	Urban
76	-22.52392347	17.06823159	60401011	Khomasdal North	4	Male	30 - 34	0	0	0	0	0	1	Complete primary	1	1	1	1	1	Urban	Urban	Urban	Urban
77	-22.52405026	17.06829498	60401011	Khomasdal North	2	Male	65 - 74	0	0	0	0	0	0	Complete primary	1	1	1	1	1	Urban	Urban	Urban	Urban
78	-22.52411366	17.06836366	60401011	Khomasdal North	1	Male	50 - 54	0	0	0	0	0	0	Complete primary	1	1	1	1	1	Urban	Urban	Urban	Urban
79	-22.52421932	17.06839008	60401011	Khomasdal North	5	Male	50 - 54	0	0	0	0	0	1	Complete primary	1	1	1	1	1	Urban	Urban	Urban	Urban
80	-22.52432497	17.06846404	60401011	Khomasdal North	4	Female	35 - 39	0	0	1	0	1	1	Complete secondary	1	1	1	1	1	Urban	Urban	Urban	Urban
81	-22.52444648	17.0684746	60401011	Khomasdal North	1	Male	40 - 44	0	0	1	0	0	0	Complete primary	1	1	1	1	0	Urban	Urban	Urban	Urban
82	-22.52442007	17.06828442	60401011	Khomasdal North	6	Male	30 - 34	0	0	0	0	0	0	Incomplete primary	1	1	1	1	0	Urban	Urban	Urban	Urban
83	-22.52428271	17.06819461	60401011	Khomasdal North	2	Female	35 - 39	0	1	0	0	0	0	No formal	1	1	1	1	1	Urban	Urban	Urban	Urban
84	-22.52420347	17.06815234	60401011	Khomasdal North	2	Female	45 - 49	0	0	0	0	0	0	Complete primary	1	1	1	1	1	Urban	Urban	Urban	Urban
85	-22.52411894	17.06807838	60401011	Khomasdal North	8	Male	40 - 44	0	0	0	0	1	0	Incomplete primary	1	1	1	1	1	Urban	Urban	Urban	Urban
86	-22.52359065	17.06811536	60401011	Khomasdal North	4	Male	30 - 34	0	1	1	0	1	1	Complete primary	1	1	1	1	1	Urban	Urban	Urban	Urban
87	-22.52340574	17.06819461	60401011	Khomasdal North	8	Male	40 - 44	0	0	0	0	0	1	Complete secondary	1	1	1	1	1	Urban	Urban	Urban	Urban
88	-22.52330008	17.06821046	60401011	Khomasdal North	7	Male	55 - 59	0	0	0	0	0	0	Complete secondary	1	1	1	1	1	Urban	Urban	Urban	Urban
89	-22.5231416	17.06821046	60401011	Khomasdal North	3	Male	50 - 54	1	0	0	0	0	0	Complete secondary	1	1	1	1	1	Urban	Urban	Urban	Urban
90	-22.52305707	17.06822102	60401011	Khomasdal North	2	Male	25 - 29	0	0	1	0	0	0	Complete primary	1	1	1	1	1	Urban	Urban	Urban	Urban
91	-22.52300424	17.06823687	60401011	Khomasdal North	4	Male	60 - 64	0	1	0	0	0	0	Complete primary	1	1	1	1	1	Urban	Urban	Urban	Urban
92	-22.52291971	17.06825272	60401011	Khomasdal North	5	Female	30 - 34	0	0	0	0	1	1	Complete secondary	1	1	1	1	1	Urban	Urban	Urban	Urban
93	-22.52282462	17.06819461	60401011	Khomasdal North	4	Male	25 - 29	0	0	0	0	0	0	Complete tertiary	1	1	1	1	1	Urban	Urban	Urban	Urban
94	-22.5228299	17.06845876	60401011	Khomasdal North	9	Female	35 - 39	0	0	0	0	0	0	Complete primary	1	1	1	1	1	Urban	Urban	Urban	Urban
95	-22.52293556	17.0684746	60401011	Khomasdal North	7	Female	35 - 39	0	0	0	0	0	1	Complete tertiary	1	1	1	1	1	Urban	Urban	Urban	Urban
96	-22.52305707	17.0684746	60401011	Khomasdal North	2	Male	35 - 39	0	0	0	0	0	0	Complete tertiary	1	1	1	1	1	Urban	Urban	Urban	Urban
97	-22.52317858	17.06846404	60401011	Khomasdal North	8	Male	35 - 39	0	0	1	0	0	1	Complete secondary	1	1	1	1	1	Urban	Urban	Urban	Urban
98	-22.52326839	17.06842706	60401011	Khomasdal North	4	Female	40 - 44	0	0	0	0	0	1	Incomplete primary	1	1	1	1	1	Urban	Urban	Urban	Urban
99	-22.5233582	17.06842706	60401011	Khomasdal North	7	Male	45 - 49	0	0	0	0	1	1	Incomplete primary	1	1	1	1	1	Urban	Urban	Urban	Urban
100	-22.52350084	17.06841121	60401011	Khomasdal North	5	Male	55 - 59	0	1	0	0	1	0	Complete primary	1	1	1	1	0	Urban	Urban	Urban	Urban
101	-22.52362763	17.06839008	60401011	Khomasdal North	2	Female	35 - 39	0	0	1	0	0	0	Complete secondary	1	1	1	1	1	Urban	Urban	Urban	Urban
102	-22.52374385	17.06845876	60401011	Khomasdal North	7	Female	25 - 29	0	0	0	0	1	1	Complete tertiary	1	1	1	0	0	Urban	Urban	Urban	Urban
103	-22.52386536	17.068538	60401011	Khomasdal North	2	Male	30 - 34	0	0	0	0	0	0	Complete tertiary	1	1	1	1	1	Urban	Urban	Urban	Urban
104	-22.52396573	17.06857498	60401011	Khomasdal North	6	Male	45 - 49	0	0	1	0	1	0	Complete primary	1	1	1	1	1	Urban	Urban	Urban	Urban
105	-22.52406611	17.06863309	60401011	Khomasdal North	7	Female	65 - 74	0	0	0	0	0	0	Complete primary	1	1	1	1	1	Urban	Urban	Urban	Urban
106	-22.5241612	17.06867536	60401011	Khomasdal North	4	Male	40 - 44	0	0	0	0	0	0	Complete primary	1	1	1	1	1	Urban	Urban	Urban	Urban
107	-22.52427743	17.0687229	60401011	Khomasdal North	2	Female	50 - 54	0	0	0	0	0	0	Complete primary	1	1	1	1	1	Urban	Urban	Urban	Urban
108	-22.5244412	17.06877573	60401011	Khomasdal North	2	Female	45 - 49	0	0	0	0	0	0	Complete primary	1	1	1	1	1	Urban	Urban	Urban	Urban
109	-22.52454686	17.06871234	60401011	Khomasdal North	7	Male	55 - 59	0	0	0	0	0	0	Complete secondary	1	1	1	1	1	Urban	Urban	Urban	Urban
110	-22.52461554	17.06889196	60401011	Khomasdal North	3	Male	30 - 34	0	0	0	0	0	1	Complete secondary	1	1	1	1	1	Urban	Urban	Urban	Urban
111	-22.52452044	17.06895535	60401011	Khomasdal North	1	Female	20 - 24	0	0	1	0	0	0	Complete secondary	1	1	1	1	1	Urban	Urban	Urban	Urban
112	-22.52442007	17.06899233	60401011	Khomasdal North	2	Male	45 - 49	0	0	0	0	0	0	Complete primary	1	1	1	1	1	Urban	Urban	Urban	Urban
113	-22.52430384	17.06899761	60401011	Khomasdal North	4	Male	50 - 54	0	0	0	0	0	0	Complete secondary	1	1	1	1	1	Urban	Urban	Urban	Urban
114	-22.52415592	17.06896592	60401011	Khomasdal North	9	Male	50 - 54	0	0	0	0	0	1	Complete secondary	1	1	1	1	1	Urban	Urban	Urban	Urban
115	-22.52406611	17.06892894	60401011	Khomasdal North	7	Male	40 - 44	0	0	0	0	1	0	Complete tertiary	1	1	1	1	1	Urban	Urban	Urban	Urban
116	-22.52396045	17.06884441	60401011	Khomasdal North	6	Male	60 - 64	0	0	0	0	1	1	Complete secondary	1	1	1	1	1	Urban	Urban	Urban	Urban
117	-22.52387064	17.06879158	60401011	Khomasdal North	1	Male	25 - 29	0	0	1	0	0	0	Complete primary	1	1	1	1	1	Urban	Urban	Urban	Urban
118	-22.52373857	17.06871234	60401011	Khomasdal North	5	Female	45 - 49	0	0	0	0	0	1	Complete primary	1	1	1	1	1	Urban	Urban	Urban	Urban
119	-22.52369102	17.06865951	60401011	Khomasdal North	6	Male	45 - 49	0	1	0	0	1	1	Complete secondary	1	1	1	1	1	Urban	Urban	Urban	Urban
120	-22.52356423	17.06860139	60401011	Khomasdal North	1	Female	40 - 44	0	0	0	0	0	0	Complete tertiary	1	1	1	1	0	Urban	Urban	Urban	Urban
121	-22.52362234	17.06855913	60401011	Khomasdal North	4	Male	30 - 34	0	0	0	0	1	0	No formal	1	1	1	1	1	Urban	Urban	Urban	Urban
122	-22.52344801	17.06862781	60401011	Khomasdal North	4	Male	40 - 44	0	0	0	0	0	0	Complete primary	1	1	1	1	1	Urban	Urban	Urban	Urban
123	-22.52337405	17.06865422	60401011	Khomasdal North	1	Male	45 - 49	0	0	0	0	0	0	Complete tertiary	1	1	1	0	0	Urban	Urban	Urban	Urban
124	-22.52324726	17.06867536	60401011	Khomasdal North	5	Female	40 - 44	0	1	1	0	1	1	Complete secondary	1	1	1	1	1	Urban	Urban	Urban	Urban
125	-22.5231099	17.06867007	60401011	Khomasdal North	2	Female	30 - 34	0	0	1	0	0	1	Complete primary	1	1	1	1	1	Urban	Urban	Urban	Urban
126	-22.52300952	17.06868592	60401011	Khomasdal North	5	Male	40 - 44	0	0	0	0	0	1	Complete primary	1	1	1	1	1	Urban	Urban	Urban	Urban
127	-22.52290915	17.06869649	60401011	Khomasdal North	7	Female	35 - 39	0	0	0	0	1	0	Complete primary	1	1	1	1	1	Urban	Urban	Urban	Urban
128	-22.52289858	17.06897648	60401011	Khomasdal North	7	Female	35 - 39	0	0	0	0	0	1	Complete tertiary	1	1	1	1	1	Urban	Urban	Urban	Urban
129	-22.52300952	17.06898705	60401011	Khomasdal North	5	Female	55 - 59	0	0	0	0	0	0	No formal	1	1	1	1	1	Urban	Urban	Urban	Urban
130	-22.52315216	17.06896592	60401011	Khomasdal North	9	Male	35 - 39	0	0	0	0	0	0	Complete secondary	1	1	1	1	1	Urban	Urban	Urban	Urban
131	-22.52326839	17.06896592	60401011	Khomasdal North	8	Male	35 - 39	0	0	0	0	0	1	Complete primary	1	1	1	1	1	Urban	Urban	Urban	Urban
132	-22.52338989	17.06896592	60401011	Khomasdal North	4	Male	35 - 39	0	0	0	0	0	0	Complete secondary	1	1	1	1	1	Urban	Urban	Urban	Urban
133	-22.52349027	17.06890252	60401011	Khomasdal North	2	Male	20 - 24	0	0	0	0	0	0	Complete secondary	1	1	1	1	1	Urban	Urban	Urban	Urban
134	-22.52362763	17.0689712	60401011	Khomasdal North	15	Male	50 - 54	0	0	0	0	0	1	No formal	1	1	1	1	1	Urban	Urban	Urban	Urban
135	-22.52373329	17.06901875	60401011	Khomasdal North	3	Female	40 - 44	0	0	0	0	0	0	Complete primary	1	1	1	1	1	Urban	Urban	Urban	Urban
136	-22.52384423	17.06905573	60401011	Khomasdal North	7	Male	35 - 39	0	0	0	0	0	1	Complete secondary	1	1	1	1	1	Urban	Urban	Urban	Urban
137	-22.52393932	17.06912969	60401011	Khomasdal North	4	Male	25 - 29	0	0	0	0	0	0	Complete primary	1	1	1	1	1	Urban	Urban	Urban	Urban
138	-22.52407139	17.0691878	60401011	Khomasdal North	4	Male	35 - 39	0	0	1	0	0	1	Incomplete primary	1	1	1	0	0	Urban	Urban	Urban	Urban
139	-22.5241612	17.06924591	60401011	Khomasdal North	2	Male	40 - 44	0	0	0	0	0	0	Complete secondary	1	1	1	1	1	Urban	Urban	Urban	Urban
140	-22.52427743	17.06928818	60401011	Khomasdal North	8	Male	30 - 34	0	0	0	0	0	1	Complete tertiary	1	1	1	1	1	Urban	Urban	Urban	Urban
141	-22.52427214	17.06956289	60401011	Khomasdal North	8	Female	40 - 44	0	0	0	0	1	0	Complete primary	1	1	1	1	1	Urban	Urban	Urban	Urban
142	-22.52416649	17.06950478	60401011	Khomasdal North	2	Female	50 - 54	0	1	0	0	0	0	Complete primary	1	1	1	1	1	Urban	Urban	Urban	Urban
143	-22.52408196	17.06947308	60401011	Khomasdal North	2	Male	30 - 34	0	0	0	0	0	0	Complete primary	1	1	1	1	1	Urban	Urban	Urban	Urban
144	-22.524008	17.06941497	60401011	Khomasdal North	1	Male	25 - 29	0	0	0	0	0	0	Complete secondary	1	1	1	1	1	Urban	Urban	Urban	Urban
145	-22.52388649	17.06934101	60401011	Khomasdal North	5	Female	35 - 39	0	0	0	0	0	1	Complete secondary	1	1	1	1	0	Urban	Urban	Urban	Urban
146	-22.52374913	17.06925648	60401011	Khomasdal North	3	Female	40 - 44	0	0	0	0	0	0	Complete primary	1	1	1	1	1	Urban	Urban	Urban	Urban
147	-22.52363819	17.0691878	60401011	Khomasdal North	10	Female	45 - 49	0	0	0	0	1	0	Complete primary	1	1	1	1	1	Urban	Urban	Urban	Urban
148	-22.52353782	17.06912969	60401011	Khomasdal North	4	Male	35 - 39	0	1	0	0	1	0	Complete secondary	1	1	1	1	1	Urban	Urban	Urban	Urban
149	-22.52342159	17.06914025	60401011	Khomasdal North	5	Female	45 - 49	0	0	0	0	0	1	Complete secondary	1	1	1	1	1	Urban	Urban	Urban	Urban
150	-22.52330537	17.06915082	60401011	Khomasdal North	2	Male	20 - 24	0	1	0	0	0	0	Complete primary	1	1	1	1	1	Urban	Urban	Urban	Urban
151	-22.52321556	17.0691878	60401011	Khomasdal North	7	Male	55 - 59	0	0	0	0	1	0	Complete tertiary	1	1	1	1	1	Urban	Urban	Urban	Urban
152	-22.52307292	17.06917723	60401011	Khomasdal North	2	Male	45 - 49	0	0	0	0	0	0	Complete secondary	1	1	1	1	1	Urban	Urban	Urban	Urban
153	-22.52299367	17.06919308	60401011	Khomasdal North	6	Male	35 - 39	0	1	0	0	0	1	No formal	1	1	1	1	1	Urban	Urban	Urban	Urban
154	-22.52340574	17.06947836	60401011	Khomasdal North	7	Male	45 - 49	0	0	0	0	0	1	Incomplete primary	1	1	1	1	1	Urban	Urban	Urban	Urban
155	-22.52355367	17.06951006	60401011	Khomasdal North	6	Male	50 - 54	0	0	0	0	0	1	Complete secondary	1	1	1	1	1	Urban	Urban	Urban	Urban
156	-22.52364348	17.06955761	60401011	Khomasdal North	1	Male	30 - 34	0	0	0	0	0	0	Complete secondary	1	1	1	1	0	Urban	Urban	Urban	Urban
157	-22.52373857	17.06961044	60401011	Khomasdal North	2	Male	20 - 24	0	0	0	0	0	0	Complete secondary	1	1	1	1	1	Urban	Urban	Urban	Urban
158	-22.52382838	17.0696844	60401011	Khomasdal North	4	Male	35 - 39	0	0	0	0	0	0	Complete secondary	1	1	1	1	1	Urban	Urban	Urban	Urban
159	-22.5239446	17.06974251	60401011	Khomasdal North	18	Female	50 - 54	0	0	0	0	1	1	Incomplete primary	1	1	1	1	1	Urban	Urban	Urban	Urban
160	-22.52403441	17.06979006	60401011	Khomasdal North	1	Female	40 - 44	0	0	0	0	0	0	Complete primary	1	1	1	1	1	Urban	Urban	Urban	Urban
161	-22.52412422	17.06985873	60401011	Khomasdal North	6	Female	50 - 54	0	0	1	0	0	1	Incomplete primary	1	1	1	1	1	Urban	Urban	Urban	Urban
162	-22.52426686	17.06987987	60401011	Khomasdal North	7	Male	35 - 39	0	0	0	0	0	1	Complete primary	1	1	1	1	1	Urban	Urban	Urban	Urban
163	-22.52435139	17.06986402	60401011	Khomasdal North	3	Male	40 - 44	0	0	0	0	0	0	Complete tertiary	1	1	1	1	1	Urban	Urban	Urban	Urban
164	-22.52447818	17.06982175	60401011	Khomasdal North	1	Male	35 - 39	0	0	1	0	0	0	Complete primary	1	1	1	1	1	Urban	Urban	Urban	Urban
165	-22.52441478	17.06952591	60401011	Khomasdal North	1	Female	20 - 24	0	0	1	0	0	0	Complete primary	1	1	1	1	1	Urban	Urban	Urban	Urban
166	-22.52452044	17.06953647	60401011	Khomasdal North	4	Male	60 - 64	0	0	0	0	0	0	Complete primary	1	1	1	1	1	Urban	Urban	Urban	Urban
167	-22.5246261	17.06945723	60401011	Khomasdal North	4	Male	35 - 39	0	0	0	0	0	0	Complete secondary	1	1	1	1	0	Urban	Urban	Urban	Urban
168	-22.52476346	17.06920893	60401011	Khomasdal North	7	Male	50 - 54	0	0	1	0	1	1	Complete secondary	1	1	1	1	1	Urban	Urban	Urban	Urban
169	-22.52466837	17.06920893	60401011	Khomasdal North	5	Male	60 - 64	0	0	0	0	1	0	Complete primary	1	1	1	1	1	Urban	Urban	Urban	Urban
170	-22.52458384	17.06926704	60401011	Khomasdal North	6	Female	50 - 54	0	0	0	0	0	1	Complete primary	1	1	1	1	1	Urban	Urban	Urban	Urban
171	-22.52444648	17.06934629	60401011	Khomasdal North	3	Female	45 - 49	0	0	0	0	0	0	Complete primary	1	1	1	1	1	Urban	Urban	Urban	Urban
172	-22.5246578	17.06982175	60401012	Khomasdal North	1	Male	30 - 34	0	0	0	0	0	0	Complete primary	1	1	1	1	1	Urban	Urban	Urban	Urban
173	-22.52475289	17.0698693	60401012	Khomasdal North	2	Female	25 - 29	0	0	0	0	0	0	Complete tertiary	1	1	1	1	1	Urban	Urban	Urban	Urban
174	-22.52479516	17.06975836	60401012	Khomasdal North	5	Male	40 - 44	0	0	0	0	1	1	Complete primary	1	1	1	1	0	Urban	Urban	Urban	Urban
175	-22.52486912	17.06970025	60401012	Khomasdal North	5	Male	45 - 49	0	0	0	0	0	0	Complete tertiary	1	1	1	1	1	Urban	Urban	Urban	Urban
176	-22.52494308	17.06960515	60401012	Khomasdal North	2	Female	25 - 29	0	0	0	0	0	1	Complete tertiary	1	1	1	1	1	Urban	Urban	Urban	Urban
177	-22.52501704	17.06952591	60401012	Khomasdal North	5	Female	35 - 39	0	0	0	0	0	1	Complete primary	1	1	1	1	1	Urban	Urban	Urban	Urban
178	-22.52516496	17.06935157	60401012	Khomasdal North	2	Male	20 - 24	0	0	1	0	0	0	No formal	1	1	1	1	1	Urban	Urban	Urban	Urban
179	-22.52511213	17.06922478	60401012	Khomasdal North	2	Female	30 - 34	0	0	0	0	0	0	Complete secondary	1	1	1	1	1	Urban	Urban	Urban	Urban
180	-22.52507515	17.06907686	60401012	Khomasdal North	6	Male	50 - 54	0	0	1	0	0	0	Incomplete primary	1	1	1	1	1	Urban	Urban	Urban	Urban
181	-22.52498006	17.0690029	60401012	Khomasdal North	1	Male	60 - 64	0	0	0	0	0	0	Complete secondary	1	1	1	1	1	Urban	Urban	Urban	Urban
182	-22.52496949	17.06886026	60401012	Khomasdal North	1	Female	20 - 24	0	0	0	0	0	0	Incomplete primary	1	1	1	1	1	Urban	Urban	Urban	Urban
183	-22.52494308	17.06868064	60401012	Khomasdal North	4	Male	30 - 34	0	0	0	0	1	0	Complete tertiary	1	1	1	1	1	Urban	Urban	Urban	Urban
184	-22.52491138	17.06852215	60401012	Khomasdal North	8	Female	40 - 44	0	0	0	0	0	0	Complete primary	1	1	1	1	1	Urban	Urban	Urban	Urban
185	-22.52476346	17.06841649	60401012	Khomasdal North	1	Male	30 - 34	0	0	1	0	0	0	Complete tertiary	1	1	1	1	1	Urban	Urban	Urban	Urban
186	-22.52468421	17.06826329	60401012	Khomasdal North	3	Male	75+	0	0	0	0	0	0	Complete secondary	1	1	1	1	1	Urban	Urban	Urban	Urban
187	-22.52466837	17.06814178	60401012	Khomasdal North	3	Female	35 - 39	0	0	1	0	0	0	Incomplete primary	1	1	1	1	1	Urban	Urban	Urban	Urban
188	-22.52466837	17.06792518	60401012	Khomasdal North	4	Male	25 - 29	0	0	0	0	0	1	Complete primary	1	1	1	1	1	Urban	Urban	Urban	Urban
189	-22.52453629	17.06775084	60401012	Khomasdal North	7	Female	50 - 54	0	0	0	0	0	0	Incomplete primary	1	1	1	1	0	Urban	Urban	Urban	Urban
190	-22.52442535	17.06776141	60401012	Khomasdal North	8	Male	75+	0	0	0	0	0	1	Incomplete primary	1	1	1	1	1	Urban	Urban	Urban	Urban
191	-22.52429328	17.06780367	60401012	Khomasdal North	4	Male	45 - 49	0	0	0	0	0	1	Complete secondary	1	1	1	1	1	Urban	Urban	Urban	Urban
192	-22.52451516	17.06800442	60401012	Khomasdal North	4	Male	40 - 44	0	0	0	0	0	0	Complete primary	1	1	1	1	0	Urban	Urban	Urban	Urban
193	-22.53216485	17.06828442	60401012	Khomasdal North	2	Female	20 - 24	0	0	1	0	0	0	Complete secondary	1	1	1	1	1	Urban	Urban	Urban	Urban
194	-22.5321807	17.06812065	60401012	Khomasdal North	5	Female	35 - 39	0	0	0	0	0	1	No formal	1	1	1	1	1	Urban	Urban	Urban	Urban
195	-22.52892113	17.06703765	60401012	Khomasdal North	1	Male	25 - 29	0	0	0	0	0	0	Complete secondary	1	1	1	1	1	Urban	Urban	Urban	Urban
196	-22.52892641	17.06713802	60401012	Khomasdal North	4	Male	35 - 39	0	0	0	0	0	1	Complete primary	1	1	1	1	1	Urban	Urban	Urban	Urban
197	-22.52893169	17.06724368	60401012	Khomasdal North	4	Male	40 - 44	0	1	0	0	0	1	Complete secondary	1	1	1	1	1	Urban	Urban	Urban	Urban
198	-22.52875207	17.06737575	60401012	Khomasdal North	4	Male	35 - 39	0	0	0	0	0	1	Complete secondary	1	1	1	1	1	Urban	Urban	Urban	Urban
199	-22.52886302	17.06746028	60401012	Khomasdal North	2	Male	65 - 74	0	0	1	0	0	0	Complete tertiary	1	1	1	1	1	Urban	Urban	Urban	Urban
200	-22.52892113	17.06750783	60401012	Khomasdal North	5	Female	20 - 24	0	0	0	0	1	1	Complete secondary	1	1	1	1	1	Urban	Urban	Urban	Urban
201	-22.52901094	17.06741273	60401012	Khomasdal North	2	Female	25 - 29	0	0	0	0	0	0	Complete primary	1	1	1	1	1	Urban	Urban	Urban	Urban
202	-22.52909547	17.06729123	60401012	Khomasdal North	8	Male	30 - 34	0	0	1	0	0	1	Complete tertiary	1	1	1	1	1	Urban	Urban	Urban	Urban
203	-22.52893698	17.06732821	60401012	Khomasdal North	7	Female	65 - 74	0	0	0	0	0	1	Complete secondary	1	1	1	1	1	Urban	Urban	Urban	Urban
204	-22.52892113	17.06739689	60401012	Khomasdal North	4	Male	45 - 49	0	0	0	0	0	0	Complete primary	1	1	1	1	1	Urban	Urban	Urban	Urban
205	-22.52901622	17.06731764	60401012	Khomasdal North	1	Female	45 - 49	0	0	0	0	0	0	Incomplete primary	1	1	1	1	1	Urban	Urban	Urban	Urban
206	-22.52913245	17.0674233	60401012	Khomasdal North	5	Female	50 - 54	0	0	0	0	0	1	Complete primary	1	1	1	1	1	Urban	Urban	Urban	Urban
207	-22.52650683	17.06789876	60401012	Khomasdal North	1	Male	40 - 44	0	0	0	0	0	0	Complete primary	1	1	1	1	1	Urban	Urban	Urban	Urban
208	-22.52668645	17.0678882	60401012	Khomasdal North	3	Female	30 - 34	0	0	1	0	0	0	Incomplete primary	1	1	1	1	1	Urban	Urban	Urban	Urban
209	-22.52681852	17.06784065	60401012	Khomasdal North	5	Female	35 - 39	0	0	0	0	0	1	Complete primary	1	1	1	1	1	Urban	Urban	Urban	Urban
210	-22.52476346	17.06809423	60401012	Khomasdal North	3	Female	35 - 39	0	0	0	0	0	1	Complete tertiary	1	1	1	1	0	Urban	Urban	Urban	Urban
211	-22.5251544	17.06917723	60401012	Khomasdal North	4	Male	30 - 34	0	0	0	0	1	1	Complete secondary	1	1	1	1	1	Urban	Urban	Urban	Urban
212	-22.52466837	17.06792518	60401012	Khomasdal North	4	Male	45 - 49	0	0	0	0	0	0	Complete tertiary	1	1	1	1	0	Urban	Urban	Urban	Urban
213	-22.53803926	17.06174438	60401013	Khomasdal North	4	Male	25 - 29	0	0	0	0	0	0	Complete tertiary	1	1	1	1	1	Urban	Urban	Urban	Urban
214	-22.53807175	17.06186134	60401013	Khomasdal North	7	Male	40 - 44	0	0	0	0	0	1	Complete primary	1	1	1	1	1	Urban	Urban	Urban	Urban
215	-22.53813672	17.0619848	60401013	Khomasdal North	1	Male	50 - 54	0	0	1	0	0	0	Complete primary	1	1	1	1	1	Urban	Urban	Urban	Urban
216	-22.5382212	17.06210826	60401013	Khomasdal North	3	Female	55 - 59	0	0	0	0	0	0	Complete primary	1	1	1	1	1	Urban	Urban	Urban	Urban
217	-22.538225	17.06220483	60401013	Khomasdal North	2	Female	25 - 29	0	0	0	0	0	1	Complete primary	1	1	1	1	1	Urban	Urban	Urban	Urban
218	-22.53834466	17.06233569	60401013	Khomasdal North	1	Male	45 - 49	0	0	0	0	0	0	Incomplete primary	1	1	1	1	1	Urban	Urban	Urban	Urban
219	-22.53843563	17.06249814	60401013	Khomasdal North	1	Female	20 - 24	0	0	1	0	0	0	Complete secondary	1	1	1	1	1	Urban	Urban	Urban	Urban
220	-22.53850061	17.06237468	60401013	Khomasdal North	2	Male	45 - 49	0	0	0	0	0	0	Complete tertiary	1	1	1	1	1	Urban	Urban	Urban	Urban
221	-22.53855259	17.06205628	60401013	Khomasdal North	2	Male	45 - 49	0	0	0	0	0	0	Incomplete primary	1	1	1	1	1	Urban	Urban	Urban	Urban
222	-22.53848761	17.06194581	60401013	Khomasdal North	8	Female	45 - 49	0	0	1	0	0	0	No formal	1	1	1	1	1	Urban	Urban	Urban	Urban
223	-22.53842913	17.06177687	60401013	Khomasdal North	3	Male	55 - 59	0	0	0	0	0	0	Complete tertiary	1	1	1	1	1	Urban	Urban	Urban	Urban
224	-22.53835765	17.06180936	60401013	Khomasdal North	1	Female	25 - 29	0	0	0	0	0	0	Complete tertiary	1	1	1	1	1	Urban	Urban	Urban	Urban
225	-22.53830567	17.06176387	60401013	Khomasdal North	3	Male	40 - 44	0	0	1	0	0	0	Complete tertiary	1	1	1	1	1	Urban	Urban	Urban	Urban
226	-22.538454	17.0616925	60401013	Khomasdal North	1	Male	30 - 34	0	0	0	0	0	0	Complete primary	1	1	1	1	1	Urban	Urban	Urban	Urban
227	-22.53835765	17.06153644	60401013	Khomasdal North	3	Male	25 - 29	0	0	0	0	0	0	Complete primary	1	1	1	1	1	Urban	Urban	Urban	Urban
228	-22.53928036	17.06131551	60401013	Khomasdal North	5	Female	35 - 39	0	0	1	0	0	0	Complete primary	1	1	1	1	0	Urban	Urban	Urban	Urban
229	-22.53917639	17.06110108	60401013	Khomasdal North	1	Female	20 - 24	0	0	0	0	0	0	Complete secondary	1	1	1	1	1	Urban	Urban	Urban	Urban
230	-22.53928036	17.06131551	60401013	Khomasdal North	4	Male	20 - 24	0	0	0	0	0	0	Complete secondary	1	1	1	1	1	Urban	Urban	Urban	Urban
231	-22.53932584	17.06147146	60401013	Khomasdal North	4	Female	50 - 54	0	0	0	0	1	0	Complete primary	1	1	1	1	1	Urban	Urban	Urban	Urban
232	-22.53923487	17.06126353	60401013	Khomasdal North	5	Female	40 - 44	0	0	0	0	1	1	Complete secondary	1	1	1	1	1	Urban	Urban	Urban	Urban
233	-22.5391439	17.06173138	60401013	Khomasdal North	4	Male	60 - 64	0	0	0	0	0	0	Incomplete primary	1	1	1	1	1	Urban	Urban	Urban	Urban
234	-22.53911141	17.06158843	60401013	Khomasdal North	2	Female	25 - 29	0	0	1	0	0	1	Complete secondary	1	1	1	1	0	Urban	Urban	Urban	Urban
235	-22.53899445	17.06178986	60401013	Khomasdal North	3	Female	45 - 49	0	0	0	0	0	0	Complete secondary	1	1	1	1	1	Urban	Urban	Urban	Urban
236	-22.53887749	17.06176387	60401013	Khomasdal North	10	Female	35 - 39	0	0	0	0	0	1	Complete primary	1	1	1	1	1	Urban	Urban	Urban	Urban
237	-22.53868255	17.06164041	60401013	Khomasdal North	2	Female	40 - 44	0	0	0	0	0	0	Complete primary	1	1	1	1	1	Urban	Urban	Urban	Urban
238	-22.53875403	17.06158843	60401013	Khomasdal North	2	Female	45 - 49	0	0	0	0	0	0	Complete primary	1	1	1	1	1	Urban	Urban	Urban	Urban
239	-22.53881901	17.06150395	60401013	Khomasdal North	2	Male	30 - 34	0	0	0	0	0	0	Complete primary	1	1	1	1	1	Urban	Urban	Urban	Urban
240	-22.53874103	17.06129602	60401013	Khomasdal North	5	Male	25 - 29	0	0	0	0	0	0	Complete tertiary	1	1	1	1	1	Urban	Urban	Urban	Urban
241	-22.53863057	17.06132201	60401013	Khomasdal North	5	Male	40 - 44	0	1	0	0	1	0	Complete primary	1	1	1	1	1	Urban	Urban	Urban	Urban
242	-22.53865656	17.06149096	60401013	Khomasdal North	2	Male	30 - 34	0	0	1	0	0	0	Complete primary	1	1	1	1	1	Urban	Urban	Urban	Urban
243	-22.53835765	17.06153644	60401013	Khomasdal North	2	Female	35 - 39	0	0	0	0	0	1	Complete primary	1	1	1	1	1	Urban	Urban	Urban	Urban
244	-22.53820167	17.0615325	60401013	Khomasdal North	1	Female	20 - 24	0	0	0	0	0	0	Complete primary	1	1	1	1	1	Urban	Urban	Urban	Urban
245	-22.53827968	17.06169239	60401013	Khomasdal North	8	Female	55 - 59	0	0	0	0	0	1	No formal	1	1	1	1	1	Urban	Urban	Urban	Urban
246	-22.53830567	17.06176387	60401013	Khomasdal North	5	Female	40 - 44	0	0	0	0	0	1	Complete primary	1	1	1	1	0	Urban	Urban	Urban	Urban
247	-22.538454	17.0616925	60401013	Khomasdal North	5	Male	45 - 49	0	0	0	0	0	1	Complete primary	1	1	1	1	1	Urban	Urban	Urban	Urban
248	-22.53835765	17.06180936	60401013	Khomasdal North	7	Female	35 - 39	0	0	0	0	0	0	Complete secondary	1	1	1	1	1	Urban	Urban	Urban	Urban
249	-22.53842913	17.06177687	60401013	Khomasdal North	2	Female	35 - 39	0	0	0	0	0	0	Complete secondary	1	1	1	1	1	Urban	Urban	Urban	Urban
250	-22.53850711	17.06173138	60401013	Khomasdal North	2	Male	30 - 34	0	0	0	0	0	0	Complete primary	1	1	1	1	1	Urban	Urban	Urban	Urban
251	-22.5385201	17.06188733	60401013	Khomasdal North	2	Female	20 - 24	0	0	1	0	0	0	Complete primary	1	1	1	1	1	Urban	Urban	Urban	Urban
252	-22.53848761	17.06194581	60401013	Khomasdal North	2	Female	60 - 64	0	0	0	0	0	0	Complete secondary	1	1	1	1	1	Urban	Urban	Urban	Urban
253	-22.53839014	17.06193282	60401013	Khomasdal North	4	Male	50 - 54	0	0	0	0	1	0	Complete primary	1	1	1	1	1	Urban	Urban	Urban	Urban
254	-22.53855259	17.06205628	60401013	Khomasdal North	2	Male	20 - 24	0	0	0	0	0	0	Complete secondary	1	1	1	1	1	Urban	Urban	Urban	Urban
255	-22.53861107	17.06201729	60401013	Khomasdal North	8	Male	35 - 39	0	0	1	0	0	1	Complete secondary	1	1	1	1	1	Urban	Urban	Urban	Urban
256	-22.5386405	17.06195833	60401013	Khomasdal North	1	Female	20 - 24	0	0	0	0	0	0	Complete primary	1	1	1	1	0	Urban	Urban	Urban	Urban
257	-22.53855259	17.06205628	60401013	Khomasdal North	8	Male	30 - 34	0	0	1	0	0	1	Complete primary	1	1	1	1	1	Urban	Urban	Urban	Urban
258	-22.53803926	17.06174438	60401013	Khomasdal North	5	Male	50 - 54	0	0	0	0	0	0	Complete primary	1	1	1	1	1	Urban	Urban	Urban	Urban
259	-22.53811723	17.06169239	60401013	Khomasdal North	2	Female	15 - 19	0	0	0	0	0	0	Complete primary	1	1	1	1	1	Urban	Urban	Urban	Urban
260	-22.53807175	17.06186134	60401013	Khomasdal North	4	Male	25 - 29	0	0	1	0	1	1	Complete tertiary	1	1	1	1	1	Urban	Urban	Urban	Urban
261	-22.53821317	17.06181967	60401013	Khomasdal North	4	Female	20 - 24	0	0	0	0	1	1	Complete secondary	1	1	1	1	1	Urban	Urban	Urban	Urban
262	-22.53813672	17.0619848	60401013	Khomasdal North	5	Male	35 - 39	0	0	1	0	0	1	Complete primary	1	1	1	1	1	Urban	Urban	Urban	Urban
263	-22.5382212	17.06210826	60401013	Khomasdal North	1	Female	35 - 39	0	0	1	0	0	0	Complete tertiary	1	1	1	1	1	Urban	Urban	Urban	Urban
264	-22.53827318	17.06226421	60401013	Khomasdal North	7	Male	55 - 59	0	0	0	0	0	1	Complete primary	1	1	1	1	0	Urban	Urban	Urban	Urban
265	-22.53837715	17.06219273	60401013	Khomasdal North	9	Female	35 - 39	0	0	0	0	0	1	Complete secondary	1	1	1	1	1	Urban	Urban	Urban	Urban
266	-22.53834466	17.06233569	60401013	Khomasdal North	5	Female	45 - 49	0	0	0	0	0	0	Complete secondary	1	1	1	1	1	Urban	Urban	Urban	Urban
267	-22.53843563	17.06249814	60401013	Khomasdal North	2	Male	45 - 49	0	1	0	0	0	0	Complete primary	1	1	1	1	1	Urban	Urban	Urban	Urban
268	-22.53850061	17.06237468	60401013	Khomasdal North	1	Male	25 - 29	0	0	0	0	0	0	Complete secondary	1	1	1	1	1	Urban	Urban	Urban	Urban
269	-22.53861107	17.06250463	60401013	Khomasdal North	4	Male	25 - 29	0	0	0	0	1	1	Complete secondary	1	1	1	1	1	Urban	Urban	Urban	Urban
270	-22.53875403	17.06240067	60401013	Khomasdal North	3	Male	40 - 44	0	0	0	0	0	0	Incomplete primary	1	1	1	1	1	Urban	Urban	Urban	Urban
271	-22.53874753	17.06248514	60401013	Khomasdal North	1	Female	20 - 24	0	0	0	0	0	0	Complete secondary	1	1	1	1	1	Urban	Urban	Urban	Urban
272	-22.53892517	17.0624965	60401013	Khomasdal North	6	Male	35 - 39	0	0	0	0	0	1	Complete secondary	1	1	1	1	1	Urban	Urban	Urban	Urban
273	-22.53898795	17.06247214	60401013	Khomasdal North	3	Female	25 - 29	0	0	0	0	0	0	Complete secondary	1	1	1	1	1	Urban	Urban	Urban	Urban
274	-22.53898795	17.06236168	60401013	Khomasdal North	3	Female	45 - 49	0	0	0	0	0	0	Complete primary	1	1	1	1	1	Urban	Urban	Urban	Urban
275	-22.53865333	17.06220933	60401013	Khomasdal North	6	Male	20 - 24	0	0	0	0	0	0	Complete primary	1	1	1	1	0	Urban	Urban	Urban	Urban
276	-22.53874753	17.06210826	60401013	Khomasdal North	1	Male	30 - 34	0	0	0	0	0	0	Complete primary	1	1	1	1	1	Urban	Urban	Urban	Urban
277	-22.5388385	17.06210176	60401013	Khomasdal North	4	Male	40 - 44	0	0	0	0	0	0	Complete tertiary	1	1	1	1	1	Urban	Urban	Urban	Urban
278	-22.53884058	17.06224725	60401013	Khomasdal North	3	Female	30 - 34	0	0	1	0	0	0	Complete primary	1	1	1	1	1	Urban	Urban	Urban	Urban
279	-22.53896196	17.06210826	60401013	Khomasdal North	3	Female	35 - 39	0	0	1	0	0	0	Complete primary	1	1	1	1	1	Urban	Urban	Urban	Urban
280	-22.53909192	17.06208877	60401013	Khomasdal North	10	Female	25 - 29	0	0	0	0	1	1	Complete primary	1	1	1	1	1	Urban	Urban	Urban	Urban
281	-22.53929433	17.06204733	60401013	Khomasdal North	2	Female	30 - 34	0	0	0	0	0	0	No formal	1	1	1	1	1	Urban	Urban	Urban	Urban
282	-22.53924137	17.06217324	60401013	Khomasdal North	1	Male	30 - 34	0	0	1	0	0	0	Complete primary	1	1	1	1	0	Urban	Urban	Urban	Urban
283	-22.5391374	17.06231619	60401013	Khomasdal North	5	Male	30 - 34	0	0	0	0	1	1	Complete primary	1	1	1	1	1	Urban	Urban	Urban	Urban
284	-22.5391374	17.06242016	60401013	Khomasdal North	7	Male	40 - 44	0	0	0	0	0	1	Complete primary	1	1	1	1	1	Urban	Urban	Urban	Urban
285	-22.53927386	17.06243316	60401013	Khomasdal North	5	Male	25 - 29	0	0	1	0	0	0	Complete secondary	1	1	1	1	1	Urban	Urban	Urban	Urban
286	-22.53939732	17.06240067	60401013	Khomasdal North	5	Female	35 - 39	0	0	0	0	0	0	Complete secondary	1	1	1	1	1	Urban	Urban	Urban	Urban
287	-22.53968323	17.06204978	60401013	Khomasdal North	3	Male	30 - 34	0	0	1	0	0	0	Complete secondary	1	1	1	1	1	Urban	Urban	Urban	Urban
288	-22.53970922	17.0622837	60401013	Khomasdal North	2	Female	35 - 39	0	0	0	0	0	1	Complete tertiary	1	1	1	1	1	Urban	Urban	Urban	Urban
289	-22.53968323	17.06244615	60401013	Khomasdal North	3	Male	65 - 74	0	0	0	0	0	0	Incomplete primary	1	1	1	1	1	Urban	Urban	Urban	Urban
290	-22.53982618	17.06241366	60401013	Khomasdal North	1	Female	35 - 39	0	0	0	0	0	0	Complete primary	1	1	1	1	1	Urban	Urban	Urban	Urban
291	-22.53982618	17.0622967	60401013	Khomasdal North	2	Male	30 - 34	0	0	0	0	0	0	Complete tertiary	1	1	1	1	1	Urban	Urban	Urban	Urban
292	-22.53999513	17.06200429	60401013	Khomasdal North	2	Male	35 - 39	0	0	0	0	0	0	Complete secondary	1	1	1	1	1	Urban	Urban	Urban	Urban
293	-22.5400796	17.0619978	60401013	Khomasdal North	7	Female	35 - 39	0	0	1	0	1	1	Complete primary	1	1	1	1	1	Urban	Urban	Urban	Urban
294	-22.54020956	17.0619978	60401013	Khomasdal North	7	Male	40 - 44	0	0	0	0	0	1	Complete secondary	1	1	1	1	1	Urban	Urban	Urban	Urban
295	-22.54032003	17.0619913	60401013	Khomasdal North	4	Female	35 - 39	0	0	1	0	0	1	Complete secondary	1	1	1	1	1	Urban	Urban	Urban	Urban
296	-22.54036551	17.06208227	60401013	Khomasdal North	3	Female	45 - 49	0	0	0	0	0	0	Complete secondary	1	1	1	1	1	Urban	Urban	Urban	Urban
297	-22.54046948	17.06191332	60401013	Khomasdal North	5	Female	35 - 39	0	0	0	0	0	1	Complete secondary	1	1	1	1	0	Urban	Urban	Urban	Urban
298	-22.54051758	17.06206617	60401013	Khomasdal North	6	Male	30 - 34	0	0	1	0	1	1	Complete primary	1	1	1	1	1	Urban	Urban	Urban	Urban
299	-22.54063193	17.06191982	60401013	Khomasdal North	3	Female	35 - 39	0	0	0	0	0	0	Complete secondary	1	1	1	1	1	Urban	Urban	Urban	Urban
300	-22.5407294	17.06206927	60401013	Khomasdal North	1	Male	30 - 34	0	0	0	0	0	0	Complete primary	1	1	1	0	0	Urban	Urban	Urban	Urban
301	-22.54070833	17.06183333	60401013	Khomasdal North	2	Female	20 - 24	0	0	0	0	0	0	Complete secondary	1	1	1	1	1	Urban	Urban	Urban	Urban
302	-22.54088535	17.06188083	60401013	Khomasdal North	2	Female	30 - 34	0	0	1	0	0	0	Complete tertiary	1	1	1	1	1	Urban	Urban	Urban	Urban
303	-22.5410283	17.06184185	60401013	Khomasdal North	6	Male	60 - 64	0	0	0	0	0	1	Complete primary	1	1	1	1	1	Urban	Urban	Urban	Urban
304	-22.54106729	17.06202379	60401013	Khomasdal North	1	Female	15 - 19	0	0	0	0	0	0	Complete secondary	1	1	1	1	1	Urban	Urban	Urban	Urban
305	-22.54115826	17.06184834	60401013	Khomasdal North	5	Male	35 - 39	0	0	1	0	1	1	Complete secondary	1	1	1	1	1	Urban	Urban	Urban	Urban
306	-22.54117125	17.0619978	60401013	Khomasdal North	3	Male	65 - 74	0	0	0	0	0	0	No formal	1	1	1	1	1	Urban	Urban	Urban	Urban
307	-22.54129471	17.06187434	60401013	Khomasdal North	1	Female	15 - 19	0	0	1	0	0	0	Complete secondary	1	1	1	1	1	Urban	Urban	Urban	Urban
308	-22.54147016	17.06189383	60401013	Khomasdal North	4	Female	50 - 54	0	0	0	0	0	0	Complete primary	1	1	1	1	1	Urban	Urban	Urban	Urban
309	-22.54149615	17.06201079	60401013	Khomasdal North	6	Female	40 - 44	0	0	0	0	0	1	Complete primary	1	1	1	1	1	Urban	Urban	Urban	Urban
310	-22.5416521	17.06187434	60401013	Khomasdal North	5	Female	40 - 44	0	0	0	0	0	1	Complete secondary	1	1	1	1	1	Urban	Urban	Urban	Urban
311	-22.54167809	17.06200429	60401013	Khomasdal North	4	Female	30 - 34	0	0	0	0	0	0	Complete secondary	1	1	1	1	1	Urban	Urban	Urban	Urban
312	-22.54178206	17.06176387	60401013	Khomasdal North	6	Female	45 - 49	0	0	0	0	0	0	Complete primary	1	1	1	1	1	Urban	Urban	Urban	Urban
313	-22.54182754	17.06193931	60401013	Khomasdal North	2	Male	30 - 34	0	0	0	0	0	0	Complete secondary	1	1	1	1	1	Urban	Urban	Urban	Urban
314	-22.54189252	17.06177037	60401013	Khomasdal North	4	Female	30 - 34	0	0	0	0	0	1	Complete primary	1	1	1	1	1	Urban	Urban	Urban	Urban
315	-22.54035901	17.0623097	60401013	Khomasdal North	2	Male	30 - 34	0	0	0	0	0	0	Complete secondary	1	1	1	1	1	Urban	Urban	Urban	Urban
316	-22.54049547	17.0623097	60401013	Khomasdal North	2	Male	30 - 34	0	0	0	0	0	0	Complete secondary	1	1	1	1	0	Urban	Urban	Urban	Urban
317	-22.54063193	17.0622837	60401013	Khomasdal North	1	Female	25 - 29	0	0	1	0	0	0	Complete secondary	1	1	1	1	1	Urban	Urban	Urban	Urban
318	-22.54075539	17.0623032	60401013	Khomasdal North	1	Female	30 - 34	0	0	0	0	0	0	Complete tertiary	1	1	1	0	0	Urban	Urban	Urban	Urban
319	-22.54089184	17.06227721	60401013	Khomasdal North	7	Male	45 - 49	0	0	1	0	0	1	Incomplete primary	1	1	1	1	1	Urban	Urban	Urban	Urban
320	-22.54106079	17.06227721	60401013	Khomasdal North	2	Female	20 - 24	0	0	1	0	0	0	Complete primary	1	1	1	1	1	Urban	Urban	Urban	Urban
321	-22.54117125	17.06223822	60401013	Khomasdal North	1	Female	20 - 24	0	0	1	0	0	0	Complete primary	1	1	1	1	1	Urban	Urban	Urban	Urban
322	-22.54167159	17.06218624	60401013	Khomasdal North	2	Male	35 - 39	0	0	1	0	0	0	Complete primary	1	1	1	1	1	Urban	Urban	Urban	Urban
323	-22.54180155	17.06218624	60401013	Khomasdal North	7	Male	40 - 44	0	0	1	0	1	1	Complete primary	1	1	1	1	1	Urban	Urban	Urban	Urban
324	-22.541977	17.06214075	60401013	Khomasdal North	3	Male	35 - 39	0	0	0	0	0	1	Complete secondary	1	1	1	1	1	Urban	Urban	Urban	Urban
325	-22.54208096	17.06215375	60401013	Khomasdal North	7	Female	30 - 34	0	1	1	0	1	1	Complete tertiary	1	1	1	1	1	Urban	Urban	Urban	Urban
326	-22.54208096	17.06206277	60401013	Khomasdal North	6	Male	40 - 44	0	0	0	0	0	0	Complete tertiary	1	1	1	1	1	Urban	Urban	Urban	Urban
327	-22.54207447	17.06191982	60401013	Khomasdal North	6	Male	30 - 34	0	0	0	0	0	0	Complete secondary	1	1	1	1	1	Urban	Urban	Urban	Urban
328	-22.54206147	17.06178336	60401013	Khomasdal North	6	Female	45 - 49	0	0	0	0	0	0	Complete primary	1	1	1	1	1	Urban	Urban	Urban	Urban
329	-22.53941682	17.06403814	60401013	Khomasdal North	4	Female	45 - 49	0	0	0	0	1	0	Complete primary	1	1	1	1	1	Urban	Urban	Urban	Urban
330	-22.53955327	17.0641811	60401013	Khomasdal North	1	Male	20 - 24	0	0	1	0	0	0	Complete secondary	1	1	1	1	1	Urban	Urban	Urban	Urban
331	-22.53957277	17.06451249	60401013	Khomasdal North	4	Male	35 - 39	0	0	0	0	0	0	Complete tertiary	1	1	1	1	1	Urban	Urban	Urban	Urban
332	-22.5394623	17.06466194	60401013	Khomasdal North	1	Male	35 - 39	0	0	0	0	0	0	Complete primary	1	1	1	1	1	Urban	Urban	Urban	Urban
333	-22.53963125	17.06522076	60401013	Khomasdal North	5	Male	40 - 44	0	0	0	0	0	0	No formal	1	1	1	1	1	Urban	Urban	Urban	Urban
334	-22.53980669	17.06537672	60401013	Khomasdal North	5	Male	40 - 44	0	0	0	0	0	0	Complete primary	1	1	1	1	1	Urban	Urban	Urban	Urban
335	-22.53982618	17.06569511	60401013	Khomasdal North	2	Female	35 - 39	0	0	0	0	0	0	Complete tertiary	1	1	1	1	1	Urban	Urban	Urban	Urban
336	-22.53970272	17.06584457	60401013	Khomasdal North	3	Female	25 - 29	0	0	0	0	0	0	Complete secondary	1	1	1	1	0	Urban	Urban	Urban	Urban
337	-22.53944281	17.06630592	60401013	Khomasdal North	2	Male	30 - 34	0	0	0	0	0	0	Complete primary	1	1	1	1	1	Urban	Urban	Urban	Urban
338	-22.53954028	17.06641638	60401013	Khomasdal North	3	Male	30 - 34	0	0	1	0	0	1	Complete secondary	1	1	1	1	1	Urban	Urban	Urban	Urban
339	-22.53938858	17.06685342	60401013	Khomasdal North	4	Male	40 - 44	0	0	0	0	0	1	Complete secondary	1	1	1	1	0	Urban	Urban	Urban	Urban
340	-22.53917639	17.06466194	60401013	Khomasdal North	1	Male	25 - 29	0	0	0	0	0	0	Complete tertiary	1	1	1	1	1	Urban	Urban	Urban	Urban
341	-22.53931633	17.06338883	60401013	Khomasdal North	1	Male	30 - 34	0	0	0	0	0	0	Complete primary	1	1	1	1	1	Urban	Urban	Urban	Urban
342	-22.53965724	17.05904124	60401014	Khomasdal North	1	Female	30 - 34	0	0	1	0	0	0	Complete primary	1	1	1	1	1	Urban	Urban	Urban	Urban
343	-22.53957926	17.0591582	60401014	Khomasdal North	2	Female	20 - 24	0	0	1	0	0	0	Complete secondary	1	1	1	1	1	Urban	Urban	Urban	Urban
344	-22.53956627	17.05933365	60401014	Khomasdal North	1	Male	25 - 29	0	0	0	0	0	0	Complete primary	1	1	1	1	1	Urban	Urban	Urban	Urban
345	-22.53965724	17.05932715	60401014	Khomasdal North	6	Female	40 - 44	0	0	1	0	0	1	Complete primary	1	1	1	1	1	Urban	Urban	Urban	Urban
346	-22.53972222	17.05931415	60401014	Khomasdal North	2	Female	30 - 34	0	0	0	0	0	1	Complete secondary	1	1	1	1	1	Urban	Urban	Urban	Urban
347	-22.53955327	17.05945711	60401014	Khomasdal North	2	Male	35 - 39	0	0	0	0	0	1	Complete secondary	1	1	1	1	1	Urban	Urban	Urban	Urban
348	-22.53955977	17.05962605	60401014	Khomasdal North	7	Male	50 - 54	0	0	0	0	0	0	Complete primary	1	1	1	1	1	Urban	Urban	Urban	Urban
349	-22.53956627	17.059795	60401014	Khomasdal North	3	Female	60 - 64	0	0	1	0	0	1	Complete primary	1	1	1	1	1	Urban	Urban	Urban	Urban
350	-22.53954677	17.05992496	60401014	Khomasdal North	4	Male	35 - 39	0	0	0	0	0	1	Complete primary	1	1	1	1	1	Urban	Urban	Urban	Urban
351	-22.53952078	17.06005492	60401014	Khomasdal North	3	Male	35 - 39	0	0	0	0	0	0	Complete tertiary	1	1	1	1	1	Urban	Urban	Urban	Urban
352	-22.53961825	17.06006791	60401014	Khomasdal North	6	Female	25 - 29	0	0	0	0	0	0	Complete secondary	1	1	1	1	1	Urban	Urban	Urban	Urban
353	-22.53952078	17.06019787	60401014	Khomasdal North	3	Male	35 - 39	0	0	1	0	0	0	Complete secondary	1	1	1	1	1	Urban	Urban	Urban	Urban
354	-22.53965724	17.06021087	60401014	Khomasdal North	1	Female	20 - 24	0	0	1	0	0	0	Complete primary	1	1	1	1	0	Urban	Urban	Urban	Urban
355	-22.53980669	17.05906723	60401014	Khomasdal North	4	Female	45 - 49	0	0	0	0	1	0	Complete primary	1	1	1	1	1	Urban	Urban	Urban	Urban
356	-22.53995614	17.05903474	60401014	Khomasdal North	4	Female	45 - 49	0	0	0	0	0	0	Complete secondary	1	1	1	1	1	Urban	Urban	Urban	Urban
357	-22.53996914	17.05924917	60401014	Khomasdal North	7	Male	45 - 49	0	0	0	0	0	0	Complete tertiary	1	1	1	1	1	Urban	Urban	Urban	Urban
358	-22.53990416	17.05935964	60401014	Khomasdal North	2	Female	25 - 29	0	0	0	0	0	0	Complete secondary	1	1	1	1	0	Urban	Urban	Urban	Urban
359	-22.53993015	17.0594896	60401014	Khomasdal North	5	Male	35 - 39	0	0	1	0	0	1	Complete secondary	1	1	1	1	1	Urban	Urban	Urban	Urban
360	-22.53992365	17.05964555	60401014	Khomasdal North	7	Male	45 - 49	0	1	0	0	1	1	Complete secondary	1	1	1	1	1	Urban	Urban	Urban	Urban
361	-22.5397742	17.05967804	60401014	Khomasdal North	3	Female	45 - 49	0	0	0	0	0	1	Complete tertiary	1	1	1	1	1	Urban	Urban	Urban	Urban
362	-22.5397872	17.05977551	60401014	Khomasdal North	3	Male	50 - 54	0	0	0	0	0	0	Complete primary	1	1	1	1	1	Urban	Urban	Urban	Urban
363	-22.53992365	17.059782	60401014	Khomasdal North	2	Male	25 - 29	0	0	0	0	0	0	Complete tertiary	1	1	1	1	1	Urban	Urban	Urban	Urban
364	-22.53991716	17.05996395	60401014	Khomasdal North	6	Female	50 - 54	0	0	0	0	0	0	Incomplete primary	1	1	1	1	1	Urban	Urban	Urban	Urban
365	-22.53987817	17.06006791	60401014	Khomasdal North	4	Female	35 - 39	0	1	0	0	1	0	Complete primary	1	1	1	1	1	Urban	Urban	Urban	Urban
366	-22.53980669	17.0601004	60401014	Khomasdal North	6	Male	50 - 54	0	0	0	0	0	0	Complete secondary	1	1	1	1	1	Urban	Urban	Urban	Urban
367	-22.53973521	17.0601004	60401014	Khomasdal North	8	Male	50 - 54	0	0	1	0	0	0	Complete primary	1	1	1	1	1	Urban	Urban	Urban	Urban
368	-22.53984568	17.06026935	60401014	Khomasdal North	4	Male	30 - 34	0	1	0	0	1	0	Complete primary	1	1	1	1	1	Urban	Urban	Urban	Urban
369	-22.53987817	17.06037332	60401014	Khomasdal North	4	Female	35 - 39	0	1	0	0	0	0	Complete primary	1	1	1	1	1	Urban	Urban	Urban	Urban
370	-22.53993665	17.06050327	60401014	Khomasdal North	4	Female	20 - 24	0	0	0	0	1	1	Complete primary	1	1	1	1	1	Urban	Urban	Urban	Urban
371	-22.53983268	17.06049678	60401014	Khomasdal North	3	Male	20 - 24	0	0	1	0	0	0	Complete tertiary	1	1	1	1	1	Urban	Urban	Urban	Urban
372	-22.53991066	17.06067872	60401014	Khomasdal North	5	Male	40 - 44	0	0	1	0	1	0	Complete primary	1	1	1	1	0	Urban	Urban	Urban	Urban
373	-22.53979369	17.06067872	60401014	Khomasdal North	8	Male	30 - 34	0	0	1	0	0	1	Complete primary	1	1	1	1	1	Urban	Urban	Urban	Urban
374	-22.53992365	17.06075669	60401014	Khomasdal North	4	Female	50 - 54	0	0	1	0	0	0	Complete primary	1	1	1	1	1	Urban	Urban	Urban	Urban
375	-22.53983268	17.06081517	60401014	Khomasdal North	4	Male	30 - 34	0	0	1	0	1	1	Complete tertiary	1	1	1	1	1	Urban	Urban	Urban	Urban
376	-22.53993665	17.06092564	60401014	Khomasdal North	5	Female	35 - 39	0	0	1	0	0	0	Complete tertiary	1	1	1	1	1	Urban	Urban	Urban	Urban
377	-22.53998213	17.0610361	60401014	Khomasdal North	2	Male	20 - 24	0	0	1	0	0	0	Complete primary	1	1	1	1	0	Urban	Urban	Urban	Urban
378	-22.53999513	17.06121155	60401014	Khomasdal North	4	Male	55 - 59	0	0	0	0	0	0	No formal	1	1	1	1	1	Urban	Urban	Urban	Urban
379	-22.53999513	17.0613675	60401014	Khomasdal North	5	Male	35 - 39	0	0	1	0	0	0	Complete primary	1	1	1	1	1	Urban	Urban	Urban	Urban
380	-22.54000163	17.06145197	60401014	Khomasdal North	4	Female	25 - 29	0	0	0	0	1	1	Complete tertiary	1	1	1	1	1	Urban	Urban	Urban	Urban
381	-22.54000163	17.06162741	60401014	Khomasdal North	1	Male	45 - 49	0	0	1	0	0	0	Complete secondary	1	1	1	1	1	Urban	Urban	Urban	Urban
382	-22.53964424	17.06169889	60401014	Khomasdal North	1	Male	30 - 34	0	0	0	0	0	0	Complete primary	1	1	1	1	1	Urban	Urban	Urban	Urban
383	-22.53961175	17.06152345	60401014	Khomasdal North	4	Female	40 - 44	0	0	0	0	0	0	Complete primary	1	1	1	1	1	Urban	Urban	Urban	Urban
384	-22.53970922	17.06149746	60401014	Khomasdal North	4	Female	45 - 49	0	0	0	0	0	1	Complete primary	1	1	1	1	1	Urban	Urban	Urban	Urban
385	-22.53961175	17.061361	60401014	Khomasdal North	9	Male	45 - 49	0	0	0	0	0	1	Complete primary	1	1	1	1	1	Urban	Urban	Urban	Urban
386	-22.53960526	17.06123104	60401014	Khomasdal North	7	Male	50 - 54	0	0	0	0	0	0	No formal	1	1	1	1	1	Urban	Urban	Urban	Urban
387	-22.53960526	17.06106859	60401014	Khomasdal North	8	Female	30 - 34	0	0	1	0	1	0	Complete primary	1	1	1	1	0	Urban	Urban	Urban	Urban
388	-22.53960526	17.06095813	60401014	Khomasdal North	3	Male	20 - 24	0	0	0	0	0	0	Complete secondary	1	1	1	1	1	Urban	Urban	Urban	Urban
389	-22.53958576	17.06077619	60401014	Khomasdal North	6	Male	35 - 39	0	0	0	0	0	0	Complete secondary	1	1	1	1	1	Urban	Urban	Urban	Urban
390	-22.53955327	17.06067872	60401014	Khomasdal North	2	Female	25 - 29	0	0	1	0	0	1	Complete secondary	1	1	1	1	1	Urban	Urban	Urban	Urban
391	-22.53954028	17.06052927	60401014	Khomasdal North	2	Female	30 - 34	0	0	1	0	0	0	Complete tertiary	1	1	1	1	1	Urban	Urban	Urban	Urban
392	-22.53955327	17.0604253	60401014	Khomasdal North	4	Female	60 - 64	0	0	0	0	1	1	Complete primary	1	1	1	1	1	Urban	Urban	Urban	Urban
393	-22.53886449	17.05898276	60401014	Khomasdal North	2	Male	20 - 24	0	0	0	0	0	0	Complete primary	1	1	1	1	0	Urban	Urban	Urban	Urban
394	-22.53899445	17.05897626	60401014	Khomasdal North	5	Male	35 - 39	0	1	0	0	0	1	Incomplete primary	1	1	1	1	1	Urban	Urban	Urban	Urban
395	-22.53894247	17.05909322	60401014	Khomasdal North	10	Male	25 - 29	0	0	0	0	0	0	Complete secondary	1	1	1	1	1	Urban	Urban	Urban	Urban
396	-22.53894247	17.0591712	60401014	Khomasdal North	3	Female	25 - 29	0	0	0	0	0	0	Complete secondary	1	1	1	1	1	Urban	Urban	Urban	Urban
397	-22.53894247	17.0591712	60401014	Khomasdal North	5	Female	40 - 44	0	0	1	0	0	0	Complete tertiary	1	1	1	1	1	Urban	Urban	Urban	Urban
398	-22.53894247	17.05931415	60401014	Khomasdal North	6	Female	35 - 39	0	0	0	0	0	1	Complete primary	1	1	1	1	1	Urban	Urban	Urban	Urban
399	-22.53894247	17.05940512	60401014	Khomasdal North	6	Male	45 - 49	0	0	0	0	0	1	Complete tertiary	1	1	1	1	1	Urban	Urban	Urban	Urban
400	-22.53894247	17.05940512	60401014	Khomasdal North	5	Male	35 - 39	0	0	0	0	0	0	Complete secondary	1	1	1	1	1	Urban	Urban	Urban	Urban
401	-22.53892297	17.05958057	60401014	Khomasdal North	1	Male	45 - 49	0	0	0	0	0	0	Complete primary	1	1	1	1	1	Urban	Urban	Urban	Urban
402	-22.53886449	17.05964555	60401014	Khomasdal North	5	Male	45 - 49	0	1	0	0	0	0	Complete secondary	1	1	1	1	0	Urban	Urban	Urban	Urban
403	-22.53893597	17.05969753	60401014	Khomasdal North	4	Male	45 - 49	0	0	1	0	0	1	Complete primary	1	1	1	1	1	Urban	Urban	Urban	Urban
404	-22.53889698	17.05981449	60401014	Khomasdal North	7	Male	40 - 44	0	0	0	0	1	1	Complete secondary	1	1	1	1	1	Urban	Urban	Urban	Urban
405	-22.5388255	17.05989247	60401014	Khomasdal North	7	Male	20 - 24	0	0	1	0	0	0	Complete primary	1	1	1	1	1	Urban	Urban	Urban	Urban
406	-22.53891648	17.05993146	60401014	Khomasdal North	5	Male	50 - 54	1	0	0	0	0	0	Complete primary	1	1	1	1	1	Urban	Urban	Urban	Urban
407	-22.53887099	17.06004842	60401014	Khomasdal North	3	Male	30 - 34	0	0	0	0	0	0	Complete tertiary	1	1	1	1	1	Urban	Urban	Urban	Urban
408	-22.53897496	17.06006791	60401014	Khomasdal North	1	Male	35 - 39	0	0	1	0	0	0	Complete tertiary	1	1	1	1	1	Urban	Urban	Urban	Urban
409	-22.53889048	17.06015888	60401014	Khomasdal North	2	Male	45 - 49	0	0	1	0	0	0	Complete primary	1	1	1	1	1	Urban	Urban	Urban	Urban
410	-22.53887099	17.06032783	60401014	Khomasdal North	3	Male	25 - 29	0	0	1	0	0	1	Complete primary	1	1	1	1	1	Urban	Urban	Urban	Urban
411	-22.53896196	17.06032133	60401014	Khomasdal North	4	Male	40 - 44	0	0	1	0	0	0	Complete secondary	1	1	1	1	1	Urban	Urban	Urban	Urban
412	-22.53894897	17.06047078	60401014	Khomasdal North	2	Male	20 - 24	0	0	0	0	0	0	Complete tertiary	1	1	1	1	0	Urban	Urban	Urban	Urban
413	-22.53885799	17.06050327	60401014	Khomasdal North	3	Male	55 - 59	0	0	0	0	0	0	Incomplete primary	1	1	1	1	1	Urban	Urban	Urban	Urban
414	-22.53887749	17.06058125	60401014	Khomasdal North	8	Male	40 - 44	0	0	0	0	0	1	Complete primary	1	1	1	1	1	Urban	Urban	Urban	Urban
415	-22.53895546	17.06059424	60401014	Khomasdal North	5	Male	50 - 54	0	0	1	0	0	1	Complete primary	1	1	1	1	1	Urban	Urban	Urban	Urban
416	-22.53895546	17.06059424	60401014	Khomasdal North	1	Male	25 - 29	0	0	0	0	0	0	Complete secondary	1	1	1	1	1	Urban	Urban	Urban	Urban
417	-22.53891648	17.0607372	60401014	Khomasdal North	1	Male	25 - 29	0	0	0	0	0	0	Complete tertiary	1	1	1	1	1	Urban	Urban	Urban	Urban
418	-22.53894247	17.06083467	60401014	Khomasdal North	7	Female	50 - 54	0	0	0	0	0	1	Complete primary	1	1	1	1	1	Urban	Urban	Urban	Urban
419	-22.53911791	17.06084766	60401014	Khomasdal North	6	Female	25 - 29	0	0	1	0	0	1	Complete secondary	1	1	1	1	1	Urban	Urban	Urban	Urban
420	-22.53924787	17.06082167	60401014	Khomasdal North	2	Male	35 - 39	0	0	1	0	0	0	Complete secondary	1	1	1	1	0	Urban	Urban	Urban	Urban
421	-22.53922188	17.06075669	60401014	Khomasdal North	2	Male	30 - 34	0	0	1	0	0	0	Incomplete primary	1	1	1	1	1	Urban	Urban	Urban	Urban
422	-22.53907892	17.06058775	60401014	Khomasdal North	1	Female	25 - 29	0	0	1	0	0	0	Complete tertiary	1	1	1	1	1	Urban	Urban	Urban	Urban
423	-22.53917639	17.06056825	60401014	Khomasdal North	2	Male	25 - 29	0	0	1	0	0	0	Complete secondary	1	1	1	1	1	Urban	Urban	Urban	Urban
424	-22.53917639	17.06056825	60401014	Khomasdal North	4	Male	45 - 49	0	0	0	0	0	0	Complete secondary	1	1	1	1	1	Urban	Urban	Urban	Urban
425	-22.53922188	17.06047078	60401014	Khomasdal North	3	Female	30 - 34	0	0	0	0	0	0	Complete secondary	1	1	1	1	1	Urban	Urban	Urban	Urban
426	-22.53909192	17.06030184	60401014	Khomasdal North	3	Male	25 - 29	0	0	1	0	0	0	Complete secondary	1	1	1	1	1	Urban	Urban	Urban	Urban
427	-22.53918939	17.06033433	60401014	Khomasdal North	1	Female	30 - 34	0	0	0	0	0	0	Complete secondary	1	1	1	1	1	Urban	Urban	Urban	Urban
428	-22.53920238	17.06019787	60401014	Khomasdal North	6	Female	25 - 29	0	0	1	0	1	1	Complete primary	1	1	1	1	1	Urban	Urban	Urban	Urban
429	-22.53918939	17.0601199	60401014	Khomasdal North	6	Female	30 - 34	0	1	0	0	0	1	Complete primary	1	1	1	1	1	Urban	Urban	Urban	Urban
430	-22.53912441	17.05997694	60401014	Khomasdal North	3	Female	50 - 54	0	0	0	0	0	0	Complete primary	1	1	1	1	1	Urban	Urban	Urban	Urban
431	-22.53922838	17.06000293	60401014	Khomasdal North	1	Male	50 - 54	0	0	0	0	0	0	Complete primary	1	1	1	1	0	Urban	Urban	Urban	Urban
432	-22.53920888	17.05990546	60401014	Khomasdal North	2	Male	25 - 29	0	0	1	0	0	0	Complete secondary	1	1	1	1	1	Urban	Urban	Urban	Urban
433	-22.53921538	17.05977551	60401014	Khomasdal North	1	Female	20 - 24	0	0	0	0	0	0	Complete secondary	1	1	1	1	1	Urban	Urban	Urban	Urban
434	-22.53922188	17.05965854	60401014	Khomasdal North	3	Female	35 - 39	0	0	0	0	0	0	Complete primary	1	1	1	1	1	Urban	Urban	Urban	Urban
435	-22.5391504	17.05961956	60401014	Khomasdal North	5	Male	35 - 39	0	0	1	0	0	1	Complete secondary	1	1	1	1	0	Urban	Urban	Urban	Urban
436	-22.53912441	17.05950259	60401014	Khomasdal North	8	Male	20 - 24	0	0	0	0	0	0	Complete secondary	1	1	1	1	1	Urban	Urban	Urban	Urban
437	-22.53916989	17.05934664	60401014	Khomasdal North	2	Male	30 - 34	0	0	1	0	0	0	Complete primary	1	1	1	1	1	Urban	Urban	Urban	Urban
438	-22.53926087	17.05936614	60401014	Khomasdal North	3	Female	45 - 49	0	0	0	0	0	0	Complete primary	1	1	1	1	1	Urban	Urban	Urban	Urban
439	-22.5391569	17.05924268	60401014	Khomasdal North	9	Female	45 - 49	0	0	0	0	1	1	Complete tertiary	1	1	1	1	1	Urban	Urban	Urban	Urban
440	-22.53926087	17.05923618	60401014	Khomasdal North	6	Female	15 - 19	0	0	0	0	0	1	Complete secondary	1	1	1	1	1	Urban	Urban	Urban	Urban
441	-22.53924137	17.05915171	60401014	Khomasdal North	1	Male	50 - 54	0	0	1	0	0	0	Complete tertiary	1	1	1	1	1	Urban	Urban	Urban	Urban
442	-22.53928686	17.05903474	60401014	Khomasdal North	5	Female	30 - 34	0	1	1	0	1	1	Complete primary	1	1	1	1	1	Urban	Urban	Urban	Urban
443	-22.53918939	17.05900225	60401014	Khomasdal North	3	Female	35 - 39	0	0	0	0	0	1	Incomplete primary	1	1	1	1	1	Urban	Urban	Urban	Urban
444	-22.54237337	17.06139999	60401014	Khomasdal North	2	Female	50 - 54	0	0	0	0	0	0	Complete tertiary	1	1	1	1	1	Urban	Urban	Urban	Urban
445	-22.5423175	17.06123233	60401014	Khomasdal North	3	Female	35 - 39	0	0	0	0	0	0	Complete tertiary	1	1	1	1	1	Urban	Urban	Urban	Urban
446	-22.54232788	17.06112707	60401014	Khomasdal North	6	Male	35 - 39	0	0	0	0	1	0	Complete primary	1	1	1	1	1	Urban	Urban	Urban	Urban
447	-22.54232139	17.06099712	60401014	Khomasdal North	5	Male	55 - 59	0	0	0	0	0	0	Complete primary	1	1	1	1	1	Urban	Urban	Urban	Urban
448	-22.54229539	17.06081517	60401014	Khomasdal North	2	Male	40 - 44	0	0	0	0	0	0	Complete secondary	1	1	1	1	1	Urban	Urban	Urban	Urban
449	-22.54229539	17.06071121	60401014	Khomasdal North	2	Female	25 - 29	0	0	0	0	0	1	Complete primary	1	1	1	1	1	Urban	Urban	Urban	Urban
450	-22.5422824	17.06052277	60401014	Khomasdal North	2	Female	30 - 34	0	0	1	0	0	0	Complete primary	1	1	1	1	0	Urban	Urban	Urban	Urban
451	-22.54236037	17.0604253	60401014	Khomasdal North	3	Female	25 - 29	0	0	1	0	0	0	Complete primary	1	1	1	1	1	Urban	Urban	Urban	Urban
452	-22.54233438	17.05999644	60401014	Khomasdal North	3	Male	60 - 64	0	0	0	0	0	0	Complete secondary	1	1	1	1	1	Urban	Urban	Urban	Urban
453	-22.54233438	17.05985998	60401014	Khomasdal North	2	Female	40 - 44	0	0	0	0	0	0	Complete tertiary	1	1	1	1	0	Urban	Urban	Urban	Urban
454	-22.54234088	17.05971702	60401014	Khomasdal North	5	Male	35 - 39	0	0	1	0	0	1	Complete tertiary	1	1	1	1	1	Urban	Urban	Urban	Urban
455	-22.54239286	17.05958707	60401014	Khomasdal North	3	Male	30 - 34	0	0	0	0	0	0	Complete primary	1	1	1	1	1	Urban	Urban	Urban	Urban
456	-22.5425943	17.05963255	60401014	Khomasdal North	3	Female	45 - 49	0	0	1	0	0	0	Complete primary	1	1	1	1	1	Urban	Urban	Urban	Urban
457	-22.54268527	17.05967804	60401014	Khomasdal North	5	Male	35 - 39	0	0	1	0	0	1	Complete primary	1	1	1	1	1	Urban	Urban	Urban	Urban
458	-22.54265278	17.0597885	60401014	Khomasdal North	2	Male	45 - 49	0	0	0	0	0	0	Complete tertiary	1	1	1	1	1	Urban	Urban	Urban	Urban
459	-22.5425878	17.05995095	60401014	Khomasdal North	2	Female	30 - 34	0	0	1	0	0	0	Complete tertiary	1	1	1	1	1	Urban	Urban	Urban	Urban
460	-22.54256181	17.06004842	60401014	Khomasdal North	1	Female	20 - 24	0	0	0	0	0	0	Complete secondary	1	1	1	1	1	Urban	Urban	Urban	Urban
461	-22.5426205	17.06050833	60401014	Khomasdal North	6	Female	35 - 39	0	0	0	0	0	0	Complete secondary	1	1	1	1	1	Urban	Urban	Urban	Urban
462	-22.54255531	17.06065922	60401014	Khomasdal North	5	Female	40 - 44	0	0	1	0	0	0	Incomplete primary	1	1	1	1	1	Urban	Urban	Urban	Urban
463	-22.54257481	17.06080868	60401014	Khomasdal North	2	Female	25 - 29	0	0	0	0	0	0	Complete primary	1	1	1	1	1	Urban	Urban	Urban	Urban
464	-22.54267183	17.060764	60401014	Khomasdal North	7	Female	55 - 59	0	0	0	0	0	0	Complete primary	1	1	1	1	1	Urban	Urban	Urban	Urban
465	-22.54263329	17.06094513	60401014	Khomasdal North	1	Female	40 - 44	0	0	0	0	0	0	No formal	1	1	1	1	1	Urban	Urban	Urban	Urban
466	-22.54268667	17.061044	60401014	Khomasdal North	4	Male	35 - 39	0	0	0	0	0	0	Complete primary	1	1	1	1	1	Urban	Urban	Urban	Urban
467	-22.54268527	17.06121155	60401014	Khomasdal North	3	Male	35 - 39	0	0	0	0	0	0	Complete primary	1	1	1	1	1	Urban	Urban	Urban	Urban
468	-22.54263329	17.06139999	60401014	Khomasdal North	14	Male	45 - 49	0	1	1	0	1	1	Complete primary	1	1	1	0	0	Urban	Urban	Urban	Urban
469	-22.542376	17.05920417	60401014	Khomasdal North	5	Female	25 - 29	0	0	0	0	1	1	Complete primary	1	1	1	1	1	Urban	Urban	Urban	Urban
470	-22.54251383	17.05931283	60401014	Khomasdal North	5	Female	40 - 44	0	0	0	0	0	0	Incomplete primary	1	1	1	1	1	Urban	Urban	Urban	Urban
471	-22.54265928	17.05930116	60401014	Khomasdal North	4	Male	45 - 49	0	0	0	0	0	0	Complete secondary	1	1	1	1	1	Urban	Urban	Urban	Urban
472	-22.54280873	17.05933365	60401014	Khomasdal North	5	Male	35 - 39	0	0	1	0	1	0	Complete secondary	1	1	1	1	1	Urban	Urban	Urban	Urban
473	-22.54288833	17.05934417	60401014	Khomasdal North	9	Male	35 - 39	0	0	0	0	0	0	No formal	1	1	1	1	0	Urban	Urban	Urban	Urban
474	-22.54301767	17.0594605	60401014	Khomasdal North	3	Female	30 - 34	0	0	0	0	0	0	Complete tertiary	1	1	1	1	1	Urban	Urban	Urban	Urban
475	-22.54314662	17.05911272	60401014	Khomasdal North	4	Female	30 - 34	0	0	1	0	0	0	Complete secondary	1	1	1	1	1	Urban	Urban	Urban	Urban
476	-22.54304266	17.05904124	60401014	Khomasdal North	5	Female	35 - 39	0	0	0	0	0	1	Complete tertiary	1	1	1	1	1	Urban	Urban	Urban	Urban
477	-22.54300367	17.05912571	60401014	Khomasdal North	8	Male	55 - 59	0	0	0	0	0	0	Complete primary	1	1	1	1	1	Urban	Urban	Urban	Urban
478	-22.5429127	17.05902175	60401014	Khomasdal North	6	Female	40 - 44	0	0	0	0	0	1	Complete primary	1	1	1	1	1	Urban	Urban	Urban	Urban
479	-22.54285422	17.05919719	60401014	Khomasdal North	3	Female	40 - 44	0	0	0	0	0	0	Complete secondary	1	1	1	1	1	Urban	Urban	Urban	Urban
480	-22.54280223	17.05896976	60401014	Khomasdal North	6	Female	30 - 34	0	0	0	0	0	0	No formal	1	1	1	1	1	Urban	Urban	Urban	Urban
481	-22.54265278	17.05894377	60401014	Khomasdal North	3	Male	30 - 34	0	0	0	0	0	0	Complete primary	1	1	1	1	1	Urban	Urban	Urban	Urban
482	-22.54263329	17.05904124	60401014	Khomasdal North	5	Male	50 - 54	0	0	0	0	0	0	Complete tertiary	1	1	1	1	1	Urban	Urban	Urban	Urban
483	-22.5426073	17.05912571	60401014	Khomasdal North	2	Male	25 - 29	0	0	0	0	0	0	Complete primary	1	1	1	1	0	Urban	Urban	Urban	Urban
484	-22.54253582	17.05900225	60401014	Khomasdal North	5	Female	30 - 34	0	0	0	0	0	1	Complete secondary	1	1	1	1	1	Urban	Urban	Urban	Urban
485	-22.54249033	17.05911922	60401014	Khomasdal North	1	Female	30 - 34	0	0	0	0	0	0	Complete primary	1	1	1	1	1	Urban	Urban	Urban	Urban
486	-22.53811723	17.06087366	60401015	Khomasdal North	1	Male	30 - 34	0	0	0	0	0	0	Complete secondary	1	1	1	1	1	Urban	Urban	Urban	Urban
487	-22.5379028	17.06138049	60401015	Khomasdal North	2	Female	40 - 44	0	0	0	0	0	0	Complete secondary	1	1	1	1	1	Urban	Urban	Urban	Urban
488	-22.53803276	17.0613545	60401015	Khomasdal North	3	Female	25 - 29	0	0	0	0	0	0	Complete tertiary	1	1	1	1	1	Urban	Urban	Urban	Urban
489	-22.53816272	17.06126353	60401015	Khomasdal North	3	Female	45 - 49	0	0	0	0	0	0	Complete secondary	1	1	1	1	1	Urban	Urban	Urban	Urban
490	-22.53827318	17.06120505	60401015	Khomasdal North	3	Male	60 - 64	0	0	0	0	0	0	Complete secondary	1	1	1	1	1	Urban	Urban	Urban	Urban
491	-22.53837065	17.06114007	60401015	Khomasdal North	2	Female	25 - 29	0	0	0	0	0	0	Complete secondary	1	1	1	1	1	Urban	Urban	Urban	Urban
492	-22.53825369	17.06106859	60401015	Khomasdal North	5	Male	55 - 59	0	0	0	0	0	1	Incomplete primary	1	1	1	1	1	Urban	Urban	Urban	Urban
493	-22.53811723	17.06111408	60401015	Khomasdal North	2	Male	30 - 34	0	0	0	0	0	0	Complete tertiary	1	1	1	1	1	Urban	Urban	Urban	Urban
494	-22.53801326	17.06115956	60401015	Khomasdal North	2	Male	65 - 74	0	0	0	0	0	0	Complete primary	1	1	1	1	1	Urban	Urban	Urban	Urban
495	-22.53782482	17.06130252	60401015	Khomasdal North	2	Female	20 - 24	0	0	1	0	0	0	Complete tertiary	1	1	1	0	0	Urban	Urban	Urban	Urban
496	-22.53769487	17.05856689	60401015	Khomasdal North	1	Female	20 - 24	0	0	1	0	0	0	Complete tertiary	1	1	1	1	1	Urban	Urban	Urban	Urban
497	-22.53783132	17.05857339	60401015	Khomasdal North	7	Female	60 - 64	0	0	0	0	0	0	Complete primary	1	1	1	1	1	Urban	Urban	Urban	Urban
498	-22.53796778	17.05859938	60401015	Khomasdal North	6	Female	50 - 54	0	0	1	0	0	0	No formal	1	1	1	1	1	Urban	Urban	Urban	Urban
499	-22.5379158	17.05848242	60401015	Khomasdal North	3	Male	30 - 34	0	0	0	0	0	1	No formal	1	1	1	1	1	Urban	Urban	Urban	Urban
500	-22.53807824	17.05857989	60401015	Khomasdal North	1	Male	15 - 19	0	0	0	0	0	0	Complete secondary	1	1	1	1	1	Urban	Urban	Urban	Urban
501	-22.53824069	17.05859938	60401015	Khomasdal North	5	Female	45 - 49	0	0	0	0	0	0	Complete tertiary	1	1	1	0	0	Urban	Urban	Urban	Urban
502	-22.53834466	17.05860588	60401015	Khomasdal North	6	Female	30 - 34	0	0	0	0	0	1	Complete primary	1	1	1	1	1	Urban	Urban	Urban	Urban
503	-22.5385136	17.05860588	60401015	Khomasdal North	3	Female	35 - 39	0	0	0	0	0	0	Complete secondary	1	1	1	1	1	Urban	Urban	Urban	Urban
504	-22.53870854	17.05859938	60401015	Khomasdal North	3	Female	25 - 29	0	0	0	0	0	0	Complete secondary	1	1	1	1	1	Urban	Urban	Urban	Urban
505	-22.53859158	17.05846942	60401015	Khomasdal North	6	Male	30 - 34	0	0	0	0	1	1	Complete secondary	1	1	1	1	1	Urban	Urban	Urban	Urban
506	-22.53879951	17.05867086	60401015	Khomasdal North	6	Female	30 - 34	0	0	0	0	0	1	Complete tertiary	1	1	1	1	1	Urban	Urban	Urban	Urban
507	-22.53890348	17.05866436	60401015	Khomasdal North	3	Female	55 - 59	0	0	1	0	0	0	Complete primary	1	1	1	1	1	Urban	Urban	Urban	Urban
508	-22.53900095	17.05866436	60401015	Khomasdal North	3	Female	20 - 24	0	0	0	0	0	0	Complete tertiary	1	1	1	1	1	Urban	Urban	Urban	Urban
509	-22.5391569	17.05868386	60401015	Khomasdal North	3	Female	25 - 29	0	0	0	0	0	0	Complete tertiary	1	1	1	1	1	Urban	Urban	Urban	Urban
510	-22.53932584	17.05866436	60401015	Khomasdal North	5	Female	35 - 39	0	0	0	0	0	1	Complete primary	1	1	1	1	1	Urban	Urban	Urban	Urban
511	-22.53949479	17.05865786	60401015	Khomasdal North	3	Male	65 - 74	0	0	0	0	0	0	Complete primary	1	1	1	1	1	Urban	Urban	Urban	Urban
512	-22.53958576	17.05867736	60401015	Khomasdal North	6	Female	45 - 49	0	1	0	0	0	0	Complete tertiary	1	1	1	1	1	Urban	Urban	Urban	Urban
513	-22.53972222	17.05869685	60401015	Khomasdal North	5	Male	45 - 49	0	0	1	0	0	0	Complete secondary	1	1	1	1	1	Urban	Urban	Urban	Urban
514	-22.53981969	17.05870335	60401015	Khomasdal North	8	Male	60 - 64	0	0	1	0	1	0	Complete primary	1	1	1	1	0	Urban	Urban	Urban	Urban
515	-22.53994315	17.05870335	60401015	Khomasdal North	7	Male	60 - 64	0	0	0	0	1	0	Complete secondary	1	1	1	1	1	Urban	Urban	Urban	Urban
516	-22.53772736	17.0582225	60401015	Khomasdal North	9	Female	45 - 49	0	0	0	0	1	1	Complete secondary	1	1	1	1	0	Urban	Urban	Urban	Urban
517	-22.53784432	17.058242	60401015	Khomasdal North	4	Male	20 - 24	0	1	1	0	1	1	Complete secondary	1	1	1	1	1	Urban	Urban	Urban	Urban
518	-22.53800677	17.05826799	60401015	Khomasdal North	8	Male	55 - 59	0	0	0	0	1	1	Complete primary	1	1	1	1	1	Urban	Urban	Urban	Urban
519	-22.53812373	17.05826799	60401015	Khomasdal North	7	Female	30 - 34	0	0	0	0	1	1	Incomplete primary	1	1	1	1	1	Urban	Urban	Urban	Urban
520	-22.53824069	17.05826799	60401015	Khomasdal North	3	Female	25 - 29	0	0	0	0	0	1	Complete secondary	1	1	1	1	1	Urban	Urban	Urban	Urban
521	-22.53839664	17.05828098	60401015	Khomasdal North	4	Female	25 - 29	0	0	0	0	1	1	Complete tertiary	1	1	1	1	1	Urban	Urban	Urban	Urban
522	-22.5385266	17.05826799	60401015	Khomasdal North	4	Male	45 - 49	0	0	0	0	0	1	Complete secondary	1	1	1	1	1	Urban	Urban	Urban	Urban
523	-22.53868255	17.05828098	60401015	Khomasdal North	9	Female	20 - 24	0	0	0	0	0	1	Complete primary	1	1	1	1	1	Urban	Urban	Urban	Urban
524	-22.538845	17.05828748	60401015	Khomasdal North	6	Male	30 - 34	0	0	0	0	0	1	Complete primary	1	1	1	1	1	Urban	Urban	Urban	Urban
525	-22.53891648	17.05829398	60401015	Khomasdal North	4	Male	65 - 74	0	0	0	0	0	0	Complete primary	1	1	1	1	1	Urban	Urban	Urban	Urban
526	-22.53908542	17.05830048	60401015	Khomasdal North	10	Male	35 - 39	0	0	1	0	0	1	Complete primary	1	1	1	1	1	Urban	Urban	Urban	Urban
527	-22.53920238	17.05831997	60401015	Khomasdal North	4	Female	60 - 64	0	0	0	0	0	0	Incomplete primary	1	1	1	1	1	Urban	Urban	Urban	Urban
528	-22.53933234	17.05831347	60401015	Khomasdal North	4	Female	45 - 49	0	0	1	0	0	0	Complete tertiary	1	1	1	1	1	Urban	Urban	Urban	Urban
529	-22.5394688	17.05831347	60401015	Khomasdal North	6	Male	35 - 39	0	0	0	0	0	0	Complete secondary	1	1	1	1	1	Urban	Urban	Urban	Urban
530	-22.53959876	17.05831997	60401015	Khomasdal North	2	Female	30 - 34	0	0	0	0	0	0	Complete tertiary	1	1	1	1	1	Urban	Urban	Urban	Urban
531	-22.5397677	17.05833947	60401015	Khomasdal North	4	Male	25 - 29	0	0	1	0	0	0	Complete secondary	1	1	1	1	0	Urban	Urban	Urban	Urban
532	-22.53991066	17.05833947	60401015	Khomasdal North	1	Female	35 - 39	0	0	0	0	0	0	Complete secondary	1	1	1	1	1	Urban	Urban	Urban	Urban
533	-22.54002112	17.05835896	60401015	Khomasdal North	3	Male	35 - 39	0	0	0	0	0	0	Complete primary	1	1	1	1	1	Urban	Urban	Urban	Urban
534	-22.5375909	17.06047078	60401015	Khomasdal North	6	Male	40 - 44	0	0	1	0	0	1	Complete tertiary	1	1	1	1	1	Urban	Urban	Urban	Urban
535	-22.53765588	17.0604188	60401015	Khomasdal North	2	Female	20 - 24	0	0	1	0	0	0	Complete primary	1	1	1	1	1	Urban	Urban	Urban	Urban
536	-22.5376039	17.06023686	60401015	Khomasdal North	4	Male	60 - 64	0	0	0	0	0	0	Complete primary	1	1	1	1	1	Urban	Urban	Urban	Urban
537	-22.53771436	17.06021736	60401015	Khomasdal North	5	Male	35 - 39	0	0	0	0	0	1	Complete primary	1	1	1	1	0	Urban	Urban	Urban	Urban
538	-22.53764938	17.06013939	60401015	Khomasdal North	4	Female	40 - 44	0	0	1	0	1	0	Complete secondary	1	1	1	1	1	Urban	Urban	Urban	Urban
539	-22.53764938	17.05994445	60401015	Khomasdal North	4	Female	30 - 34	0	0	0	0	0	1	Complete primary	1	1	1	1	1	Urban	Urban	Urban	Urban
540	-22.5376039	17.05971702	60401015	Khomasdal North	8	Male	60 - 64	0	0	0	0	0	1	Complete secondary	1	1	1	1	1	Urban	Urban	Urban	Urban
541	-22.5375779	17.05952859	60401015	Khomasdal North	4	Female	25 - 29	0	0	0	0	1	1	Complete secondary	1	1	1	1	1	Urban	Urban	Urban	Urban
542	-22.5375495	17.05929767	60401015	Khomasdal North	3	Male	30 - 34	0	0	1	0	0	0	Complete secondary	1	1	1	1	1	Urban	Urban	Urban	Urban
543	-22.53751942	17.05921668	60401015	Khomasdal North	4	Female	35 - 39	0	0	1	0	1	1	Complete tertiary	1	1	1	1	1	Urban	Urban	Urban	Urban
544	-22.53748693	17.05908673	60401015	Khomasdal North	2	Female	20 - 24	0	0	0	0	0	0	Complete tertiary	1	1	1	1	1	Urban	Urban	Urban	Urban
545	-22.53826668	17.05895677	60401015	Khomasdal North	7	Male	40 - 44	0	0	0	0	0	0	Complete primary	1	1	1	1	1	Urban	Urban	Urban	Urban
546	-22.5382147	17.05911922	60401015	Khomasdal North	7	Male	40 - 44	0	0	0	0	0	0	Complete secondary	1	1	1	1	0	Urban	Urban	Urban	Urban
547	-22.53837065	17.05911272	60401015	Khomasdal North	4	Female	50 - 54	0	0	1	0	0	0	No formal	1	1	1	1	1	Urban	Urban	Urban	Urban
548	-22.53824719	17.05926867	60401015	Khomasdal North	1	Male	35 - 39	0	0	1	0	0	0	Complete primary	1	1	1	1	1	Urban	Urban	Urban	Urban
549	-22.53837065	17.05931415	60401015	Khomasdal North	5	Female	35 - 39	0	0	1	0	0	1	Complete secondary	1	1	1	1	1	Urban	Urban	Urban	Urban
550	-22.53823419	17.05946361	60401015	Khomasdal North	2	Male	20 - 24	0	0	0	0	0	0	Complete secondary	1	1	1	1	1	Urban	Urban	Urban	Urban
551	-22.53833816	17.05950909	60401015	Khomasdal North	9	Male	60 - 64	0	0	0	0	0	1	Complete primary	1	1	1	1	1	Urban	Urban	Urban	Urban
552	-22.53825369	17.05958707	60401015	Khomasdal North	1	Female	25 - 29	0	0	0	0	0	0	Complete secondary	1	1	1	1	1	Urban	Urban	Urban	Urban
553	-22.53837065	17.05959356	60401015	Khomasdal North	5	Male	45 - 49	0	0	1	0	0	0	Complete primary	1	1	1	1	1	Urban	Urban	Urban	Urban
554	-22.53827968	17.05974302	60401015	Khomasdal North	1	Male	Oct-14	0	1	0	0	0	0	Incomplete primary	1	1	1	1	1	Urban	Urban	Urban	Urban
555	-22.53837715	17.05974302	60401015	Khomasdal North	9	Male	50 - 54	0	0	0	0	0	0	Complete primary	1	1	1	1	1	Urban	Urban	Urban	Urban
556	-22.53827968	17.05993146	60401015	Khomasdal North	6	Male	40 - 44	0	0	0	0	0	1	Complete secondary	1	1	1	1	0	Urban	Urban	Urban	Urban
557	-22.53831217	17.06013289	60401015	Khomasdal North	1	Male	20 - 24	0	0	1	0	0	0	Complete primary	1	1	1	1	1	Urban	Urban	Urban	Urban
558	-22.53838365	17.06024985	60401015	Khomasdal North	2	Male	35 - 39	0	0	0	0	0	0	Complete tertiary	1	1	1	1	1	Urban	Urban	Urban	Urban
559	-22.53825369	17.06030184	60401015	Khomasdal North	1	Male	35 - 39	0	0	0	0	0	0	Complete tertiary	1	1	1	1	1	Urban	Urban	Urban	Urban
560	-22.53830567	17.06038631	60401015	Khomasdal North	8	Male	30 - 34	0	0	1	0	0	1	Complete tertiary	1	1	1	1	1	Urban	Urban	Urban	Urban
561	-22.5385136	17.06037332	60401015	Khomasdal North	3	Female	30 - 34	0	0	0	0	0	1	Complete primary	1	1	1	1	0	Urban	Urban	Urban	Urban
562	-22.53844933	17.06024883	60401015	Khomasdal North	1	Male	30 - 34	0	0	1	0	0	0	Complete primary	1	1	1	1	1	Urban	Urban	Urban	Urban
563	-22.538492	17.06017783	60401015	Khomasdal North	7	Female	40 - 44	0	1	0	0	0	0	Complete secondary	1	1	1	1	1	Urban	Urban	Urban	Urban
564	-22.5385396	17.06002243	60401015	Khomasdal North	4	Female	20 - 24	0	0	0	0	0	1	Complete secondary	1	1	1	1	1	Urban	Urban	Urban	Urban
565	-22.53848761	17.05989897	60401015	Khomasdal North	5	Female	35 - 39	0	1	1	0	1	1	Complete primary	1	1	1	1	1	Urban	Urban	Urban	Urban
566	-22.53859158	17.05977551	60401015	Khomasdal North	1	Female	20 - 24	0	0	1	0	0	0	Complete secondary	1	1	1	1	1	Urban	Urban	Urban	Urban
567	-22.53858508	17.05963905	60401015	Khomasdal North	2	Female	20 - 24	0	0	0	0	0	0	Complete secondary	1	1	1	1	1	Urban	Urban	Urban	Urban
568	-22.5385331	17.05953508	60401015	Khomasdal North	4	Male	40 - 44	0	1	0	0	0	0	Complete secondary	1	1	1	1	1	Urban	Urban	Urban	Urban
569	-22.53861757	17.05944411	60401015	Khomasdal North	6	Male	60 - 64	0	0	0	0	0	1	Complete primary	1	1	1	1	1	Urban	Urban	Urban	Urban
570	-22.5385935	17.05931217	60401015	Khomasdal North	6	Female	40 - 44	0	0	0	0	0	0	No formal	1	1	1	1	1	Urban	Urban	Urban	Urban
571	-22.53854609	17.0591842	60401015	Khomasdal North	2	Male	20 - 24	0	0	1	0	0	0	Complete primary	1	1	1	1	1	Urban	Urban	Urban	Urban
572	-22.5385396	17.05904124	60401015	Khomasdal North	4	Female	35 - 39	0	0	0	0	0	0	Complete secondary	1	1	1	1	1	Urban	Urban	Urban	Urban
573	-22.5385266	17.05895027	60401015	Khomasdal North	4	Female	20 - 24	0	0	0	0	1	1	Complete tertiary	1	1	1	1	1	Urban	Urban	Urban	Urban
574	-22.5385396	17.06065273	60401015	Khomasdal North	8	Male	50 - 54	0	0	0	0	0	1	Complete secondary	1	1	1	1	1	Urban	Urban	Urban	Urban
575	-22.53857858	17.0607177	60401015	Khomasdal North	2	Female	20 - 24	0	0	1	0	0	1	Complete secondary	1	1	1	1	1	Urban	Urban	Urban	Urban
576	-22.53861107	17.06082817	60401015	Khomasdal North	2	Male	20 - 24	0	0	1	0	0	0	Complete primary	1	1	1	1	0	Urban	Urban	Urban	Urban
577	-22.54136619	17.05535042	60401015	Khomasdal North	5	Female	25 - 29	0	0	0	0	0	1	Complete primary	1	1	1	1	1	Urban	Urban	Urban	Urban
578	-22.5413467	17.05516848	60401015	Khomasdal North	4	Female	60 - 64	0	0	0	0	0	0	Complete primary	1	1	1	1	1	Urban	Urban	Urban	Urban
579	-22.54128822	17.05503202	60401015	Khomasdal North	2	Male	50 - 54	0	0	1	0	0	0	Complete tertiary	1	1	1	1	0	Urban	Urban	Urban	Urban
580	-22.54127522	17.05486958	60401015	Khomasdal North	4	Male	40 - 44	0	0	0	0	1	0	Complete tertiary	1	1	1	1	1	Urban	Urban	Urban	Urban
581	-22.54130121	17.05469413	60401015	Khomasdal North	3	Female	25 - 29	0	0	0	0	0	0	Complete tertiary	1	1	1	1	1	Urban	Urban	Urban	Urban
582	-22.54128822	17.05457067	60401015	Khomasdal North	3	Female	30 - 34	0	0	0	0	0	0	Complete tertiary	1	1	1	1	1	Urban	Urban	Urban	Urban
583	-22.54127522	17.0544667	60401015	Khomasdal North	1	Male	25 - 29	0	0	0	0	0	0	Complete tertiary	1	1	1	1	1	Urban	Urban	Urban	Urban
584	-22.54124273	17.05432375	60401015	Khomasdal North	4	Male	45 - 49	0	0	0	0	0	1	Complete secondary	1	1	1	1	1	Urban	Urban	Urban	Urban
585	-22.54123623	17.0541678	60401015	Khomasdal North	3	Male	25 - 29	0	0	0	0	0	1	Complete tertiary	1	1	1	1	1	Urban	Urban	Urban	Urban
586	-22.54124273	17.05406383	60401015	Khomasdal North	7	Male	25 - 29	0	0	0	0	1	0	Complete secondary	1	1	1	1	1	Urban	Urban	Urban	Urban
587	-22.54124273	17.05392738	60401015	Khomasdal North	3	Female	35 - 39	0	0	0	0	0	0	Complete secondary	1	1	1	1	1	Urban	Urban	Urban	Urban
588	-22.54157413	17.05399236	60401015	Khomasdal North	1	Female	40 - 44	0	0	0	0	0	0	Complete tertiary	1	1	1	1	1	Urban	Urban	Urban	Urban
589	-22.54157413	17.0541678	60401015	Khomasdal North	4	Male	45 - 49	0	0	0	0	0	1	Complete primary	1	1	1	1	1	Urban	Urban	Urban	Urban
590	-22.54156763	17.05429126	60401015	Khomasdal North	4	Female	50 - 54	0	0	0	0	0	0	Complete primary	1	1	1	1	1	Urban	Urban	Urban	Urban
591	-22.54158712	17.05445371	60401015	Khomasdal North	5	Female	75+	0	0	0	0	0	0	Complete secondary	1	1	1	1	0	Urban	Urban	Urban	Urban
592	-22.54160012	17.05453818	60401015	Khomasdal North	1	Male	55 - 59	0	0	0	0	0	0	Complete primary	1	1	1	1	1	Urban	Urban	Urban	Urban
593	-22.54161311	17.05470063	60401015	Khomasdal North	4	Female	45 - 49	0	0	1	0	0	0	Complete secondary	1	1	1	1	1	Urban	Urban	Urban	Urban
594	-22.54159362	17.05485008	60401015	Khomasdal North	15	Male	50 - 54	0	0	0	0	1	1	Complete primary	1	1	1	1	1	Urban	Urban	Urban	Urban
595	-22.54163261	17.05502553	60401015	Khomasdal North	4	Male	30 - 34	0	0	1	0	0	0	Complete tertiary	1	1	1	1	1	Urban	Urban	Urban	Urban
596	-22.5416521	17.05512299	60401015	Khomasdal North	6	Male	30 - 34	0	0	0	0	0	0	Complete secondary	1	1	1	1	1	Urban	Urban	Urban	Urban
597	-22.54163261	17.05525295	60401015	Khomasdal North	2	Male	20 - 24	0	0	1	0	0	0	No formal	1	1	1	1	1	Urban	Urban	Urban	Urban
598	-22.53797704	17.05351551	60401016	Khomasdal North	2	Female	25 - 29	0	0	1	0	0	1	Complete secondary	1	1	1	1	1	Urban	Urban	Urban	Urban
599	-22.53777372	17.05354728	60401016	Khomasdal North	3	Male	30 - 34	0	0	1	0	0	1	Complete tertiary	1	1	1	1	1	Urban	Urban	Urban	Urban
600	-22.53773559	17.0533376	60401016	Khomasdal North	2	Male	20 - 24	0	0	0	0	0	0	Complete primary	1	1	1	1	1	Urban	Urban	Urban	Urban
601	-22.53767841	17.05315969	60401016	Khomasdal North	2	Female	20 - 24	0	0	0	0	0	0	Complete tertiary	1	1	1	1	0	Urban	Urban	Urban	Urban
602	-22.53767841	17.05290553	60401016	Khomasdal North	2	Male	55 - 59	0	0	0	0	0	1	Complete tertiary	1	1	1	1	1	Urban	Urban	Urban	Urban
603	-22.5378309	17.05291188	60401016	Khomasdal North	5	Male	45 - 49	0	0	0	0	0	0	Incomplete primary	1	1	1	1	1	Urban	Urban	Urban	Urban
604	-22.53798975	17.05288646	60401016	Khomasdal North	2	Female	30 - 34	0	0	0	0	0	1	Complete primary	1	1	1	1	1	Urban	Urban	Urban	Urban
605	-22.53817402	17.05299448	60401016	Khomasdal North	4	Female	35 - 39	0	0	1	0	0	0	Complete primary	1	1	1	1	1	Urban	Urban	Urban	Urban
606	-22.53683968	17.05198419	60401016	Khomasdal North	9	Female	20 - 24	0	0	0	0	1	1	Complete secondary	1	1	1	1	0	Urban	Urban	Urban	Urban
607	-22.53682697	17.0520668	60401016	Khomasdal North	16	Male	60 - 64	0	0	0	0	1	0	Incomplete primary	1	1	1	1	1	Urban	Urban	Urban	Urban
608	-22.53682061	17.05213669	60401016	Khomasdal North	8	Male	65 - 74	0	0	0	0	0	0	No formal	1	1	1	1	1	Urban	Urban	Urban	Urban
609	-22.53682697	17.05221294	60401016	Khomasdal North	7	Female	40 - 44	0	0	0	0	1	0	Complete tertiary	1	1	1	1	1	Urban	Urban	Urban	Urban
610	-22.53685238	17.05229554	60401016	Khomasdal North	4	Female	35 - 39	0	0	0	0	1	1	Complete primary	1	1	1	1	1	Urban	Urban	Urban	Urban
611	-22.53699217	17.05225742	60401016	Khomasdal North	4	Female	40 - 44	0	0	1	0	1	0	Complete primary	1	1	1	1	1	Urban	Urban	Urban	Urban
612	-22.53699853	17.05215575	60401016	Khomasdal North	5	Female	40 - 44	0	0	1	0	0	1	Complete primary	1	1	1	1	1	Urban	Urban	Urban	Urban
613	-22.53699853	17.05204138	60401016	Khomasdal North	2	Female	60 - 64	0	0	0	0	0	0	Complete secondary	1	1	1	1	1	Urban	Urban	Urban	Urban
614	-22.53687145	17.05235908	60401016	Khomasdal North	3	Male	35 - 39	0	0	0	0	0	1	Complete tertiary	1	1	1	1	1	Urban	Urban	Urban	Urban
615	-22.53698582	17.05235908	60401016	Khomasdal North	3	Female	25 - 29	0	0	0	0	0	1	Complete primary	1	1	1	1	1	Urban	Urban	Urban	Urban
616	-22.53691592	17.05255606	60401016	Khomasdal North	6	Female	50 - 54	0	1	0	0	0	0	Complete primary	1	1	1	1	1	Urban	Urban	Urban	Urban
617	-22.53689686	17.05267043	60401016	Khomasdal North	2	Female	65 - 74	0	0	0	0	0	0	Complete tertiary	1	1	1	1	1	Urban	Urban	Urban	Urban
618	-22.5370303	17.05267043	60401016	Khomasdal North	5	Male	30 - 34	0	0	1	0	0	1	Complete tertiary	1	1	1	1	1	Urban	Urban	Urban	Urban
619	-22.53696676	17.05285469	60401016	Khomasdal North	4	Female	40 - 44	0	0	0	0	0	0	Complete secondary	1	1	1	1	1	Urban	Urban	Urban	Urban
620	-22.53695405	17.05298177	60401016	Khomasdal North	6	Female	40 - 44	0	0	0	0	0	1	Complete tertiary	1	1	1	1	1	Urban	Urban	Urban	Urban
621	-22.53694769	17.05310885	60401016	Khomasdal North	3	Male	30 - 34	0	0	0	0	0	1	No formal	1	1	1	1	0	Urban	Urban	Urban	Urban
622	-22.53697311	17.05326771	60401016	Khomasdal North	1	Female	40 - 44	0	0	0	0	0	0	Complete secondary	1	1	1	1	1	Urban	Urban	Urban	Urban
623	-22.53697311	17.05339479	60401016	Khomasdal North	7	Female	25 - 29	0	0	1	0	1	1	Complete tertiary	1	1	1	1	1	Urban	Urban	Urban	Urban
624	-22.53699217	17.05356634	60401016	Khomasdal North	2	Male	55 - 59	0	0	0	0	0	0	Complete tertiary	1	1	1	1	0	Urban	Urban	Urban	Urban
625	-22.53698582	17.05369342	60401016	Khomasdal North	5	Female	40 - 44	0	0	1	0	0	1	Complete primary	1	1	1	1	1	Urban	Urban	Urban	Urban
626	-22.53706207	17.05388404	60401016	Khomasdal North	7	Male	45 - 49	0	0	0	0	1	1	No formal	1	1	1	1	1	Urban	Urban	Urban	Urban
627	-22.53708113	17.0540556	60401016	Khomasdal North	2	Male	30 - 34	0	0	0	0	0	0	Complete primary	1	1	1	1	1	Urban	Urban	Urban	Urban
628	-22.53710654	17.05424622	60401016	Khomasdal North	9	Female	55 - 59	0	0	1	0	1	1	Complete primary	1	1	1	1	1	Urban	Urban	Urban	Urban
629	-22.53713196	17.05437966	60401016	Khomasdal North	1	Female	25 - 29	0	0	1	0	0	0	Complete tertiary	1	1	1	1	1	Urban	Urban	Urban	Urban
630	-22.53740518	17.05437966	60401016	Khomasdal North	1	Male	20 - 24	0	0	0	0	0	0	Complete secondary	1	1	1	1	1	Urban	Urban	Urban	Urban
631	-22.53741154	17.05431612	60401016	Khomasdal North	2	Female	35 - 39	0	0	0	0	0	1	Complete secondary	1	1	1	1	1	Urban	Urban	Urban	Urban
632	-22.53741789	17.05421445	60401016	Khomasdal North	5	Female	40 - 44	0	0	0	0	0	1	Complete tertiary	1	1	1	1	1	Urban	Urban	Urban	Urban
633	-22.53741154	17.05410644	60401016	Khomasdal North	2	Female	25 - 29	0	1	0	0	0	1	Complete tertiary	1	1	1	1	1	Urban	Urban	Urban	Urban
634	-22.53741154	17.05410644	60401016	Khomasdal North	6	Male	45 - 49	0	0	0	0	1	1	Complete tertiary	1	1	1	1	1	Urban	Urban	Urban	Urban
635	-22.53740518	17.053973	60401016	Khomasdal North	8	Female	30 - 34	0	0	0	0	0	0	Complete secondary	1	1	1	1	1	Urban	Urban	Urban	Urban
636	-22.53737341	17.05381415	60401016	Khomasdal North	1	Male	30 - 34	0	0	0	0	0	0	Complete primary	1	1	1	1	0	Urban	Urban	Urban	Urban
637	-22.53736706	17.05367436	60401016	Khomasdal North	3	Male	35 - 39	0	0	0	0	0	0	Complete secondary	1	1	1	1	1	Urban	Urban	Urban	Urban
638	-22.53738612	17.05352822	60401016	Khomasdal North	4	Male	25 - 29	0	0	0	0	0	0	Complete primary	1	1	1	1	1	Urban	Urban	Urban	Urban
639	-22.53737341	17.05340749	60401016	Khomasdal North	5	Male	40 - 44	0	0	1	0	0	1	Complete primary	1	1	1	1	1	Urban	Urban	Urban	Urban
640	-22.53732894	17.05321052	60401016	Khomasdal North	7	Female	60 - 64	0	0	0	0	0	0	Complete tertiary	1	1	1	1	1	Urban	Urban	Urban	Urban
641	-22.53731623	17.05307708	60401016	Khomasdal North	5	Male	40 - 44	0	0	0	0	1	0	Complete tertiary	1	1	1	1	1	Urban	Urban	Urban	Urban
642	-22.53727175	17.05295636	60401016	Khomasdal North	2	Male	35 - 39	0	0	0	0	0	0	Complete secondary	1	1	1	1	1	Urban	Urban	Urban	Urban
643	-22.53730352	17.05282292	60401016	Khomasdal North	4	Female	50 - 54	0	0	0	0	0	0	No formal	1	1	1	1	1	Urban	Urban	Urban	Urban
644	-22.53729717	17.05260689	60401016	Khomasdal North	5	Male	25 - 29	0	0	0	0	0	0	Complete secondary	1	1	1	1	1	Urban	Urban	Urban	Urban
645	-22.53723998	17.05236544	60401016	Khomasdal North	1	Male	50 - 54	0	0	0	0	0	0	Complete secondary	1	1	1	1	1	Urban	Urban	Urban	Urban
646	-22.5372654	17.05226377	60401016	Khomasdal North	4	Male	30 - 34	0	0	1	0	0	1	Complete secondary	1	1	1	1	0	Urban	Urban	Urban	Urban
647	-22.53720821	17.05201596	60401016	Khomasdal North	7	Female	45 - 49	0	0	0	0	1	0	Complete primary	1	1	1	1	1	Urban	Urban	Urban	Urban
648	-22.53858703	17.05305802	60401016	Khomasdal North	1	Female	35 - 39	0	0	1	0	0	0	Complete primary	1	1	1	1	1	Urban	Urban	Urban	Urban
649	-22.53854891	17.05332489	60401016	Khomasdal North	5	Female	55 - 59	0	0	0	0	0	0	Complete secondary	1	1	1	1	1	Urban	Urban	Urban	Urban
650	-22.53851714	17.05344562	60401016	Khomasdal North	2	Male	35 - 39	0	1	0	0	0	0	Complete secondary	1	1	1	1	1	Urban	Urban	Urban	Urban
651	-22.53847266	17.05361082	60401016	Khomasdal North	5	Female	25 - 29	0	0	1	0	0	1	Complete primary	1	1	1	1	1	Urban	Urban	Urban	Urban
652	-22.53893015	17.05307708	60401016	Khomasdal North	1	Male	25 - 29	0	0	0	0	0	0	Complete primary	1	1	1	1	1	Urban	Urban	Urban	Urban
653	-22.53889838	17.05324229	60401016	Khomasdal North	5	Male	45 - 49	0	0	1	0	0	0	Complete primary	1	1	1	1	1	Urban	Urban	Urban	Urban
654	-22.53887296	17.05333125	60401016	Khomasdal North	8	Female	75+	0	0	0	0	0	1	No formal	1	1	1	0	0	Urban	Urban	Urban	Urban
655	-22.5388539	17.05352187	60401016	Khomasdal North	7	Male	35 - 39	0	0	1	0	1	1	Complete primary	1	1	1	1	1	Urban	Urban	Urban	Urban
656	-22.53882848	17.05373155	60401016	Khomasdal North	5	Female	45 - 49	0	0	0	0	0	0	Complete secondary	1	1	1	1	1	Urban	Urban	Urban	Urban
657	-22.53879671	17.05381415	60401016	Khomasdal North	6	Female	20 - 24	0	0	0	0	0	1	Complete secondary	1	1	1	1	1	Urban	Urban	Urban	Urban
658	-22.53877765	17.05392852	60401016	Khomasdal North	4	Male	45 - 49	0	0	0	0	1	1	Complete tertiary	1	1	1	1	1	Urban	Urban	Urban	Urban
659	-22.53876494	17.05417633	60401016	Khomasdal North	9	Female	55 - 59	0	0	0	0	1	1	Complete tertiary	1	1	1	1	1	Urban	Urban	Urban	Urban
660	-22.53852349	17.05426529	60401016	Khomasdal North	1	Male	35 - 39	0	0	0	0	0	0	Complete secondary	1	1	1	1	1	Urban	Urban	Urban	Urban
661	-22.53839006	17.05427164	60401016	Khomasdal North	2	Female	55 - 59	0	0	0	0	0	0	Complete primary	1	1	1	1	1	Urban	Urban	Urban	Urban
662	-22.53828839	17.05429706	60401016	Khomasdal North	5	Female	40 - 44	0	0	0	0	1	0	Complete secondary	1	1	1	1	1	Urban	Urban	Urban	Urban
663	-22.53809777	17.05429706	60401016	Khomasdal North	3	Male	40 - 44	0	0	0	0	0	0	Incomplete primary	1	1	1	1	1	Urban	Urban	Urban	Urban
664	-22.5379008	17.0543733	60401016	Khomasdal North	6	Male	35 - 39	0	0	0	0	0	1	No formal	1	1	1	1	1	Urban	Urban	Urban	Urban
665	-22.53804058	17.05420175	60401016	Khomasdal North	2	Male	20 - 24	0	0	0	0	0	0	Complete secondary	1	1	1	1	0	Urban	Urban	Urban	Urban
666	-22.53788809	17.05421445	60401016	Khomasdal North	7	Female	60 - 64	0	0	0	0	0	0	Complete secondary	1	1	1	1	1	Urban	Urban	Urban	Urban
667	-22.53772288	17.05410644	60401016	Khomasdal North	10	Female	30 - 34	0	0	0	0	1	1	Complete primary	1	1	1	1	1	Urban	Urban	Urban	Urban
668	-22.53778642	17.05411279	60401016	Khomasdal North	1	Female	20 - 24	0	0	0	0	0	0	Complete secondary	1	1	1	1	1	Urban	Urban	Urban	Urban
669	-22.53786267	17.0541255	60401016	Khomasdal North	6	Female	50 - 54	0	0	0	0	0	0	Complete secondary	1	1	1	1	1	Urban	Urban	Urban	Urban
670	-22.53771018	17.05399842	60401016	Khomasdal North	4	Male	40 - 44	0	0	0	0	1	0	Complete tertiary	1	1	1	1	1	Urban	Urban	Urban	Urban
671	-22.53771018	17.05399842	60401016	Khomasdal North	1	Female	25 - 29	0	0	1	0	0	0	Complete primary	1	1	1	1	1	Urban	Urban	Urban	Urban
672	-22.53740518	17.05474819	60401016	Khomasdal North	6	Male	40 - 44	0	0	0	0	0	1	Complete secondary	1	1	1	0	0	Urban	Urban	Urban	Urban
673	-22.53753226	17.05476725	60401016	Khomasdal North	4	Female	45 - 49	0	0	0	0	0	0	Complete secondary	1	1	1	1	1	Urban	Urban	Urban	Urban
674	-22.53769111	17.05471642	60401016	Khomasdal North	3	Female	30 - 34	0	0	0	0	0	0	Complete primary	1	1	1	1	1	Urban	Urban	Urban	Urban
675	-22.53780549	17.05473548	60401016	Khomasdal North	3	Female	20 - 24	0	0	0	0	0	0	Complete primary	1	1	1	1	1	Urban	Urban	Urban	Urban
676	-22.53795163	17.05472913	60401016	Khomasdal North	7	Female	45 - 49	0	0	0	0	0	1	Complete primary	1	1	1	1	1	Urban	Urban	Urban	Urban
677	-22.53807235	17.05471642	60401016	Khomasdal North	5	Male	40 - 44	0	0	0	0	0	0	Complete tertiary	1	1	1	1	1	Urban	Urban	Urban	Urban
678	-22.53823121	17.054691	60401016	Khomasdal North	9	Female	20 - 24	0	0	0	0	0	1	Complete primary	1	1	1	1	1	Urban	Urban	Urban	Urban
679	-22.53833287	17.05468465	60401016	Khomasdal North	2	Male	40 - 44	0	0	1	0	0	0	Complete tertiary	1	1	1	1	1	Urban	Urban	Urban	Urban
680	-22.53851078	17.0546783	60401016	Khomasdal North	1	Male	20 - 24	0	0	1	0	0	0	Complete primary	1	1	1	1	1	Urban	Urban	Urban	Urban
681	-22.53860609	17.05467194	60401016	Khomasdal North	4	Female	30 - 34	0	0	0	0	0	0	Complete tertiary	1	1	1	1	1	Urban	Urban	Urban	Urban
682	-22.53882848	17.0546783	60401016	Khomasdal North	2	Male	25 - 29	0	0	0	0	0	0	Complete primary	1	1	1	1	1	Urban	Urban	Urban	Urban
683	-22.53892379	17.05465923	60401016	Khomasdal North	5	Male	35 - 39	0	0	0	0	1	1	Complete primary	1	1	1	1	1	Urban	Urban	Urban	Urban
684	-22.5389365	17.0544432	60401016	Khomasdal North	1	Male	35 - 39	0	0	1	0	0	0	Complete primary	1	1	1	1	1	Urban	Urban	Urban	Urban
685	-22.53900004	17.05455122	60401016	Khomasdal North	3	Female	60 - 64	0	0	0	0	0	1	Complete primary	1	1	1	1	1	Urban	Urban	Urban	Urban
686	-22.53898733	17.0542907	60401016	Khomasdal North	2	Male	20 - 24	0	0	1	0	0	0	Complete primary	1	1	1	1	1	Urban	Urban	Urban	Urban
687	-22.53901275	17.05411914	60401016	Khomasdal North	8	Male	55 - 59	0	0	0	0	1	1	Complete tertiary	1	1	1	1	0	Urban	Urban	Urban	Urban
688	-22.53904452	17.05400477	60401016	Khomasdal North	1	Male	45 - 49	0	0	0	0	0	0	Complete primary	1	1	1	1	1	Urban	Urban	Urban	Urban
689	-22.539089	17.05388404	60401016	Khomasdal North	5	Female	60 - 64	0	0	0	0	0	1	Complete tertiary	1	1	1	1	1	Urban	Urban	Urban	Urban
690	-22.53912077	17.05370613	60401016	Khomasdal North	1	Male	35 - 39	0	0	1	0	0	0	Complete secondary	1	1	1	1	0	Urban	Urban	Urban	Urban
691	-22.5391716	17.05355999	60401016	Khomasdal North	4	Female	40 - 44	0	0	0	0	0	1	Complete primary	1	1	1	1	1	Urban	Urban	Urban	Urban
692	-22.53920337	17.05338208	60401016	Khomasdal North	5	Male	45 - 49	0	0	0	0	0	0	Complete tertiary	1	1	1	1	1	Urban	Urban	Urban	Urban
693	-22.5392542	17.05330583	60401016	Khomasdal North	2	Male	20 - 24	0	0	0	0	0	0	Incomplete primary	1	1	1	1	1	Urban	Urban	Urban	Urban
694	-22.53929868	17.05322958	60401016	Khomasdal North	8	Female	40 - 44	0	0	0	0	0	0	Complete primary	1	1	1	1	1	Urban	Urban	Urban	Urban
695	-22.53954013	17.05322323	60401016	Khomasdal North	5	Male	40 - 44	0	0	0	0	0	0	Complete tertiary	1	1	1	1	1	Urban	Urban	Urban	Urban
696	-22.53959732	17.05338843	60401016	Khomasdal North	5	Male	55 - 59	0	0	0	0	0	0	Complete tertiary	1	1	1	1	1	Urban	Urban	Urban	Urban
697	-22.5395719	17.05351551	60401016	Khomasdal North	2	Female	65 - 74	0	0	0	0	0	0	No formal	1	1	1	1	1	Urban	Urban	Urban	Urban
698	-22.53953378	17.05364259	60401016	Khomasdal North	2	Female	45 - 49	0	0	0	0	0	0	Complete secondary	1	1	1	1	1	Urban	Urban	Urban	Urban
699	-22.53951472	17.05375061	60401016	Khomasdal North	11	Female	15 - 19	0	0	0	0	0	1	Complete primary	1	1	1	1	1	Urban	Urban	Urban	Urban
700	-22.53945118	17.05392852	60401016	Khomasdal North	1	Male	40 - 44	0	0	0	0	0	0	Complete primary	1	1	1	1	1	Urban	Urban	Urban	Urban
701	-22.53942576	17.05411279	60401016	Khomasdal North	4	Male	35 - 39	0	0	0	0	0	0	Complete secondary	1	1	1	1	1	Urban	Urban	Urban	Urban
702	-22.53936857	17.05422716	60401016	Khomasdal North	1	Female	15 - 19	0	0	0	0	0	0	Complete primary	1	1	1	1	1	Urban	Urban	Urban	Urban
703	-22.53934951	17.0543733	60401016	Khomasdal North	5	Male	50 - 54	0	0	0	0	0	1	Complete primary	1	1	1	1	1	Urban	Urban	Urban	Urban
704	-22.53922243	17.05438601	60401016	Khomasdal North	6	Female	35 - 39	0	0	0	0	0	1	Incomplete primary	1	1	1	1	1	Urban	Urban	Urban	Urban
705	-22.53929868	17.05450674	60401016	Khomasdal North	4	Male	40 - 44	0	0	0	0	0	0	Complete primary	1	1	1	1	1	Urban	Urban	Urban	Urban
706	-22.53929233	17.05464017	60401016	Khomasdal North	5	Female	30 - 34	0	0	0	0	1	1	Complete primary	1	1	1	1	0	Urban	Urban	Urban	Urban
707	-22.53922243	17.05479267	60401016	Khomasdal North	6	Male	40 - 44	0	0	1	0	0	0	Complete tertiary	1	1	1	1	1	Urban	Urban	Urban	Urban
708	-22.53913348	17.05490069	60401016	Khomasdal North	3	Female	25 - 29	0	0	1	0	0	0	Complete secondary	1	1	1	1	0	Urban	Urban	Urban	Urban
709	-22.53894921	17.05491975	60401016	Khomasdal North	2	Female	25 - 29	0	0	1	0	0	1	Complete tertiary	1	1	1	1	1	Urban	Urban	Urban	Urban
710	-22.53877765	17.05498964	60401016	Khomasdal North	7	Male	40 - 44	0	0	0	0	0	0	Complete primary	1	1	1	1	1	Urban	Urban	Urban	Urban
711	-22.53867599	17.05497694	60401016	Khomasdal North	3	Male	20 - 24	0	0	0	0	0	1	Complete primary	1	1	1	1	1	Urban	Urban	Urban	Urban
712	-22.53851078	17.054996	60401016	Khomasdal North	2	Female	50 - 54	0	0	0	0	0	0	Complete secondary	1	1	1	1	1	Urban	Urban	Urban	Urban
713	-22.53840912	17.05502141	60401016	Khomasdal North	6	Female	25 - 29	0	0	0	0	0	0	Complete primary	1	1	1	1	1	Urban	Urban	Urban	Urban
714	-22.53826933	17.05503412	60401016	Khomasdal North	4	Male	35 - 39	0	0	0	0	0	0	Complete primary	1	1	1	1	1	Urban	Urban	Urban	Urban
715	-22.53811048	17.05504048	60401016	Khomasdal North	2	Female	45 - 49	0	0	0	0	0	0	Complete tertiary	1	1	1	1	1	Urban	Urban	Urban	Urban
716	-22.53797704	17.05504048	60401016	Khomasdal North	1	Female	35 - 39	0	0	0	0	0	0	Complete primary	1	1	1	1	1	Urban	Urban	Urban	Urban
717	-22.53786267	17.05506589	60401016	Khomasdal North	1	Male	40 - 44	0	0	1	0	0	0	Complete primary	1	1	1	1	1	Urban	Urban	Urban	Urban
718	-22.53783726	17.05496423	60401016	Khomasdal North	8	Male	55 - 59	0	0	0	0	0	0	Complete primary	1	1	1	1	1	Urban	Urban	Urban	Urban
719	-22.53773559	17.05507225	60401016	Khomasdal North	5	Female	30 - 34	0	0	0	0	1	1	Complete tertiary	1	1	1	1	1	Urban	Urban	Urban	Urban
720	-22.5375831	17.05508495	60401016	Khomasdal North	9	Male	50 - 54	0	0	0	0	0	0	Complete tertiary	1	1	1	1	1	Urban	Urban	Urban	Urban
721	-22.5374306	17.05511037	60401016	Khomasdal North	3	Female	20 - 24	0	0	1	0	0	0	Complete secondary	1	1	1	1	1	Urban	Urban	Urban	Urban
722	-22.53649579	17.04789962	60401017	Khomasdal North	4	Female	25 - 29	0	0	1	0	0	1	Complete primary	1	1	1	1	1	Urban	Urban	Urban	Urban
723	-22.53649579	17.04798072	60401017	Khomasdal North	3	Female	35 - 39	0	0	0	0	0	0	Complete primary	1	1	1	1	1	Urban	Urban	Urban	Urban
724	-22.53652283	17.04820781	60401017	Khomasdal North	4	Male	20 - 24	0	0	0	0	0	0	Complete tertiary	1	1	1	1	1	Urban	Urban	Urban	Urban
725	-22.53652823	17.04832676	60401017	Khomasdal North	6	Male	35 - 39	0	0	0	0	0	0	No formal	1	1	1	1	1	Urban	Urban	Urban	Urban
726	-22.53656608	17.04847274	60401017	Khomasdal North	8	Male	65 - 74	0	0	0	0	0	0	No formal	1	1	1	1	0	Urban	Urban	Urban	Urban
727	-22.53657149	17.04860791	60401017	Khomasdal North	9	Female	60 - 64	0	0	0	0	0	1	Complete primary	1	1	1	1	1	Urban	Urban	Urban	Urban
728	-22.53659312	17.04872686	60401017	Khomasdal North	1	Female	15 - 19	0	0	0	0	0	0	Complete primary	1	1	1	1	1	Urban	Urban	Urban	Urban
729	-22.53663096	17.04886744	60401017	Khomasdal North	4	Female	35 - 39	0	0	0	0	0	0	Complete primary	1	1	1	1	0	Urban	Urban	Urban	Urban
730	-22.5365823	17.04911075	60401017	Khomasdal North	6	Female	30 - 34	0	0	0	0	1	0	Complete tertiary	1	1	1	1	1	Urban	Urban	Urban	Urban
731	-22.53657689	17.04922429	60401017	Khomasdal North	2	Male	25 - 29	0	1	1	0	0	0	Complete tertiary	2	1	1	1	1	Urban	Urban	Urban	Urban
732	-22.53659312	17.04932702	60401017	Khomasdal North	1	Male	25 - 29	0	0	1	0	0	0	Complete primary	1	1	1	1	1	Urban	Urban	Urban	Urban
733	-22.53663096	17.04945678	60401017	Khomasdal North	6	Male	60 - 64	0	0	0	0	0	1	Incomplete primary	1	1	1	1	1	Urban	Urban	Urban	Urban
734	-22.536658	17.04965683	60401017	Khomasdal North	6	Female	50 - 54	0	0	1	0	0	0	Complete primary	1	1	1	1	1	Urban	Urban	Urban	Urban
735	-22.53663637	17.04976497	60401017	Khomasdal North	3	Female	25 - 29	0	0	0	0	0	0	Complete primary	1	1	1	1	1	Urban	Urban	Urban	Urban
736	-22.5366634	17.04988392	60401017	Khomasdal North	1	Male	20 - 24	0	0	1	0	0	0	Complete secondary	1	1	1	1	1	Urban	Urban	Urban	Urban
737	-22.53669044	17.05005153	60401017	Khomasdal North	2	Male	35 - 39	0	0	1	0	0	0	No formal	1	1	1	1	1	Urban	Urban	Urban	Urban
738	-22.53670666	17.05018129	60401017	Khomasdal North	4	Male	30 - 34	0	0	0	0	0	1	Complete primary	1	1	1	1	1	Urban	Urban	Urban	Urban
739	-22.53677154	17.05032187	60401017	Khomasdal North	3	Female	40 - 44	0	0	0	0	0	1	Complete secondary	1	1	1	1	1	Urban	Urban	Urban	Urban
740	-22.53680939	17.04786177	60401017	Khomasdal North	5	Female	30 - 34	0	0	0	0	0	1	Complete tertiary	1	1	1	1	1	Urban	Urban	Urban	Urban
741	-22.53682561	17.04794828	60401017	Khomasdal North	5	Female	40 - 44	0	0	0	0	0	1	Complete tertiary	1	1	1	1	0	Urban	Urban	Urban	Urban
742	-22.53687427	17.04815374	60401017	Khomasdal North	5	Female	45 - 49	0	0	0	0	1	1	Complete tertiary	1	1	1	1	1	Urban	Urban	Urban	Urban
743	-22.53689049	17.0482835	60401017	Khomasdal North	4	Female	30 - 34	0	0	0	0	0	1	Complete primary	1	1	1	1	1	Urban	Urban	Urban	Urban
744	-22.53691212	17.04842408	60401017	Khomasdal North	4	Female	40 - 44	0	0	0	0	0	1	Complete secondary	1	1	1	1	1	Urban	Urban	Urban	Urban
745	-22.53692293	17.04861332	60401017	Khomasdal North	3	Female	55 - 59	0	0	0	0	0	0	Complete primary	1	1	1	1	1	Urban	Urban	Urban	Urban
746	-22.53691212	17.04874308	60401017	Khomasdal North	3	Male	30 - 34	0	0	1	0	0	0	Complete tertiary	1	1	1	1	1	Urban	Urban	Urban	Urban
747	-22.53691212	17.04886203	60401017	Khomasdal North	2	Female	25 - 29	0	0	1	0	0	0	Complete tertiary	1	1	1	1	1	Urban	Urban	Urban	Urban
748	-22.5369013	17.04900802	60401017	Khomasdal North	3	Male	40 - 44	0	0	0	0	0	0	No formal	1	1	1	1	0	Urban	Urban	Urban	Urban
749	-22.53692834	17.04914319	60401017	Khomasdal North	2	Male	25 - 29	0	0	0	0	0	0	Complete primary	1	1	1	1	1	Urban	Urban	Urban	Urban
750	-22.53694996	17.04929458	60401017	Khomasdal North	3	Female	50 - 54	0	0	0	0	0	0	Complete secondary	1	1	1	1	1	Urban	Urban	Urban	Urban
751	-22.53694456	17.04941353	60401017	Khomasdal North	1	Male	35 - 39	0	0	0	0	0	0	Complete primary	1	1	1	1	1	Urban	Urban	Urban	Urban
752	-22.53696619	17.04961358	60401017	Khomasdal North	2	Female	40 - 44	0	0	1	0	0	0	Complete secondary	1	1	1	1	1	Urban	Urban	Urban	Urban
753	-22.53699863	17.0497109	60401017	Khomasdal North	4	Male	30 - 34	0	0	0	0	0	0	Complete primary	1	1	1	1	1	Urban	Urban	Urban	Urban
754	-22.53704729	17.04988392	60401017	Khomasdal North	2	Male	20 - 24	0	0	0	0	0	0	Complete secondary	1	1	1	1	1	Urban	Urban	Urban	Urban
755	-22.53704729	17.05004072	60401017	Khomasdal North	5	Male	50 - 54	0	0	0	0	1	1	Complete tertiary	1	1	1	1	1	Urban	Urban	Urban	Urban
756	-22.53707432	17.05012182	60401017	Khomasdal North	4	Female	35 - 39	0	0	0	0	0	0	Complete secondary	1	1	1	1	0	Urban	Urban	Urban	Urban
757	-22.5370581	17.05034891	60401017	Khomasdal North	2	Male	20 - 24	0	0	1	0	0	0	Complete secondary	1	1	1	1	1	Urban	Urban	Urban	Urban
758	-22.53682561	17.05079767	60401017	Khomasdal North	4	Female	20 - 24	0	0	0	0	0	0	Complete primary	1	1	1	1	1	Urban	Urban	Urban	Urban
759	-22.53700944	17.05078686	60401017	Khomasdal North	2	Male	30 - 34	0	0	0	0	0	0	Complete secondary	1	1	1	1	1	Urban	Urban	Urban	Urban
760	-22.53717164	17.05076523	60401017	Khomasdal North	5	Female	20 - 24	0	0	0	0	0	0	Complete secondary	1	1	1	1	1	Urban	Urban	Urban	Urban
761	-22.53740414	17.05074901	60401017	Khomasdal North	2	Female	20 - 24	0	0	0	0	0	1	Complete secondary	1	1	1	1	1	Urban	Urban	Urban	Urban
762	-22.53744198	17.05090581	60401017	Khomasdal North	2	Male	20 - 24	0	0	0	0	0	0	Complete secondary	1	1	1	1	1	Urban	Urban	Urban	Urban
763	-22.53765826	17.05080848	60401017	Khomasdal North	2	Male	30 - 34	0	0	1	0	0	0	Complete tertiary	1	1	1	1	1	Urban	Urban	Urban	Urban
764	-22.53766907	17.05092743	60401017	Khomasdal North	5	Male	40 - 44	0	1	0	0	0	0	Complete primary	1	1	1	1	1	Urban	Urban	Urban	Urban
765	-22.53788534	17.05080308	60401017	Khomasdal North	7	Male	55 - 59	0	0	0	0	0	1	Incomplete primary	1	1	1	1	1	Urban	Urban	Urban	Urban
766	-22.53788534	17.05094906	60401017	Khomasdal North	4	Male	35 - 39	0	0	1	0	0	0	Complete primary	1	1	1	1	1	Urban	Urban	Urban	Urban
767	-22.53803133	17.0508193	60401017	Khomasdal North	4	Male	60 - 64	0	0	0	0	0	0	Complete primary	1	1	1	1	0	Urban	Urban	Urban	Urban
768	-22.53803673	17.0509761	60401017	Khomasdal North	4	Female	30 - 34	0	0	0	0	0	0	Complete primary	1	1	1	1	1	Urban	Urban	Urban	Urban
769	-22.53823679	17.05078686	60401017	Khomasdal North	2	Male	45 - 49	0	0	0	0	0	0	Complete primary	1	1	1	1	1	Urban	Urban	Urban	Urban
770	-22.53823679	17.05099232	60401017	Khomasdal North	6	Male	50 - 54	1	0	0	0	0	0	Complete secondary	1	1	1	1	1	Urban	Urban	Urban	Urban
771	-22.53841521	17.05077604	60401017	Khomasdal North	4	Male	40 - 44	0	0	0	0	0	0	Complete secondary	1	1	1	1	0	Urban	Urban	Urban	Urban
772	-22.53838818	17.05099772	60401017	Khomasdal North	7	Male	40 - 44	0	0	0	0	0	0	Complete primary	1	1	1	1	1	Urban	Urban	Urban	Urban
773	-22.5393614	17.05080848	60401017	Khomasdal North	3	Female	55 - 59	0	0	0	0	0	0	Complete secondary	1	1	1	1	1	Urban	Urban	Urban	Urban
774	-22.5393614	17.05104638	60401017	Khomasdal North	2	Female	25 - 29	0	0	0	0	0	0	Complete primary	1	1	1	1	1	Urban	Urban	Urban	Urban
775	-22.53944791	17.05104638	60401017	Khomasdal North	2	Male	30 - 34	0	0	0	0	0	0	Complete tertiary	1	1	1	1	1	Urban	Urban	Urban	Urban
776	-22.53751227	17.05212234	60401017	Khomasdal North	7	Female	30 - 34	0	0	1	0	1	1	Complete primary	1	1	1	1	1	Urban	Urban	Urban	Urban
777	-22.53770151	17.05218181	60401017	Khomasdal North	7	Female	55 - 59	0	0	0	0	1	1	Complete primary	1	1	1	1	1	Urban	Urban	Urban	Urban
778	-22.53781505	17.05222507	60401017	Khomasdal North	1	Male	30 - 34	0	0	0	0	0	0	Complete tertiary	1	1	1	1	1	Urban	Urban	Urban	Urban
779	-22.53798807	17.05222507	60401017	Khomasdal North	8	Male	45 - 49	0	0	0	0	0	0	Complete primary	1	1	1	1	1	Urban	Urban	Urban	Urban
780	-22.53811243	17.0522521	60401017	Khomasdal North	4	Female	35 - 39	0	0	0	0	0	1	Complete secondary	1	1	1	1	1	Urban	Urban	Urban	Urban
781	-22.53827463	17.0522521	60401017	Khomasdal North	2	Male	25 - 29	0	0	1	0	0	0	Complete primary	1	1	1	1	1	Urban	Urban	Urban	Urban
782	-22.53836114	17.05227373	60401017	Khomasdal North	2	Male	20 - 24	0	0	0	0	0	0	Complete primary	1	1	1	1	1	Urban	Urban	Urban	Urban
783	-22.53852875	17.05230617	60401017	Khomasdal North	9	Female	35 - 39	0	0	0	0	0	1	Complete secondary	1	1	1	1	1	Urban	Urban	Urban	Urban
784	-22.5386423	17.05230617	60401017	Khomasdal North	7	Male	40 - 44	0	0	0	0	0	0	Complete primary	1	1	1	1	1	Urban	Urban	Urban	Urban
785	-22.53879369	17.0523278	60401017	Khomasdal North	2	Male	60 - 64	0	0	1	0	0	0	No formal	1	1	1	1	1	Urban	Urban	Urban	Urban
786	-22.53892345	17.05234943	60401017	Khomasdal North	9	Male	45 - 49	0	0	0	0	1	1	Complete secondary	1	1	1	1	1	Urban	Urban	Urban	Urban
787	-22.53903159	17.05237646	60401017	Khomasdal North	3	Male	35 - 39	0	0	0	0	0	0	Complete primary	1	1	1	1	1	Urban	Urban	Urban	Urban
788	-22.53762041	17.05245756	60401017	Khomasdal North	6	Female	30 - 34	0	0	1	0	1	1	Complete primary	1	1	1	1	1	Urban	Urban	Urban	Urban
789	-22.53782046	17.05257111	60401017	Khomasdal North	2	Female	45 - 49	0	0	0	0	0	0	Complete secondary	1	1	1	1	0	Urban	Urban	Urban	Urban
790	-22.5379286	17.0525657	60401017	Khomasdal North	3	Female	75+	0	0	1	0	0	1	Complete tertiary	1	1	1	1	0	Urban	Urban	Urban	Urban
791	-22.53812865	17.05262517	60401017	Khomasdal North	8	Male	45 - 49	0	0	0	0	0	1	Complete secondary	1	1	1	1	1	Urban	Urban	Urban	Urban
792	-22.53828004	17.05261977	60401017	Khomasdal North	3	Female	40 - 44	0	0	0	0	0	1	Incomplete primary	1	1	1	1	1	Urban	Urban	Urban	Urban
793	-22.53837196	17.05263058	60401017	Khomasdal North	4	Female	45 - 49	0	0	0	0	0	0	Complete primary	1	1	1	1	1	Urban	Urban	Urban	Urban
794	-22.53848009	17.05264139	60401017	Khomasdal North	5	Male	50 - 54	0	0	0	0	0	0	Complete tertiary	1	1	1	1	1	Urban	Urban	Urban	Urban
795	-22.53861526	17.05269546	60401017	Khomasdal North	1	Male	30 - 34	0	0	0	0	0	0	Complete tertiary	1	1	1	1	1	Urban	Urban	Urban	Urban
796	-22.5388045	17.05270087	60401017	Khomasdal North	1	Female	25 - 29	0	0	0	0	0	0	Complete tertiary	1	1	1	1	1	Urban	Urban	Urban	Urban
797	-22.53889642	17.05270087	60401017	Khomasdal North	1	Male	30 - 34	0	0	0	0	0	0	Complete secondary	1	1	1	1	1	Urban	Urban	Urban	Urban
798	-22.53901537	17.05274953	60401017	Khomasdal North	2	Female	55 - 59	0	0	0	0	0	0	Complete tertiary	1	1	1	1	1	Urban	Urban	Urban	Urban
799	-22.5391235	17.05281982	60401017	Khomasdal North	8	Female	50 - 54	0	0	0	0	0	1	Complete primary	1	1	1	1	1	Urban	Urban	Urban	Urban
800	-22.53926408	17.05281982	60401017	Khomasdal North	4	Male	40 - 44	0	0	0	0	1	0	Complete secondary	1	1	1	1	1	Urban	Urban	Urban	Urban
801	-22.53939384	17.05283604	60401017	Khomasdal North	7	Male	65 - 74	0	0	0	0	1	1	Incomplete primary	1	1	1	1	1	Urban	Urban	Urban	Urban
802	-22.53953442	17.05284145	60401017	Khomasdal North	2	Male	35 - 39	0	0	1	0	0	0	Complete secondary	1	1	1	1	1	Urban	Urban	Urban	Urban
803	-22.53964796	17.05286848	60401017	Khomasdal North	6	Male	45 - 49	0	0	1	0	1	0	Complete tertiary	1	1	1	1	1	Urban	Urban	Urban	Urban
804	-22.53985883	17.05249	60401017	Khomasdal North	9	Male	35 - 39	0	0	0	0	0	0	Complete tertiary	1	1	1	1	1	Urban	Urban	Urban	Urban
805	-22.53985883	17.05249	60401017	Khomasdal North	1	Male	25 - 29	0	0	0	0	0	0	Complete secondary	1	1	1	1	1	Urban	Urban	Urban	Urban
806	-22.53992912	17.05250622	60401017	Khomasdal North	1	Male	25 - 29	0	0	1	0	0	0	Complete tertiary	1	1	1	1	1	Urban	Urban	Urban	Urban
807	-22.54001022	17.05251704	60401017	Khomasdal North	1	Male	35 - 39	0	0	1	0	0	0	Complete tertiary	1	1	1	1	0	Urban	Urban	Urban	Urban
808	-22.54009673	17.05251704	60401017	Khomasdal North	2	Female	20 - 24	0	0	0	0	0	0	No formal	1	1	1	1	1	Urban	Urban	Urban	Urban
809	-22.54009673	17.05251704	60401017	Khomasdal North	5	Male	30 - 34	0	0	0	0	0	1	Complete tertiary	1	1	1	1	0	Urban	Urban	Urban	Urban
810	-22.53989668	17.05263058	60401017	Khomasdal North	7	Female	35 - 39	0	0	0	0	1	1	Complete secondary	1	1	1	1	1	Urban	Urban	Urban	Urban
811	-22.53998319	17.05267383	60401017	Khomasdal North	2	Male	40 - 44	0	0	0	0	0	0	Complete tertiary	1	1	1	1	1	Urban	Urban	Urban	Urban
812	-22.54005888	17.05268465	60401017	Khomasdal North	1	Female	30 - 34	0	0	0	0	0	0	Complete secondary	1	1	1	1	1	Urban	Urban	Urban	Urban
813	-22.54005888	17.05268465	60401017	Khomasdal North	5	Male	40 - 44	0	0	0	0	0	1	Complete primary	1	1	1	1	1	Urban	Urban	Urban	Urban
814	-22.54016702	17.05283604	60401017	Khomasdal North	2	Male	25 - 29	0	0	0	0	0	0	Complete primary	1	1	1	1	1	Urban	Urban	Urban	Urban
815	-22.54023731	17.05286307	60401017	Khomasdal North	7	Female	30 - 34	0	0	0	0	0	1	Complete secondary	1	1	1	1	1	Urban	Urban	Urban	Urban
816	-22.54030219	17.05285767	60401017	Khomasdal North	3	Female	50 - 54	0	0	0	0	0	0	Complete primary	1	1	1	1	1	Urban	Urban	Urban	Urban
817	-22.54036707	17.05286307	60401017	Khomasdal North	2	Female	35 - 39	0	0	0	0	0	0	Complete secondary	1	1	1	1	1	Urban	Urban	Urban	Urban
818	-22.54042654	17.05287929	60401017	Khomasdal North	4	Female	40 - 44	0	1	0	0	0	1	Complete tertiary	1	1	1	1	1	Urban	Urban	Urban	Urban
819	-22.54042654	17.05287929	60401017	Khomasdal North	7	Female	40 - 44	0	0	0	0	0	0	Complete secondary	1	1	1	1	1	Urban	Urban	Urban	Urban
820	-22.54021568	17.05297662	60401017	Khomasdal North	6	Male	40 - 44	0	0	0	0	0	0	Complete secondary	1	1	1	1	1	Urban	Urban	Urban	Urban
821	-22.54028056	17.05300365	60401017	Khomasdal North	1	Male	30 - 34	0	0	1	0	0	0	Complete secondary	1	1	1	1	1	Urban	Urban	Urban	Urban
822	-22.54033463	17.05301446	60401017	Khomasdal North	7	Male	40 - 44	0	0	0	0	1	1	No formal	1	1	1	1	1	Urban	Urban	Urban	Urban
823	-22.5403941	17.05302528	60401017	Khomasdal North	2	Male	40 - 44	0	0	0	0	0	0	Complete tertiary	1	1	1	1	1	Urban	Urban	Urban	Urban
824	-22.5403941	17.05302528	60401017	Khomasdal North	1	Male	30 - 34	0	0	0	0	0	0	Complete tertiary	1	1	1	1	1	Urban	Urban	Urban	Urban
825	-22.54064282	17.05263058	60401017	Khomasdal North	2	Male	20 - 24	0	0	0	0	0	0	Complete secondary	1	1	1	0	0	Urban	Urban	Urban	Urban
826	-22.54069689	17.05266302	60401017	Khomasdal North	1	Male	40 - 44	0	0	0	0	0	0	Complete primary	1	1	1	1	1	Urban	Urban	Urban	Urban
827	-22.54061038	17.05275494	60401017	Khomasdal North	2	Male	40 - 44	0	0	1	0	0	0	Incomplete primary	1	1	1	1	1	Urban	Urban	Urban	Urban
828	-22.54068066	17.05277656	60401017	Khomasdal North	1	Female	20 - 24	0	0	0	0	0	0	Complete primary	1	1	1	1	1	Urban	Urban	Urban	Urban
829	-22.54060497	17.05286848	60401017	Khomasdal North	1	Female	35 - 39	0	0	1	0	0	0	Complete primary	1	1	1	1	1	Urban	Urban	Urban	Urban
830	-22.54068066	17.05289011	60401017	Khomasdal North	4	Female	35 - 39	0	0	1	0	0	0	Complete tertiary	1	1	1	1	1	Urban	Urban	Urban	Urban
831	-22.54057253	17.05302528	60401017	Khomasdal North	4	Female	40 - 44	0	0	0	0	1	0	Complete secondary	1	1	1	1	0	Urban	Urban	Urban	Urban
832	-22.54067526	17.0530469	60401017	Khomasdal North	1	Male	25 - 29	0	0	1	0	0	0	Complete tertiary	1	1	1	1	1	Urban	Urban	Urban	Urban
833	-22.54047521	17.05260895	60401017	Khomasdal North	4	Male	60 - 64	0	0	1	0	0	0	Complete primary	1	1	1	1	1	Urban	Urban	Urban	Urban
834	-22.54047521	17.05269006	60401017	Khomasdal North	7	Male	20 - 24	0	0	0	0	0	0	Complete primary	1	1	1	1	1	Urban	Urban	Urban	Urban
835	-22.54038329	17.05259814	60401017	Khomasdal North	3	Male	30 - 34	0	0	1	0	0	0	Complete secondary	1	1	1	1	1	Urban	Urban	Urban	Urban
836	-22.54038329	17.05267924	60401017	Khomasdal North	1	Male	25 - 29	0	0	0	0	0	0	Complete tertiary	1	1	1	1	1	Urban	Urban	Urban	Urban
837	-22.54029678	17.05256029	60401017	Khomasdal North	8	Male	65 - 74	0	0	0	0	0	0	Incomplete primary	1	1	1	1	1	Urban	Urban	Urban	Urban
838	-22.54028597	17.0526468	60401017	Khomasdal North	4	Male	45 - 49	0	0	0	0	1	0	Incomplete primary	1	1	1	1	1	Urban	Urban	Urban	Urban
839	-22.54116187	17.052809	60401017	Khomasdal North	5	Female	45 - 49	0	0	0	0	0	1	Complete primary	1	1	1	1	1	Urban	Urban	Urban	Urban
840	-22.54132408	17.05281441	60401017	Khomasdal North	4	Male	45 - 49	0	1	0	0	0	0	Complete tertiary	1	1	1	1	1	Urban	Urban	Urban	Urban
841	-22.5415025	17.0528036	60401017	Khomasdal North	7	Female	25 - 29	0	0	0	0	1	0	Complete primary	1	1	1	1	1	Urban	Urban	Urban	Urban
842	-22.54156738	17.05283063	60401017	Khomasdal North	3	Male	50 - 54	0	0	0	0	0	0	Complete primary	1	1	1	1	1	Urban	Urban	Urban	Urban
843	-22.54172959	17.0528847	60401017	Khomasdal North	5	Female	30 - 34	0	0	0	0	0	1	Complete primary	1	1	1	1	0	Urban	Urban	Urban	Urban
844	-22.54122135	17.0530415	60401017	Khomasdal North	6	Male	35 - 39	0	0	0	0	0	1	Complete primary	1	1	1	1	1	Urban	Urban	Urban	Urban
845	-22.54135111	17.05308475	60401017	Khomasdal North	2	Male	30 - 34	0	0	0	0	0	0	Complete secondary	1	1	1	1	1	Urban	Urban	Urban	Urban
846	-22.54156738	17.05308475	60401017	Khomasdal North	2	Female	50 - 54	0	0	0	0	0	0	Complete primary	1	1	1	1	1	Urban	Urban	Urban	Urban
847	-22.54170796	17.05312801	60401017	Khomasdal North	2	Female	20 - 24	0	0	0	0	0	0	Complete primary	1	1	1	1	1	Urban	Urban	Urban	Urban
848	-22.5415782	17.05317667	60401017	Khomasdal North	4	Male	25 - 29	0	0	0	0	0	0	Complete tertiary	1	1	1	1	1	Urban	Urban	Urban	Urban
849	-22.54168633	17.05322533	60401017	Khomasdal North	6	Female	30 - 34	0	0	0	0	0	1	Complete tertiary	1	1	1	1	1	Urban	Urban	Urban	Urban
850	-22.53751227	17.05212234	60401017	Khomasdal North	6	Male	35 - 39	0	0	1	0	0	0	Complete tertiary	1	1	1	1	1	Urban	Urban	Urban	Urban
851	-22.53770151	17.05218181	60401017	Khomasdal North	8	Male	40 - 44	0	0	0	0	0	1	Complete primary	1	1	1	1	1	Urban	Urban	Urban	Urban
852	-22.53781505	17.05222507	60401017	Khomasdal North	2	Female	30 - 34	0	0	0	0	0	1	Complete tertiary	1	1	1	1	1	Urban	Urban	Urban	Urban
853	-22.53798807	17.05222507	60401017	Khomasdal North	1	Female	25 - 29	0	0	1	0	0	0	Complete secondary	1	1	1	0	0	Urban	Urban	Urban	Urban
854	-22.53811243	17.0522521	60401017	Khomasdal North	2	Female	45 - 49	0	0	1	0	0	0	No formal	1	1	1	1	1	Urban	Urban	Urban	Urban
855	-22.53827463	17.0522521	60401017	Khomasdal North	1	Male	35 - 39	0	0	1	0	0	0	Complete primary	1	1	1	1	1	Urban	Urban	Urban	Urban
856	-22.53635522	17.04693721	60401018	Khomasdal North	9	Female	35 - 39	0	0	0	0	1	1	Complete secondary	1	1	1	1	1	Urban	Urban	Urban	Urban
857	-22.53648498	17.0469318	60401018	Khomasdal North	3	Female	30 - 34	0	0	0	0	0	0	Complete secondary	1	1	1	1	1	Urban	Urban	Urban	Urban
858	-22.5365823	17.04689936	60401018	Khomasdal North	7	Male	45 - 49	0	0	0	0	0	1	Complete primary	1	1	1	1	1	Urban	Urban	Urban	Urban
859	-22.53668503	17.04688314	60401018	Khomasdal North	3	Male	35 - 39	0	0	0	0	0	0	Complete tertiary	1	1	1	1	1	Urban	Urban	Urban	Urban
860	-22.53695537	17.0468507	60401018	Khomasdal North	6	Male	40 - 44	0	0	0	0	0	0	Complete primary	1	1	1	1	1	Urban	Urban	Urban	Urban
861	-22.53708513	17.04684529	60401018	Khomasdal North	5	Female	40 - 44	0	0	0	0	0	1	Complete primary	1	1	1	1	0	Urban	Urban	Urban	Urban
862	-22.53723653	17.04682366	60401018	Khomasdal North	2	Female	25 - 29	0	0	1	0	0	0	Complete secondary	1	1	1	1	1	Urban	Urban	Urban	Urban
863	-22.53735548	17.04680744	60401018	Khomasdal North	7	Male	45 - 49	0	0	0	0	0	1	Complete secondary	1	1	1	1	1	Urban	Urban	Urban	Urban
864	-22.53748524	17.04679663	60401018	Khomasdal North	1	Female	25 - 29	0	0	0	0	0	0	Complete secondary	1	1	1	1	1	Urban	Urban	Urban	Urban
865	-22.53763122	17.04676419	60401018	Khomasdal North	1	Female	40 - 44	0	0	0	0	0	0	Complete tertiary	1	1	1	1	1	Urban	Urban	Urban	Urban
866	-22.53776639	17.04674797	60401018	Khomasdal North	5	Female	40 - 44	0	0	0	0	0	1	Complete primary	1	1	1	1	1	Urban	Urban	Urban	Urban
867	-22.53790697	17.04681826	60401018	Khomasdal North	1	Male	30 - 34	0	0	0	0	0	0	Incomplete primary	1	1	1	1	1	Urban	Urban	Urban	Urban
868	-22.53807458	17.04665605	60401018	Khomasdal North	4	Female	35 - 39	0	0	1	0	1	0	Complete tertiary	1	1	1	1	1	Urban	Urban	Urban	Urban
869	-22.53822597	17.04654792	60401018	Khomasdal North	2	Male	30 - 34	0	0	0	0	0	0	Complete secondary	1	1	1	1	1	Urban	Urban	Urban	Urban
870	-22.53830167	17.04647222	60401018	Khomasdal North	5	Male	50 - 54	0	0	0	0	0	0	No formal	1	1	1	1	1	Urban	Urban	Urban	Urban
871	-22.5384855	17.04639112	60401018	Khomasdal North	4	Male	45 - 49	0	0	0	0	0	0	Incomplete primary	1	1	1	1	1	Urban	Urban	Urban	Urban
872	-22.5385666	17.0463749	60401018	Khomasdal North	5	Male	35 - 39	0	0	0	0	0	1	Complete tertiary	1	1	1	1	1	Urban	Urban	Urban	Urban
873	-22.53869636	17.04630461	60401018	Khomasdal North	3	Female	35 - 39	0	0	0	0	0	1	Complete primary	1	1	1	1	1	Urban	Urban	Urban	Urban
874	-22.53884235	17.04621269	60401018	Khomasdal North	2	Male	25 - 29	0	0	0	0	0	0	Complete secondary	1	1	1	1	1	Urban	Urban	Urban	Urban
875	-22.53899915	17.04614241	60401018	Khomasdal North	1	Male	20 - 24	0	0	0	0	0	0	Complete primary	1	1	1	1	0	Urban	Urban	Urban	Urban
876	-22.53911269	17.0460559	60401018	Khomasdal North	7	Male	40 - 44	0	0	1	0	1	1	Complete secondary	1	1	1	1	1	Urban	Urban	Urban	Urban
877	-22.53926408	17.04594776	60401018	Khomasdal North	2	Female	45 - 49	0	0	0	0	0	0	Complete primary	1	1	1	1	1	Urban	Urban	Urban	Urban
878	-22.53752849	17.04759684	60401018	Khomasdal North	5	Male	40 - 44	0	0	0	0	0	0	Complete primary	1	1	1	1	1	Urban	Urban	Urban	Urban
879	-22.53763663	17.04761847	60401018	Khomasdal North	8	Male	55 - 59	0	0	0	0	0	0	Incomplete primary	1	1	1	0	0	Urban	Urban	Urban	Urban
880	-22.5377718	17.04761847	60401018	Khomasdal North	5	Male	65 - 74	0	0	0	0	0	0	Complete primary	1	1	1	1	1	Urban	Urban	Urban	Urban
881	-22.53794482	17.04765631	60401018	Khomasdal North	1	Male	25 - 29	0	0	0	0	0	0	Complete primary	1	1	1	1	1	Urban	Urban	Urban	Urban
882	-22.53806917	17.04764009	60401018	Khomasdal North	4	Male	40 - 44	0	0	1	0	0	0	Complete secondary	1	1	1	1	1	Urban	Urban	Urban	Urban
883	-22.53810162	17.04769416	60401018	Khomasdal North	1	Female	40 - 44	0	0	0	0	0	0	Complete primary	1	1	1	1	1	Urban	Urban	Urban	Urban
884	-22.53818272	17.04769957	60401018	Khomasdal North	4	Male	50 - 54	0	0	0	0	0	0	No formal	1	1	1	1	1	Urban	Urban	Urban	Urban
885	-22.53833411	17.04769957	60401018	Khomasdal North	3	Male	20 - 24	0	0	0	0	0	0	Complete secondary	1	1	1	1	1	Urban	Urban	Urban	Urban
886	-22.53716083	17.04798072	60401018	Khomasdal North	3	Male	45 - 49	0	0	0	0	0	0	Complete primary	1	1	1	1	1	Urban	Urban	Urban	Urban
887	-22.53716083	17.04815374	60401018	Khomasdal North	6	Female	55 - 59	0	0	1	0	1	1	Complete primary	1	1	1	1	1	Urban	Urban	Urban	Urban
888	-22.53714461	17.04833757	60401018	Khomasdal North	4	Male	40 - 44	0	0	0	0	0	0	Complete secondary	1	1	1	1	1	Urban	Urban	Urban	Urban
889	-22.53719327	17.04846734	60401018	Khomasdal North	4	Female	45 - 49	0	0	0	0	1	1	Complete primary	1	1	1	1	1	Urban	Urban	Urban	Urban
890	-22.53720408	17.0485971	60401018	Khomasdal North	3	Male	75+	0	0	0	0	0	0	No formal	1	1	1	1	1	Urban	Urban	Urban	Urban
891	-22.5372149	17.04876471	60401018	Khomasdal North	6	Male	40 - 44	0	0	0	0	0	1	Complete primary	1	1	1	1	1	Urban	Urban	Urban	Urban
892	-22.53725815	17.04892151	60401018	Khomasdal North	2	Female	20 - 24	0	0	1	0	0	0	Complete secondary	1	1	1	1	1	Urban	Urban	Urban	Urban
893	-22.53726356	17.04902424	60401018	Khomasdal North	6	Female	25 - 29	0	0	0	0	0	1	Complete primary	1	1	1	1	1	Urban	Urban	Urban	Urban
894	-22.53727437	17.04922429	60401018	Khomasdal North	2	Male	50 - 54	0	0	0	0	0	0	Complete tertiary	1	1	1	1	0	Urban	Urban	Urban	Urban
895	-22.53727437	17.04932702	60401018	Khomasdal North	2	Female	30 - 34	0	0	1	0	0	0	Complete primary	1	1	1	1	1	Urban	Urban	Urban	Urban
896	-22.53727437	17.04950544	60401018	Khomasdal North	4	Female	25 - 29	0	0	0	0	0	1	Complete secondary	1	1	1	1	1	Urban	Urban	Urban	Urban
897	-22.537296	17.04963521	60401018	Khomasdal North	4	Male	25 - 29	0	0	0	0	0	0	Complete tertiary	1	1	1	1	0	Urban	Urban	Urban	Urban
898	-22.53730681	17.04975956	60401018	Khomasdal North	2	Female	50 - 54	0	0	0	0	0	0	Complete primary	1	1	1	1	1	Urban	Urban	Urban	Urban
899	-22.53732844	17.04991636	60401018	Khomasdal North	4	Male	Oct-14	0	0	0	0	0	0	No formal	1	1	1	1	1	Urban	Urban	Urban	Urban
900	-22.53733926	17.05004612	60401018	Khomasdal North	3	Female	35 - 39	0	1	0	0	0	1	Complete tertiary	1	1	1	1	1	Urban	Urban	Urban	Urban
901	-22.53735548	17.05024618	60401018	Khomasdal North	2	Male	65 - 74	0	0	0	0	0	0	Complete primary	1	1	1	1	1	Urban	Urban	Urban	Urban
902	-22.53736088	17.05037053	60401018	Khomasdal North	6	Male	25 - 29	0	0	1	0	0	1	Complete primary	1	1	1	1	1	Urban	Urban	Urban	Urban
903	-22.5374528	17.05040297	60401018	Khomasdal North	5	Female	40 - 44	0	0	0	0	1	1	Complete tertiary	1	1	1	1	1	Urban	Urban	Urban	Urban
904	-22.53758256	17.05039757	60401018	Khomasdal North	3	Female	45 - 49	0	0	0	0	0	0	Complete tertiary	1	1	1	1	1	Urban	Urban	Urban	Urban
905	-22.53770692	17.05020833	60401018	Khomasdal North	6	Male	45 - 49	0	1	0	0	0	0	Complete primary	1	1	1	1	1	Urban	Urban	Urban	Urban
906	-22.53767448	17.05004612	60401018	Khomasdal North	3	Female	35 - 39	0	0	0	0	0	0	Complete primary	1	1	1	1	1	Urban	Urban	Urban	Urban
907	-22.5376961	17.0498677	60401018	Khomasdal North	6	Male	40 - 44	0	0	1	0	0	1	Complete secondary	1	1	1	1	1	Urban	Urban	Urban	Urban
908	-22.53768529	17.04973794	60401018	Khomasdal North	3	Female	20 - 24	0	0	1	0	0	0	Complete primary	1	1	1	1	1	Urban	Urban	Urban	Urban
909	-22.53767448	17.0496298	60401018	Khomasdal North	4	Male	60 - 64	0	0	0	0	0	0	Complete primary	1	1	1	1	1	Urban	Urban	Urban	Urban
910	-22.53764744	17.0494676	60401018	Khomasdal North	2	Male	35 - 39	0	0	0	0	0	0	Complete primary	1	1	1	1	1	Urban	Urban	Urban	Urban
911	-22.53762582	17.04929998	60401018	Khomasdal North	3	Male	25 - 29	0	0	0	0	0	0	Complete primary	1	1	1	1	1	Urban	Urban	Urban	Urban
912	-22.53762582	17.04920266	60401018	Khomasdal North	9	Male	35 - 39	1	0	0	0	0	0	Complete secondary	1	1	1	1	1	Urban	Urban	Urban	Urban
913	-22.53758797	17.04906749	60401018	Khomasdal North	2	Male	55 - 59	0	0	0	0	0	1	Incomplete primary	1	1	1	1	1	Urban	Urban	Urban	Urban
914	-22.53758797	17.04889988	60401018	Khomasdal North	4	Male	55 - 59	0	0	0	0	0	1	Complete primary	1	1	1	1	1	Urban	Urban	Urban	Urban
915	-22.53757715	17.04877552	60401018	Khomasdal North	4	Male	35 - 39	0	0	0	0	0	1	Complete tertiary	1	1	1	1	0	Urban	Urban	Urban	Urban
916	-22.53756634	17.04862954	60401018	Khomasdal North	4	Female	30 - 34	0	0	0	0	1	1	Complete tertiary	1	1	1	1	1	Urban	Urban	Urban	Urban
917	-22.53756634	17.04840786	60401018	Khomasdal North	5	Female	45 - 49	0	0	0	0	1	1	Complete primary	1	1	1	1	0	Urban	Urban	Urban	Urban
918	-22.53753931	17.04831594	60401018	Khomasdal North	5	Male	45 - 49	0	0	0	0	0	1	Complete secondary	1	1	1	1	1	Urban	Urban	Urban	Urban
919	-22.53751768	17.04812671	60401018	Khomasdal North	3	Male	60 - 64	0	0	0	0	0	0	Incomplete primary	1	1	1	1	1	Urban	Urban	Urban	Urban
920	-22.53746902	17.04797532	60401018	Khomasdal North	5	Male	50 - 54	0	0	1	0	0	0	Incomplete primary	1	1	1	1	1	Urban	Urban	Urban	Urban
921	-22.53791238	17.04806723	60401018	Khomasdal North	2	Male	35 - 39	0	0	0	0	0	0	Complete tertiary	1	1	1	1	1	Urban	Urban	Urban	Urban
922	-22.53786372	17.0482024	60401018	Khomasdal North	1	Male	25 - 29	0	0	1	0	0	0	Complete primary	1	1	1	1	1	Urban	Urban	Urban	Urban
923	-22.53785831	17.04834839	60401018	Khomasdal North	5	Male	40 - 44	0	0	0	0	0	1	Complete tertiary	1	1	1	1	1	Urban	Urban	Urban	Urban
924	-22.53786372	17.0485214	60401018	Khomasdal North	9	Male	60 - 64	0	0	0	0	1	0	Complete secondary	1	1	1	1	1	Urban	Urban	Urban	Urban
925	-22.53788534	17.0486782	60401018	Khomasdal North	7	Male	50 - 54	0	1	0	0	0	0	Complete tertiary	1	1	1	1	1	Urban	Urban	Urban	Urban
926	-22.5379286	17.04887285	60401018	Khomasdal North	1	Male	20 - 24	0	0	0	0	0	0	Complete primary	1	1	1	1	1	Urban	Urban	Urban	Urban
927	-22.537934	17.04893773	60401018	Khomasdal North	7	Male	55 - 59	0	0	0	0	0	0	Complete primary	1	1	1	1	1	Urban	Urban	Urban	Urban
928	-22.53794482	17.04905668	60401018	Khomasdal North	16	Female	65 - 74	0	1	0	0	1	1	Incomplete primary	1	1	1	1	1	Urban	Urban	Urban	Urban
929	-22.53796104	17.04919185	60401018	Khomasdal North	3	Female	45 - 49	0	0	0	0	0	0	Complete primary	1	1	1	1	1	Urban	Urban	Urban	Urban
930	-22.53796104	17.04942434	60401018	Khomasdal North	1	Male	30 - 34	0	0	0	0	0	0	Complete tertiary	1	1	1	1	1	Urban	Urban	Urban	Urban
931	-22.53799348	17.04952707	60401018	Khomasdal North	1	Male	25 - 29	0	0	1	0	0	0	Complete tertiary	1	1	1	1	1	Urban	Urban	Urban	Urban
932	-22.53799348	17.04968927	60401018	Khomasdal North	4	Male	45 - 49	0	0	0	0	0	0	Complete primary	1	1	1	1	1	Urban	Urban	Urban	Urban
933	-22.53801511	17.04982444	60401018	Khomasdal North	3	Female	40 - 44	0	0	0	0	0	1	Complete primary	1	1	1	1	0	Urban	Urban	Urban	Urban
934	-22.53801511	17.04993258	60401018	Khomasdal North	1	Male	15 - 19	0	0	1	0	0	0	No formal	1	1	1	1	1	Urban	Urban	Urban	Urban
935	-22.5380097	17.05011101	60401018	Khomasdal North	4	Female	35 - 39	0	0	0	0	0	1	No formal	1	1	1	1	1	Urban	Urban	Urban	Urban
936	-22.53824219	17.05014885	60401018	Khomasdal North	2	Male	45 - 49	0	0	0	0	0	0	Complete secondary	1	1	1	1	0	Urban	Urban	Urban	Urban
937	-22.53827463	17.05033809	60401018	Khomasdal North	5	Female	30 - 34	0	0	0	0	0	1	Incomplete primary	1	1	1	1	1	Urban	Urban	Urban	Urban
938	-22.53803673	17.05024077	60401018	Khomasdal North	10	Male	45 - 49	0	0	0	0	1	1	Complete tertiary	1	1	1	1	1	Urban	Urban	Urban	Urban
939	-22.53838818	17.04993799	60401018	Khomasdal North	8	Male	45 - 49	0	0	0	0	0	0	No formal	1	1	1	1	1	Urban	Urban	Urban	Urban
940	-22.53836655	17.04982444	60401018	Khomasdal North	5	Male	40 - 44	0	0	0	0	0	0	Complete primary	1	1	1	1	1	Urban	Urban	Urban	Urban
941	-22.53836114	17.04965143	60401018	Khomasdal North	5	Male	50 - 54	0	0	0	0	0	0	Incomplete primary	1	1	1	1	1	Urban	Urban	Urban	Urban
942	-22.53836114	17.04952166	60401018	Khomasdal North	4	Female	15 - 19	0	0	0	0	0	0	Complete secondary	1	1	1	1	1	Urban	Urban	Urban	Urban
943	-22.53834492	17.04935946	60401018	Khomasdal North	5	Male	60 - 64	0	0	0	0	0	0	Complete primary	1	1	1	1	1	Urban	Urban	Urban	Urban
944	-22.53833952	17.04922429	60401018	Khomasdal North	1	Male	30 - 34	0	0	0	0	0	0	Complete secondary	1	1	1	1	1	Urban	Urban	Urban	Urban
945	-22.5383287	17.04906749	60401018	Khomasdal North	4	Female	50 - 54	0	0	0	0	0	0	Complete primary	1	1	1	1	1	Urban	Urban	Urban	Urban
946	-22.53831248	17.04895935	60401018	Khomasdal North	5	Male	45 - 49	0	0	1	0	0	0	Complete primary	1	1	1	1	1	Urban	Urban	Urban	Urban
947	-22.53831789	17.0487539	60401018	Khomasdal North	2	Male	35 - 39	0	0	0	0	0	0	Complete primary	1	1	1	1	1	Urban	Urban	Urban	Urban
948	-22.53829085	17.04863495	60401018	Khomasdal North	4	Female	35 - 39	0	0	0	0	0	1	Complete primary	1	1	1	1	0	Urban	Urban	Urban	Urban
949	-22.53825841	17.04846193	60401018	Khomasdal North	2	Male	35 - 39	0	0	0	0	0	0	Complete secondary	1	1	1	1	1	Urban	Urban	Urban	Urban
950	-22.53825301	17.04832676	60401018	Khomasdal North	1	Female	40 - 44	0	0	1	0	0	0	Complete primary	1	1	1	1	1	Urban	Urban	Urban	Urban
951	-22.53824219	17.04824025	60401018	Khomasdal North	3	Male	65 - 74	0	0	0	0	0	0	Complete tertiary	1	1	1	1	1	Urban	Urban	Urban	Urban
952	-22.53822057	17.04808345	60401018	Khomasdal North	7	Male	55 - 59	0	0	0	0	0	1	Complete primary	1	1	1	1	1	Urban	Urban	Urban	Urban
953	-22.53804214	17.0480402	60401018	Khomasdal North	5	Male	45 - 49	0	0	1	0	1	0	Incomplete primary	1	1	1	1	1	Urban	Urban	Urban	Urban
954	-22.5356253	17.04111948	60401019	Khomasdal North	4	Male	35 - 39	0	0	0	0	1	1	Complete tertiary	1	1	1	1	1	Urban	Urban	Urban	Urban
955	-22.53580913	17.04126006	60401019	Khomasdal North	1	Male	50 - 54	0	0	1	0	0	0	Complete primary	1	1	1	1	1	Urban	Urban	Urban	Urban
956	-22.53561448	17.0412979	60401019	Khomasdal North	5	Male	35 - 39	0	0	1	0	0	0	Complete secondary	1	1	1	1	1	Urban	Urban	Urban	Urban
957	-22.53561989	17.04148714	60401019	Khomasdal North	3	Male	45 - 49	0	0	0	0	0	1	Complete primary	1	1	1	1	1	Urban	Urban	Urban	Urban
958	-22.53564692	17.04168179	60401019	Khomasdal North	3	Male	45 - 49	0	0	0	0	0	1	Complete primary	1	1	1	1	0	Urban	Urban	Urban	Urban
959	-22.53567396	17.04181155	60401019	Khomasdal North	5	Male	35 - 39	0	0	0	0	0	0	Complete primary	1	1	1	1	1	Urban	Urban	Urban	Urban
960	-22.53569018	17.04201701	60401019	Khomasdal North	4	Female	40 - 44	0	0	0	0	1	1	Complete primary	1	1	1	1	1	Urban	Urban	Urban	Urban
961	-22.53572262	17.04213596	60401019	Khomasdal North	4	Female	50 - 54	0	0	0	0	0	0	Complete primary	1	1	1	1	1	Urban	Urban	Urban	Urban
962	-22.53577128	17.04240089	60401019	Khomasdal North	1	Female	20 - 24	0	0	0	0	0	0	Complete primary	1	1	1	1	1	Urban	Urban	Urban	Urban
963	-22.5358686	17.04144389	60401019	Khomasdal North	7	Female	35 - 39	0	0	0	0	0	1	Complete primary	1	1	1	1	1	Urban	Urban	Urban	Urban
964	-22.53589023	17.04164394	60401019	Khomasdal North	7	Female	45 - 49	0	1	0	0	0	1	Complete primary	1	1	1	1	1	Urban	Urban	Urban	Urban
965	-22.53590104	17.04180614	60401019	Khomasdal North	2	Male	45 - 49	0	0	0	0	0	0	Complete primary	1	1	1	1	1	Urban	Urban	Urban	Urban
966	-22.53591726	17.04200079	60401019	Khomasdal North	8	Male	40 - 44	0	0	0	0	0	0	Complete tertiary	1	1	1	1	0	Urban	Urban	Urban	Urban
967	-22.5359497	17.04216299	60401019	Khomasdal North	5	Male	40 - 44	0	0	1	0	0	1	Complete primary	1	1	1	1	1	Urban	Urban	Urban	Urban
968	-22.53604162	17.04236845	60401019	Khomasdal North	4	Male	30 - 34	0	0	0	0	1	0	Complete tertiary	1	1	1	1	1	Urban	Urban	Urban	Urban
969	-22.53619842	17.04242793	60401019	Khomasdal North	5	Female	50 - 54	0	0	0	0	0	0	Complete primary	1	1	1	1	1	Urban	Urban	Urban	Urban
970	-22.53632818	17.04251444	60401019	Khomasdal North	4	Male	45 - 49	0	0	0	0	1	0	Complete primary	1	1	1	1	1	Urban	Urban	Urban	Urban
971	-22.53647957	17.04257932	60401019	Khomasdal North	6	Male	45 - 49	1	0	0	0	0	0	Complete secondary	1	1	1	1	1	Urban	Urban	Urban	Urban
972	-22.53660393	17.04264961	60401019	Khomasdal North	5	Male	65 - 74	0	0	0	0	0	1	No formal	1	1	1	1	1	Urban	Urban	Urban	Urban
973	-22.53680398	17.04276315	60401019	Khomasdal North	4	Male	55 - 59	0	0	0	0	0	0	Complete secondary	1	1	1	1	1	Urban	Urban	Urban	Urban
974	-22.53691212	17.04283884	60401019	Khomasdal North	5	Male	55 - 59	0	1	0	0	0	0	Complete primary	1	1	1	1	1	Urban	Urban	Urban	Urban
975	-22.53703647	17.04295239	60401019	Khomasdal North	13	Male	45 - 49	0	0	0	0	1	0	Complete secondary	1	1	1	1	1	Urban	Urban	Urban	Urban
976	-22.53711758	17.0430443	60401019	Khomasdal North	2	Female	35 - 39	0	0	0	0	0	0	Complete tertiary	1	1	1	1	1	Urban	Urban	Urban	Urban
977	-22.53728519	17.04316866	60401019	Khomasdal North	1	Male	25 - 29	0	0	1	0	0	0	Complete primary	1	1	1	1	1	Urban	Urban	Urban	Urban
978	-22.53742576	17.04321191	60401019	Khomasdal North	2	Male	20 - 24	0	0	0	0	0	0	Complete tertiary	1	1	1	1	1	Urban	Urban	Urban	Urban
979	-22.53593348	17.04257932	60401019	Khomasdal North	2	Male	25 - 29	0	0	1	0	0	0	Complete secondary	1	1	1	1	1	Urban	Urban	Urban	Urban
980	-22.53609028	17.04266583	60401019	Khomasdal North	6	Male	60 - 64	0	0	0	0	0	1	Complete primary	1	1	1	1	0	Urban	Urban	Urban	Urban
981	-22.53623086	17.04273611	60401019	Khomasdal North	2	Male	30 - 34	0	0	0	0	0	0	Complete tertiary	1	1	1	1	1	Urban	Urban	Urban	Urban
982	-22.53636603	17.04282803	60401019	Khomasdal North	8	Female	30 - 34	0	1	1	0	1	1	Complete secondary	1	1	1	1	1	Urban	Urban	Urban	Urban
983	-22.53648498	17.04289832	60401019	Khomasdal North	1	Male	45 - 49	0	0	0	0	0	0	Complete primary	1	1	1	1	1	Urban	Urban	Urban	Urban
984	-22.536658	17.04299023	60401019	Khomasdal North	3	Male	25 - 29	0	0	1	0	0	0	Complete tertiary	1	1	1	1	0	Urban	Urban	Urban	Urban
985	-22.53678776	17.04306052	60401019	Khomasdal North	5	Male	25 - 29	0	0	0	0	0	1	Complete secondary	1	1	1	1	1	Urban	Urban	Urban	Urban
986	-22.53690671	17.04315785	60401019	Khomasdal North	8	Male	55 - 59	0	0	0	0	0	0	Complete primary	1	1	1	1	1	Urban	Urban	Urban	Urban
987	-22.53703647	17.04322813	60401019	Khomasdal North	6	Female	20 - 24	0	0	0	0	0	1	Complete secondary	1	1	1	1	1	Urban	Urban	Urban	Urban
988	-22.53718786	17.0433579	60401019	Khomasdal North	2	Female	20 - 24	0	0	0	0	0	0	Complete secondary	1	1	1	1	1	Urban	Urban	Urban	Urban
989	-22.53734466	17.04345522	60401019	Khomasdal North	6	Male	35 - 39	0	0	0	0	0	1	Complete primary	1	1	1	1	1	Urban	Urban	Urban	Urban
990	-22.53621464	17.04131412	60401019	Khomasdal North	5	Female	40 - 44	0	0	0	0	1	0	Complete primary	1	1	1	1	1	Urban	Urban	Urban	Urban
991	-22.53622005	17.04147092	60401019	Khomasdal North	1	Male	30 - 34	0	0	0	0	0	0	Complete tertiary	1	1	1	1	1	Urban	Urban	Urban	Urban
992	-22.53623086	17.04160609	60401019	Khomasdal North	4	Female	40 - 44	0	0	0	0	1	0	Complete primary	1	1	1	1	1	Urban	Urban	Urban	Urban
993	-22.53625789	17.04174126	60401019	Khomasdal North	3	Male	50 - 54	0	0	0	0	0	0	Incomplete primary	1	1	1	1	1	Urban	Urban	Urban	Urban
994	-22.53625789	17.04188725	60401019	Khomasdal North	1	Female	35 - 39	0	0	0	0	0	0	Complete tertiary	1	1	1	1	1	Urban	Urban	Urban	Urban
995	-22.53629033	17.04206026	60401019	Khomasdal North	3	Male	40 - 44	0	0	1	0	0	1	Complete secondary	1	1	1	1	1	Urban	Urban	Urban	Urban
996	-22.53644713	17.04215218	60401019	Khomasdal North	7	Male	55 - 59	0	0	0	0	1	0	Incomplete primary	1	1	1	1	1	Urban	Urban	Urban	Urban
997	-22.53655527	17.04220625	60401019	Khomasdal North	2	Male	20 - 24	0	0	0	0	0	0	Complete secondary	1	1	1	1	1	Urban	Urban	Urban	Urban
998	-22.53669044	17.04228194	60401019	Khomasdal North	2	Male	40 - 44	0	1	0	0	0	0	No formal	1	1	1	1	1	Urban	Urban	Urban	Urban
999	-22.53678776	17.04236304	60401019	Khomasdal North	6	Female	50 - 54	0	0	0	0	0	1	No formal	1	1	1	1	1	Urban	Urban	Urban	Urban
1000	-22.53691212	17.04242252	60401019	Khomasdal North	3	Male	35 - 39	0	0	1	0	0	0	Complete primary	1	1	1	1	1	Urban	Urban	Urban	Urban
1001	-22.53703107	17.04250362	60401019	Khomasdal North	1	Male	25 - 29	0	0	1	0	0	0	Incomplete primary	1	1	1	1	1	Urban	Urban	Urban	Urban
1002	-22.53717705	17.04255769	60401019	Khomasdal North	6	Male	35 - 39	0	0	0	0	0	1	Complete primary	1	1	1	0	0	Urban	Urban	Urban	Urban
1003	-22.53730681	17.04269286	60401019	Khomasdal North	11	Female	20 - 24	0	0	0	0	1	1	Complete primary	1	1	1	1	0	Urban	Urban	Urban	Urban
1004	-22.53740414	17.04274152	60401019	Khomasdal North	4	Male	45 - 49	0	0	0	0	0	0	Complete primary	1	1	1	1	1	Urban	Urban	Urban	Urban
1005	-22.53750687	17.04283884	60401019	Khomasdal North	2	Female	50 - 54	0	0	0	0	0	0	Complete primary	1	1	1	1	1	Urban	Urban	Urban	Urban
1006	-22.537615	17.04294698	60401019	Khomasdal North	4	Male	60 - 64	0	0	0	0	0	0	Complete primary	1	1	1	1	1	Urban	Urban	Urban	Urban
1007	-22.53773395	17.04297401	60401019	Khomasdal North	8	Male	30 - 34	0	0	0	0	1	1	Complete tertiary	1	1	1	1	1	Urban	Urban	Urban	Urban
1008	-22.5379286	17.04294698	60401019	Khomasdal North	4	Female	40 - 44	0	0	0	0	1	1	Complete tertiary	1	1	1	1	1	Urban	Urban	Urban	Urban
1009	-22.53805836	17.04293617	60401019	Khomasdal North	6	Male	40 - 44	0	0	0	0	1	0	Complete secondary	1	1	1	1	1	Urban	Urban	Urban	Urban
1010	-22.53822597	17.04294157	60401019	Khomasdal North	1	Male	20 - 24	0	0	0	0	0	0	Complete secondary	1	1	1	1	1	Urban	Urban	Urban	Urban
1011	-22.53613354	17.04436897	60401019	Khomasdal North	2	Female	50 - 54	0	0	0	0	0	0	Complete primary	1	1	1	1	1	Urban	Urban	Urban	Urban
1012	-22.5361822	17.04450414	60401019	Khomasdal North	1	Female	40 - 44	0	0	0	0	0	0	Complete tertiary	1	1	1	1	1	Urban	Urban	Urban	Urban
1013	-22.53619301	17.04466094	60401019	Khomasdal North	5	Male	35 - 39	0	0	0	0	0	0	Complete tertiary	1	1	1	1	1	Urban	Urban	Urban	Urban
1014	-22.5361876	17.04477989	60401019	Khomasdal North	2	Female	30 - 34	0	0	0	0	0	0	Complete tertiary	1	1	1	1	1	Urban	Urban	Urban	Urban
1015	-22.53621464	17.04500157	60401019	Khomasdal North	6	Female	45 - 49	0	0	0	0	0	0	Complete primary	1	1	1	1	1	Urban	Urban	Urban	Urban
1016	-22.53622005	17.04512593	60401019	Khomasdal North	5	Male	55 - 59	0	0	1	0	0	0	Complete primary	1	1	1	1	1	Urban	Urban	Urban	Urban
1017	-22.53623086	17.04530435	60401019	Khomasdal North	2	Male	15 - 19	0	0	0	0	0	0	Complete primary	1	1	1	1	1	Urban	Urban	Urban	Urban
1018	-22.53625249	17.04539627	60401019	Khomasdal North	2	Male	25 - 29	0	0	0	0	0	0	Complete secondary	1	1	1	1	1	Urban	Urban	Urban	Urban
1019	-22.53626871	17.04555847	60401019	Khomasdal North	3	Male	25 - 29	0	0	0	0	0	0	Complete tertiary	1	1	1	1	1	Urban	Urban	Urban	Urban
1020	-22.53630115	17.04581259	60401019	Khomasdal North	2	Female	35 - 39	0	0	0	0	0	0	Complete secondary	1	1	1	1	0	Urban	Urban	Urban	Urban
1021	-22.53627411	17.04599642	60401019	Khomasdal North	1	Male	35 - 39	0	0	0	0	0	0	Complete secondary	1	1	1	1	1	Urban	Urban	Urban	Urban
1022	-22.53627411	17.04609915	60401019	Khomasdal North	4	Female	40 - 44	0	0	0	0	0	0	Complete secondary	1	1	1	1	1	Urban	Urban	Urban	Urban
1023	-22.53629574	17.04624514	60401019	Khomasdal North	4	Male	25 - 29	0	0	0	0	0	0	Complete tertiary	1	1	1	1	1	Urban	Urban	Urban	Urban
1024	-22.53629574	17.0463749	60401019	Khomasdal North	6	Female	35 - 39	0	0	1	0	0	0	Complete secondary	1	1	1	1	1	Urban	Urban	Urban	Urban
1025	-22.53632277	17.04652088	60401019	Khomasdal North	6	Male	30 - 34	0	0	0	0	0	1	Complete primary	1	1	1	1	0	Urban	Urban	Urban	Urban
1026	-22.53643632	17.04412567	60401019	Khomasdal North	1	Male	25 - 29	0	0	1	0	0	0	Complete primary	1	1	1	1	1	Urban	Urban	Urban	Urban
1027	-22.53645254	17.04429868	60401019	Khomasdal North	3	Male	40 - 44	0	0	0	0	0	0	Incomplete primary	1	1	1	1	1	Urban	Urban	Urban	Urban
1028	-22.53648498	17.0444717	60401019	Khomasdal North	6	Male	30 - 34	0	0	0	0	0	1	Incomplete primary	1	1	1	1	1	Urban	Urban	Urban	Urban
1029	-22.53646876	17.04465013	60401019	Khomasdal North	2	Male	20 - 24	0	0	0	0	0	0	Complete secondary	1	1	1	1	1	Urban	Urban	Urban	Urban
1030	-22.53645794	17.04481774	60401019	Khomasdal North	8	Female	50 - 54	0	0	0	0	0	1	No formal	1	1	1	1	1	Urban	Urban	Urban	Urban
1031	-22.53646876	17.04493669	60401019	Khomasdal North	1	Male	30 - 34	0	0	0	0	0	0	Complete secondary	1	1	1	1	1	Urban	Urban	Urban	Urban
1032	-22.53652283	17.04504482	60401019	Khomasdal North	2	Female	60 - 64	0	0	1	0	0	0	Complete tertiary	1	1	1	1	1	Urban	Urban	Urban	Urban
1033	-22.5365012	17.04520162	60401019	Khomasdal North	8	Male	30 - 34	0	0	0	0	0	1	Complete primary	1	1	1	1	1	Urban	Urban	Urban	Urban
1034	-22.53644172	17.04541249	60401019	Khomasdal North	1	Female	40 - 44	0	0	0	0	0	0	Complete primary	1	1	1	1	1	Urban	Urban	Urban	Urban
1035	-22.53645794	17.04554225	60401019	Khomasdal North	8	Male	40 - 44	0	0	0	0	0	0	Complete secondary	1	1	1	1	1	Urban	Urban	Urban	Urban
1036	-22.53657149	17.0458234	60401019	Khomasdal North	6	Male	40 - 44	0	0	0	0	0	1	Complete primary	1	1	1	1	1	Urban	Urban	Urban	Urban
1037	-22.53651201	17.04574771	60401019	Khomasdal North	5	Male	30 - 34	0	0	0	0	0	1	Incomplete primary	1	1	1	1	1	Urban	Urban	Urban	Urban
1038	-22.53653905	17.04593695	60401019	Khomasdal North	3	Female	30 - 34	0	0	0	0	0	0	Complete primary	1	1	1	1	1	Urban	Urban	Urban	Urban
1039	-22.53659312	17.04611537	60401019	Khomasdal North	2	Female	25 - 29	0	0	0	0	0	0	Complete secondary	1	1	1	1	1	Urban	Urban	Urban	Urban
1040	-22.53659852	17.04628298	60401019	Khomasdal North	5	Male	40 - 44	0	0	0	0	0	0	Incomplete primary	1	1	1	1	1	Urban	Urban	Urban	Urban
1041	-22.53663637	17.04636409	60401019	Khomasdal North	4	Female	50 - 54	0	0	0	0	0	0	Complete primary	1	1	1	1	0	Urban	Urban	Urban	Urban
1042	-22.53659312	17.04652629	60401019	Khomasdal North	4	Male	25 - 29	0	0	0	0	1	0	Complete secondary	1	1	1	1	1	Urban	Urban	Urban	Urban
1043	-22.53125659	17.04388236	60401020	Khomasdal North	10	Male	45 - 49	0	0	0	0	1	1	Complete primary	1	1	1	1	1	Urban	Urban	Urban	Urban
1044	-22.5313431	17.04402294	60401020	Khomasdal North	4	Female	25 - 29	0	1	0	0	0	0	Complete secondary	1	1	1	1	1	Urban	Urban	Urban	Urban
1045	-22.53143502	17.04412026	60401020	Khomasdal North	3	Female	25 - 29	0	0	0	0	0	0	Complete primary	1	1	1	1	1	Urban	Urban	Urban	Urban
1046	-22.53151071	17.04420136	60401020	Khomasdal North	1	Male	25 - 29	0	0	1	0	0	0	Complete tertiary	1	1	1	1	1	Urban	Urban	Urban	Urban
1047	-22.53157559	17.04432572	60401020	Khomasdal North	3	Female	40 - 44	0	0	0	0	0	0	Complete primary	1	1	1	0	0	Urban	Urban	Urban	Urban
1048	-22.53165129	17.04438519	60401020	Khomasdal North	11	Female	50 - 54	0	0	0	0	0	1	Complete secondary	1	1	1	1	1	Urban	Urban	Urban	Urban
1049	-22.53172698	17.04443385	60401020	Khomasdal North	5	Female	50 - 54	0	0	1	0	0	0	Complete primary	1	1	1	1	1	Urban	Urban	Urban	Urban
1050	-22.53185134	17.04449333	60401020	Khomasdal North	6	Male	35 - 39	0	0	0	0	0	0	Incomplete primary	1	1	1	1	1	Urban	Urban	Urban	Urban
1051	-22.53193785	17.04462309	60401020	Khomasdal North	2	Male	40 - 44	0	0	0	0	0	0	Complete primary	1	1	1	1	1	Urban	Urban	Urban	Urban
1052	-22.53194866	17.04475286	60401020	Khomasdal North	8	Female	40 - 44	0	0	0	0	0	0	Complete primary	1	1	1	1	1	Urban	Urban	Urban	Urban
1053	-22.53206221	17.04482314	60401020	Khomasdal North	6	Female	30 - 34	0	0	0	0	1	1	Complete secondary	1	1	1	1	1	Urban	Urban	Urban	Urban
1054	-22.53218656	17.04484477	60401020	Khomasdal North	2	Male	30 - 34	0	0	0	0	0	0	Complete secondary	1	1	1	1	1	Urban	Urban	Urban	Urban
1055	-22.53227848	17.04489343	60401020	Khomasdal North	4	Female	30 - 34	0	0	1	0	0	1	Complete secondary	1	1	1	1	1	Urban	Urban	Urban	Urban
1056	-22.53241365	17.04494209	60401020	Khomasdal North	4	Male	40 - 44	0	0	0	0	0	0	Incomplete primary	1	1	1	1	1	Urban	Urban	Urban	Urban
1057	-22.53248935	17.04500698	60401020	Khomasdal North	6	Female	40 - 44	0	0	0	0	0	1	Complete primary	1	1	1	1	1	Urban	Urban	Urban	Urban
1058	-22.53259748	17.04507726	60401020	Khomasdal North	4	Male	25 - 29	0	0	0	0	0	1	No formal	1	1	1	1	1	Urban	Urban	Urban	Urban
1059	-22.53140798	17.04378504	60401020	Khomasdal North	3	Male	25 - 29	0	1	0	0	0	0	Complete tertiary	1	1	1	1	0	Urban	Urban	Urban	Urban
1060	-22.5314999	17.04390939	60401020	Khomasdal North	6	Male	65 - 74	0	0	0	0	0	0	Complete secondary	1	1	1	1	1	Urban	Urban	Urban	Urban
1061	-22.53154856	17.04400672	60401020	Khomasdal North	1	Female	20 - 24	0	0	0	0	0	0	Complete secondary	1	1	1	1	1	Urban	Urban	Urban	Urban
1062	-22.53169454	17.04408782	60401020	Khomasdal North	5	Male	35 - 39	0	0	1	0	0	0	Complete tertiary	1	1	1	1	1	Urban	Urban	Urban	Urban
1063	-22.53172698	17.04414189	60401020	Khomasdal North	11	Female	45 - 49	0	0	0	0	1	1	No formal	1	1	1	1	1	Urban	Urban	Urban	Urban
1064	-22.53183512	17.04420677	60401020	Khomasdal North	6	Male	55 - 59	0	0	1	0	0	1	Incomplete primary	1	1	1	1	1	Urban	Urban	Urban	Urban
1065	-22.53188919	17.0443149	60401020	Khomasdal North	6	Male	35 - 39	0	0	0	0	0	1	Complete primary	1	1	1	1	1	Urban	Urban	Urban	Urban
1066	-22.53196488	17.04439601	60401020	Khomasdal North	7	Female	45 - 49	0	1	0	0	1	0	Complete primary	1	1	1	1	1	Urban	Urban	Urban	Urban
1067	-22.53204599	17.0444717	60401020	Khomasdal North	7	Male	40 - 44	0	0	1	0	0	0	Complete secondary	1	1	1	1	1	Urban	Urban	Urban	Urban
1068	-22.5321379	17.04463931	60401020	Khomasdal North	3	Female	20 - 24	0	0	0	0	0	0	Complete secondary	1	1	1	1	1	Urban	Urban	Urban	Urban
1069	-22.53227848	17.04465553	60401020	Khomasdal North	7	Female	45 - 49	0	0	0	0	1	1	Complete tertiary	1	1	1	1	0	Urban	Urban	Urban	Urban
1070	-22.53234877	17.04476908	60401020	Khomasdal North	5	Male	30 - 34	0	0	0	0	0	1	Complete primary	1	1	1	1	1	Urban	Urban	Urban	Urban
1071	-22.53244609	17.0447853	60401020	Khomasdal North	5	Male	50 - 54	0	0	0	0	0	0	Complete primary	1	1	1	1	1	Urban	Urban	Urban	Urban
1072	-22.5325326	17.04485558	60401020	Khomasdal North	8	Male	60 - 64	0	0	0	0	1	0	Complete primary	1	1	1	1	1	Urban	Urban	Urban	Urban
1073	-22.53263533	17.04490965	60401020	Khomasdal North	3	Female	40 - 44	0	0	0	0	0	0	Complete tertiary	1	1	1	1	1	Urban	Urban	Urban	Urban
1074	-22.53242987	17.04435275	60401020	Khomasdal North	6	Male	55 - 59	0	0	0	0	0	1	Complete primary	1	1	1	1	0	Urban	Urban	Urban	Urban
1075	-22.53255963	17.04442304	60401020	Khomasdal North	4	Female	35 - 39	0	0	1	0	1	0	Complete primary	1	1	1	1	1	Urban	Urban	Urban	Urban
1076	-22.53264074	17.0444717	60401020	Khomasdal North	9	Female	35 - 39	0	0	1	0	1	1	Complete secondary	1	1	1	1	1	Urban	Urban	Urban	Urban
1077	-22.53251097	17.04423921	60401020	Khomasdal North	1	Male	25 - 29	0	0	1	0	0	0	Complete secondary	1	1	1	1	1	Urban	Urban	Urban	Urban
1078	-22.53260829	17.04417973	60401020	Khomasdal North	1	Female	35 - 39	0	0	0	0	0	0	Complete secondary	1	1	1	1	1	Urban	Urban	Urban	Urban
1079	-22.53267858	17.04408241	60401020	Khomasdal North	1	Female	15 - 19	0	0	0	0	0	0	Complete primary	1	1	1	1	1	Urban	Urban	Urban	Urban
1080	-22.5327705	17.04396887	60401020	Khomasdal North	6	Female	40 - 44	0	0	0	0	0	1	Complete secondary	1	1	1	1	1	Urban	Urban	Urban	Urban
1081	-22.53283538	17.04387155	60401020	Khomasdal North	3	Female	25 - 29	0	0	0	0	0	0	Complete primary	1	1	1	1	1	Urban	Urban	Urban	Urban
1082	-22.5329327	17.04377963	60401020	Khomasdal North	6	Male	35 - 39	0	0	0	0	0	1	Complete tertiary	1	1	1	1	1	Urban	Urban	Urban	Urban
1083	-22.5330084	17.04369312	60401020	Khomasdal North	6	Male	45 - 49	0	0	0	0	0	1	Complete tertiary	1	1	1	1	1	Urban	Urban	Urban	Urban
1084	-22.5330895	17.04361743	60401020	Khomasdal North	8	Female	50 - 54	0	0	0	0	1	1	Complete tertiary	1	1	1	1	1	Urban	Urban	Urban	Urban
1085	-22.53317601	17.04354173	60401020	Khomasdal North	1	Female	25 - 29	0	0	0	0	0	0	Complete secondary	1	1	1	1	1	Urban	Urban	Urban	Urban
1086	-22.53326793	17.04345522	60401020	Khomasdal North	1	Male	30 - 34	0	0	0	0	0	0	Complete primary	1	1	1	1	1	Urban	Urban	Urban	Urban
1087	-22.53275969	17.04426624	60401020	Khomasdal North	5	Female	45 - 49	0	0	0	0	0	0	Complete primary	1	1	1	1	1	Urban	Urban	Urban	Urban
1088	-22.53286242	17.04417973	60401020	Khomasdal North	3	Female	45 - 49	0	0	1	0	0	0	Incomplete primary	1	1	1	1	1	Urban	Urban	Urban	Urban
1089	-22.53294892	17.04401753	60401020	Khomasdal North	3	Female	55 - 59	0	0	1	0	0	0	Complete primary	1	1	1	1	1	Urban	Urban	Urban	Urban
1090	-22.53307328	17.04389858	60401020	Khomasdal North	5	Female	30 - 34	0	0	0	0	0	1	Complete secondary	1	1	1	1	1	Urban	Urban	Urban	Urban
1091	-22.53314357	17.0438391	60401020	Khomasdal North	4	Male	25 - 29	0	0	1	0	0	0	Complete tertiary	1	1	1	1	0	Urban	Urban	Urban	Urban
1092	-22.53318682	17.04377963	60401020	Khomasdal North	8	Male	25 - 29	0	0	0	0	1	0	Complete tertiary	1	1	1	1	0	Urban	Urban	Urban	Urban
1093	-22.53325711	17.04366609	60401020	Khomasdal North	1	Male	40 - 44	0	0	0	0	0	0	Complete primary	1	1	1	1	1	Urban	Urban	Urban	Urban
1094	-22.53335443	17.04352551	60401020	Khomasdal North	3	Male	25 - 29	0	0	0	0	0	0	Complete tertiary	1	1	1	1	1	Urban	Urban	Urban	Urban
1095	-22.53302462	17.04472582	60401020	Khomasdal North	7	Male	40 - 44	1	0	0	0	0	0	Complete secondary	1	1	1	1	1	Urban	Urban	Urban	Urban
1096	-22.5330895	17.04461228	60401020	Khomasdal North	3	Male	35 - 39	0	0	1	0	0	1	Complete primary	1	1	1	1	1	Urban	Urban	Urban	Urban
1097	-22.5332463	17.04425002	60401020	Khomasdal North	7	Male	40 - 44	0	0	1	0	0	1	Complete tertiary	1	1	1	1	1	Urban	Urban	Urban	Urban
1098	-22.53331118	17.04409322	60401020	Khomasdal North	4	Male	30 - 34	0	0	1	0	1	0	Complete primary	1	1	1	1	1	Urban	Urban	Urban	Urban
1099	-22.5334031	17.04401212	60401020	Khomasdal North	9	Female	40 - 44	0	0	0	0	0	1	Complete tertiary	1	1	1	1	1	Urban	Urban	Urban	Urban
1100	-22.5334842	17.04395265	60401020	Khomasdal North	2	Male	40 - 44	0	0	0	0	0	0	Complete tertiary	1	1	1	1	1	Urban	Urban	Urban	Urban
1101	-22.53357611	17.04382829	60401020	Khomasdal North	3	Male	45 - 49	0	0	0	0	0	0	Complete tertiary	1	1	1	1	1	Urban	Urban	Urban	Urban
1102	-22.53370588	17.04389858	60401020	Khomasdal North	5	Female	55 - 59	0	0	0	0	0	0	Complete tertiary	1	1	1	1	1	Urban	Urban	Urban	Urban
1103	-22.5337221	17.04401753	60401020	Khomasdal North	2	Female	45 - 49	0	0	1	0	0	0	Complete primary	1	1	1	1	1	Urban	Urban	Urban	Urban
1104	-22.53379779	17.04417973	60401020	Khomasdal North	1	Male	60 - 64	0	1	0	0	0	0	Complete primary	1	1	1	1	1	Urban	Urban	Urban	Urban
1105	-22.53359233	17.04410944	60401020	Khomasdal North	2	Male	30 - 34	0	0	1	0	0	0	Complete tertiary	1	1	1	1	1	Urban	Urban	Urban	Urban
1106	-22.53349501	17.04425002	60401020	Khomasdal North	5	Male	30 - 34	0	1	0	0	0	1	Complete secondary	1	1	1	1	1	Urban	Urban	Urban	Urban
1107	-22.53348961	17.04439601	60401020	Khomasdal North	7	Male	40 - 44	0	0	0	0	0	0	Complete tertiary	1	1	1	1	1	Urban	Urban	Urban	Urban
1108	-22.53333281	17.04443385	60401020	Khomasdal North	4	Female	55 - 59	0	0	0	0	0	0	Incomplete primary	1	1	1	1	1	Urban	Urban	Urban	Urban
1109	-22.53346798	17.04481233	60401020	Khomasdal North	9	Female	35 - 39	0	0	0	0	1	1	Complete secondary	1	1	1	1	1	Urban	Urban	Urban	Urban
1110	-22.5336464	17.04485558	60401020	Khomasdal North	4	Male	25 - 29	0	0	1	0	0	1	Complete secondary	1	1	1	1	0	Urban	Urban	Urban	Urban
1111	-22.53381942	17.04492047	60401020	Khomasdal North	2	Male	20 - 24	0	0	1	0	0	0	Complete primary	1	1	1	1	1	Urban	Urban	Urban	Urban
1112	-22.53390052	17.04476367	60401020	Khomasdal North	3	Male	25 - 29	0	0	1	0	0	1	Complete secondary	1	1	1	1	1	Urban	Urban	Urban	Urban
1113	-22.53374373	17.04469338	60401020	Khomasdal North	5	Male	45 - 49	0	0	0	0	0	1	No formal	1	1	1	1	1	Urban	Urban	Urban	Urban
1114	-22.53375454	17.04456902	60401020	Khomasdal North	5	Female	40 - 44	0	0	0	0	0	0	Complete primary	1	1	1	1	0	Urban	Urban	Urban	Urban
1115	-22.53387349	17.04440141	60401020	Khomasdal North	7	Male	40 - 44	0	0	0	0	0	0	Complete primary	1	1	1	1	1	Urban	Urban	Urban	Urban
1116	-22.53392756	17.0444717	60401020	Khomasdal North	1	Female	40 - 44	0	0	1	0	0	0	Complete tertiary	1	1	1	1	1	Urban	Urban	Urban	Urban
1117	-22.53398703	17.04465553	60401020	Khomasdal North	3	Male	35 - 39	0	0	0	0	0	0	Complete primary	1	1	1	1	1	Urban	Urban	Urban	Urban
1118	-22.53426819	17.04514755	60401020	Khomasdal North	2	Female	30 - 34	0	0	0	0	0	1	Complete primary	1	1	1	1	1	Urban	Urban	Urban	Urban
1119	-22.53431685	17.04507186	60401020	Khomasdal North	4	Male	35 - 39	0	0	0	0	0	1	Complete tertiary	1	1	1	1	1	Urban	Urban	Urban	Urban
1120	-22.53440336	17.04501238	60401020	Khomasdal North	3	Female	30 - 34	0	0	1	0	0	0	Complete secondary	1	1	1	1	1	Urban	Urban	Urban	Urban
1121	-22.53439254	17.04490425	60401020	Khomasdal North	6	Female	50 - 54	0	0	0	0	0	1	Complete primary	1	1	1	1	1	Urban	Urban	Urban	Urban
1122	-22.53433847	17.0447853	60401020	Khomasdal North	4	Female	30 - 34	0	0	1	0	0	1	Complete primary	1	1	1	1	1	Urban	Urban	Urban	Urban
1123	-22.53428441	17.04465013	60401020	Khomasdal North	8	Male	60 - 64	0	0	0	0	0	0	Complete primary	1	1	1	1	1	Urban	Urban	Urban	Urban
1124	-22.53428441	17.04452577	60401020	Khomasdal North	3	Male	30 - 34	0	0	0	0	0	1	Complete tertiary	1	1	1	1	1	Urban	Urban	Urban	Urban
1125	-22.53422493	17.04441223	60401020	Khomasdal North	3	Female	30 - 34	0	0	0	0	0	0	Complete tertiary	1	1	1	1	1	Urban	Urban	Urban	Urban
1126	-22.5341979	17.04428246	60401020	Khomasdal North	1	Male	40 - 44	0	0	0	0	0	0	Complete primary	1	1	1	1	1	Urban	Urban	Urban	Urban
1127	-22.53413842	17.04419595	60401020	Khomasdal North	7	Female	40 - 44	0	0	0	0	0	1	Complete primary	1	1	1	1	1	Urban	Urban	Urban	Urban
1128	-22.53409517	17.04406619	60401020	Khomasdal North	6	Male	65 - 74	0	0	0	0	0	0	Complete secondary	1	1	1	1	0	Urban	Urban	Urban	Urban
1129	-22.53406813	17.04392561	60401020	Khomasdal North	5	Female	35 - 39	0	0	0	0	1	1	Complete tertiary	1	1	1	1	1	Urban	Urban	Urban	Urban
1130	-22.53399244	17.04387695	60401020	Khomasdal North	2	Male	20 - 24	0	0	0	0	0	0	Complete primary	1	1	1	1	1	Urban	Urban	Urban	Urban
1131	-22.53396	17.04374178	60401020	Khomasdal North	10	Female	45 - 49	0	0	0	0	0	0	Incomplete primary	1	1	1	1	1	Urban	Urban	Urban	Urban
1132	-22.5338843	17.04364987	60401020	Khomasdal North	3	Female	30 - 34	0	0	0	0	0	0	Complete secondary	1	1	1	1	1	Urban	Urban	Urban	Urban
1133	-22.53378698	17.04355254	60401020	Khomasdal North	3	Female	55 - 59	0	0	0	0	0	0	Complete primary	1	1	1	1	1	Urban	Urban	Urban	Urban
1134	-22.53367884	17.04344981	60401020	Khomasdal North	4	Male	35 - 39	0	1	0	0	0	1	Complete primary	1	1	1	1	1	Urban	Urban	Urban	Urban
1135	-22.53360315	17.04337953	60401020	Khomasdal North	5	Female	45 - 49	0	0	0	0	0	0	Complete primary	1	1	1	1	1	Urban	Urban	Urban	Urban
1136	-22.53351664	17.04330924	60401020	Khomasdal North	3	Male	35 - 39	0	0	0	0	0	1	Complete primary	1	1	1	1	0	Urban	Urban	Urban	Urban
1137	-22.53344094	17.04323354	60401020	Khomasdal North	6	Male	20 - 24	0	0	0	0	0	0	Complete secondary	1	1	1	1	1	Urban	Urban	Urban	Urban
1138	-22.53072132	17.04234682	60401021	Khomasdal North	4	Male	35 - 39	0	0	0	0	0	0	Complete secondary	1	1	1	1	1	Urban	Urban	Urban	Urban
1139	-22.53080783	17.04252525	60401021	Khomasdal North	4	Female	25 - 29	0	1	0	0	0	1	Complete primary	1	1	1	1	1	Urban	Urban	Urban	Urban
1140	-22.53088352	17.04262798	60401021	Khomasdal North	4	Male	45 - 49	0	0	0	0	0	1	Complete primary	1	1	1	1	1	Urban	Urban	Urban	Urban
1141	-22.53095381	17.04274152	60401021	Khomasdal North	4	Female	35 - 39	0	0	0	0	1	0	Complete secondary	1	1	1	1	1	Urban	Urban	Urban	Urban
1142	-22.53104032	17.04283344	60401021	Khomasdal North	7	Male	40 - 44	0	0	0	0	0	1	Complete tertiary	1	1	1	1	1	Urban	Urban	Urban	Urban
1143	-22.53113764	17.04294157	60401021	Khomasdal North	4	Female	20 - 24	0	0	1	0	1	1	Complete secondary	1	1	1	1	0	Urban	Urban	Urban	Urban
1144	-22.53122415	17.04304971	60401021	Khomasdal North	4	Male	45 - 49	0	0	0	0	0	0	Incomplete primary	1	1	1	1	1	Urban	Urban	Urban	Urban
1145	-22.53129985	17.04309837	60401021	Khomasdal North	4	Male	45 - 49	0	0	1	0	1	0	Complete primary	1	1	1	1	1	Urban	Urban	Urban	Urban
1146	-22.53137554	17.04318488	60401021	Khomasdal North	7	Male	40 - 44	0	0	0	0	0	0	Complete primary	1	1	1	1	1	Urban	Urban	Urban	Urban
1147	-22.53144042	17.04327139	60401021	Khomasdal North	4	Male	20 - 24	0	0	0	0	0	0	Complete tertiary	1	1	1	1	1	Urban	Urban	Urban	Urban
1148	-22.53084567	17.04222787	60401021	Khomasdal North	5	Female	40 - 44	0	0	0	0	0	0	Complete secondary	1	1	1	1	1	Urban	Urban	Urban	Urban
1149	-22.53100247	17.04231979	60401021	Khomasdal North	1	Female	20 - 24	0	0	0	0	0	0	Complete secondary	1	1	1	1	1	Urban	Urban	Urban	Urban
1150	-22.53106735	17.04249281	60401021	Khomasdal North	2	Male	30 - 34	0	0	0	0	0	0	Complete primary	1	1	1	1	1	Urban	Urban	Urban	Urban
1151	-22.53112683	17.04258472	60401021	Khomasdal North	2	Female	30 - 34	0	0	1	0	0	1	Complete secondary	1	1	1	1	1	Urban	Urban	Urban	Urban
1152	-22.53120252	17.04266042	60401021	Khomasdal North	6	Female	50 - 54	0	0	0	0	0	1	Complete primary	1	1	1	1	1	Urban	Urban	Urban	Urban
1153	-22.53128363	17.04273611	60401021	Khomasdal North	2	Male	30 - 34	0	0	0	0	0	1	Complete primary	1	1	1	1	1	Urban	Urban	Urban	Urban
1154	-22.53140258	17.04281181	60401021	Khomasdal North	4	Female	35 - 39	0	0	1	0	1	0	Complete primary	1	1	1	1	1	Urban	Urban	Urban	Urban
1155	-22.53151071	17.0428821	60401021	Khomasdal North	1	Male	20 - 24	0	0	0	0	0	0	Complete primary	1	1	1	1	1	Urban	Urban	Urban	Urban
1156	-22.53158641	17.04297401	60401021	Khomasdal North	4	Female	40 - 44	0	0	1	0	1	0	Complete tertiary	1	1	1	1	1	Urban	Urban	Urban	Urban
1157	-22.53162426	17.04307134	60401021	Khomasdal North	1	Male	25 - 29	0	0	1	0	0	0	No formal	1	1	1	1	1	Urban	Urban	Urban	Urban
1158	-22.53171076	17.04301727	60401021	Khomasdal North	7	Female	30 - 34	0	0	1	0	1	1	Complete primary	1	1	1	1	0	Urban	Urban	Urban	Urban
1159	-22.53098084	17.04219543	60401021	Khomasdal North	1	Female	45 - 49	0	0	1	0	0	0	Complete secondary	1	1	1	1	1	Urban	Urban	Urban	Urban
1160	-22.53108357	17.04215218	60401021	Khomasdal North	4	Female	40 - 44	0	0	1	0	0	0	Complete secondary	1	1	1	1	1	Urban	Urban	Urban	Urban
1161	-22.53121334	17.04206567	60401021	Khomasdal North	6	Male	40 - 44	0	0	0	0	0	1	Complete tertiary	1	1	1	1	0	Urban	Urban	Urban	Urban
1162	-22.53134851	17.04203323	60401021	Khomasdal North	5	Male	35 - 39	0	0	0	0	0	0	Complete tertiary	1	1	1	1	1	Urban	Urban	Urban	Urban
1163	-22.53140258	17.04198457	60401021	Khomasdal North	4	Male	45 - 49	0	0	0	0	0	0	Complete tertiary	1	1	1	1	1	Urban	Urban	Urban	Urban
1164	-22.53150531	17.04191428	60401021	Khomasdal North	8	Female	50 - 54	0	0	0	0	0	0	Complete primary	1	1	1	1	1	Urban	Urban	Urban	Urban
1165	-22.53162426	17.04194131	60401021	Khomasdal North	7	Male	55 - 59	0	0	0	0	0	1	Complete primary	1	1	1	1	1	Urban	Urban	Urban	Urban
1166	-22.53171617	17.04200079	60401021	Khomasdal North	2	Female	35 - 39	0	0	0	0	0	0	Complete tertiary	1	1	1	1	1	Urban	Urban	Urban	Urban
1167	-22.53187297	17.04202242	60401021	Khomasdal North	5	Female	35 - 39	0	0	0	0	0	1	Complete primary	1	1	1	1	1	Urban	Urban	Urban	Urban
1168	-22.53199192	17.04211433	60401021	Khomasdal North	2	Female	20 - 24	0	0	0	0	0	0	Complete secondary	1	1	1	1	1	Urban	Urban	Urban	Urban
1169	-22.53208383	17.04213596	60401021	Khomasdal North	12	Male	45 - 49	0	0	0	0	0	1	Complete primary	1	1	1	1	1	Urban	Urban	Urban	Urban
1170	-22.53217575	17.04217381	60401021	Khomasdal North	1	Male	30 - 34	0	0	1	0	0	0	Complete secondary	1	1	1	1	1	Urban	Urban	Urban	Urban
1171	-22.53226226	17.04219543	60401021	Khomasdal North	3	Male	30 - 34	0	1	0	0	0	0	Complete secondary	1	1	1	1	1	Urban	Urban	Urban	Urban
1172	-22.53238662	17.04221165	60401021	Khomasdal North	3	Female	30 - 34	0	0	0	0	0	1	Complete secondary	1	1	1	1	1	Urban	Urban	Urban	Urban
1173	-22.53250016	17.04224409	60401021	Khomasdal North	6	Female	35 - 39	0	0	0	0	0	0	Complete secondary	1	1	1	1	1	Urban	Urban	Urban	Urban
1174	-22.53262992	17.04241171	60401021	Khomasdal North	7	Female	40 - 44	0	0	1	0	1	1	Complete tertiary	1	1	1	1	1	Urban	Urban	Urban	Urban
1175	-22.53135391	17.04234142	60401021	Khomasdal North	6	Female	30 - 34	0	0	1	0	1	0	Complete secondary	1	1	1	1	1	Urban	Urban	Urban	Urban
1176	-22.53144583	17.04238467	60401021	Khomasdal North	3	Female	45 - 49	0	0	0	0	0	0	Complete secondary	1	1	1	1	1	Urban	Urban	Urban	Urban
1177	-22.53151071	17.04251984	60401021	Khomasdal North	7	Female	40 - 44	0	0	0	0	1	0	Complete primary	1	1	1	1	1	Urban	Urban	Urban	Urban
1178	-22.53165129	17.04257932	60401021	Khomasdal North	4	Male	35 - 39	0	0	1	0	0	1	Complete secondary	1	1	1	1	1	Urban	Urban	Urban	Urban
1179	-22.53175402	17.04260094	60401021	Khomasdal North	3	Male	20 - 24	0	0	0	0	0	0	Complete tertiary	1	1	1	0	0	Urban	Urban	Urban	Urban
1180	-22.53187838	17.04268205	60401021	Khomasdal North	6	Female	50 - 54	0	0	0	0	1	1	Complete tertiary	1	1	1	1	1	Urban	Urban	Urban	Urban
1181	-22.53190541	17.0428064	60401021	Khomasdal North	1	Female	35 - 39	0	1	0	0	0	0	Complete primary	1	1	1	1	0	Urban	Urban	Urban	Urban
1182	-22.53195948	17.04275234	60401021	Khomasdal North	17	Male	55 - 59	0	0	0	0	1	1	Complete secondary	1	1	1	1	1	Urban	Urban	Urban	Urban
1183	-22.53206221	17.04265501	60401021	Khomasdal North	13	Male	50 - 54	0	0	0	0	0	1	Complete secondary	1	1	1	1	1	Urban	Urban	Urban	Urban
1184	-22.53216494	17.04259013	60401021	Khomasdal North	6	Male	45 - 49	0	0	0	0	0	1	Complete primary	1	1	1	1	1	Urban	Urban	Urban	Urban
1185	-22.53225685	17.04250362	60401021	Khomasdal North	6	Male	55 - 59	0	0	0	0	0	0	Complete primary	1	1	1	1	1	Urban	Urban	Urban	Urban
1186	-22.53206221	17.04249281	60401021	Khomasdal North	1	Female	20 - 24	0	0	0	0	0	0	Complete secondary	1	1	1	1	1	Urban	Urban	Urban	Urban
1187	-22.53190541	17.04246037	60401021	Khomasdal North	3	Male	30 - 34	0	0	0	0	0	0	Complete secondary	1	1	1	1	1	Urban	Urban	Urban	Urban
1188	-22.53176483	17.04241171	60401021	Khomasdal North	2	Female	20 - 24	0	0	0	0	0	0	Complete secondary	1	1	1	1	1	Urban	Urban	Urban	Urban
1189	-22.53167292	17.04236845	60401021	Khomasdal North	1	Male	30 - 34	0	0	1	0	0	0	Complete secondary	1	1	1	1	1	Urban	Urban	Urban	Urban
1190	-22.531581	17.04228735	60401021	Khomasdal North	1	Male	25 - 29	0	0	0	0	0	0	Complete secondary	1	1	1	1	1	Urban	Urban	Urban	Urban
1191	-22.53168373	17.04358498	60401021	Khomasdal North	6	Female	40 - 44	0	0	1	0	0	1	No formal	1	1	1	1	1	Urban	Urban	Urban	Urban
1192	-22.5317432	17.04349848	60401021	Khomasdal North	3	Female	40 - 44	0	0	0	0	0	0	Complete tertiary	1	1	1	1	1	Urban	Urban	Urban	Urban
1193	-22.5318189	17.04341737	60401021	Khomasdal North	14	Male	55 - 59	0	0	0	0	0	1	Complete primary	1	1	1	1	1	Urban	Urban	Urban	Urban
1194	-22.53194866	17.04333086	60401021	Khomasdal North	4	Female	30 - 34	0	0	0	0	1	0	Complete primary	1	1	1	1	1	Urban	Urban	Urban	Urban
1195	-22.53201895	17.04324435	60401021	Khomasdal North	7	Female	55 - 59	0	0	0	0	0	1	Complete tertiary	1	1	1	1	1	Urban	Urban	Urban	Urban
1196	-22.53212709	17.04315244	60401021	Khomasdal North	8	Male	40 - 44	0	0	1	0	0	1	Complete primary	1	1	1	1	1	Urban	Urban	Urban	Urban
1197	-22.53220278	17.04308756	60401021	Khomasdal North	1	Female	35 - 39	0	0	0	0	0	0	Complete tertiary	1	1	1	1	0	Urban	Urban	Urban	Urban
1198	-22.53227307	17.04297942	60401021	Khomasdal North	2	Female	25 - 29	0	0	0	0	0	0	Complete primary	1	1	1	1	1	Urban	Urban	Urban	Urban
1199	-22.53238121	17.04287128	60401021	Khomasdal North	2	Male	65 - 74	0	0	0	0	0	0	Incomplete primary	1	1	1	1	1	Urban	Urban	Urban	Urban
1200	-22.5324569	17.042801	60401021	Khomasdal North	5	Male	30 - 34	0	0	1	0	0	1	Complete tertiary	1	1	1	1	0	Urban	Urban	Urban	Urban
1201	-22.53260289	17.04270908	60401021	Khomasdal North	6	Male	50 - 54	0	0	0	0	0	0	Complete primary	1	1	1	1	1	Urban	Urban	Urban	Urban
1202	-22.53182431	17.04369312	60401021	Khomasdal North	3	Female	30 - 34	0	0	0	0	0	0	Complete primary	1	1	1	1	1	Urban	Urban	Urban	Urban
1203	-22.53188378	17.04363905	60401021	Khomasdal North	8	Female	45 - 49	0	0	0	0	0	0	Complete primary	1	1	1	1	1	Urban	Urban	Urban	Urban
1204	-22.5319757	17.04354714	60401021	Khomasdal North	6	Male	30 - 34	0	0	0	0	0	1	Complete tertiary	1	1	1	1	1	Urban	Urban	Urban	Urban
1205	-22.53206761	17.04347144	60401021	Khomasdal North	6	Male	50 - 54	0	1	0	0	0	0	Incomplete primary	1	1	1	1	1	Urban	Urban	Urban	Urban
1206	-22.53215412	17.04336871	60401021	Khomasdal North	9	Female	35 - 39	0	0	0	0	1	1	Complete primary	1	1	1	1	1	Urban	Urban	Urban	Urban
1207	-22.53222441	17.04328761	60401021	Khomasdal North	1	Female	20 - 24	0	0	0	0	0	0	Complete secondary	1	1	1	1	1	Urban	Urban	Urban	Urban
1208	-22.53233255	17.04320651	60401021	Khomasdal North	18	Female	50 - 54	0	0	0	0	1	1	Complete secondary	1	1	1	1	1	Urban	Urban	Urban	Urban
1209	-22.53240284	17.04314163	60401021	Khomasdal North	9	Female	35 - 39	0	0	0	0	1	0	Complete primary	1	1	1	1	1	Urban	Urban	Urban	Urban
1210	-22.53248935	17.04301727	60401021	Khomasdal North	2	Male	40 - 44	1	0	0	0	0	0	Complete tertiary	1	1	1	1	1	Urban	Urban	Urban	Urban
1211	-22.53257045	17.04294698	60401021	Khomasdal North	3	Male	35 - 39	0	0	1	0	0	1	Complete secondary	1	1	1	1	1	Urban	Urban	Urban	Urban
1212	-22.53266777	17.04289291	60401021	Khomasdal North	9	Male	40 - 44	0	0	0	0	0	0	Complete secondary	1	1	1	1	1	Urban	Urban	Urban	Urban
1213	-22.53205139	17.04394183	60401021	Khomasdal North	3	Male	35 - 39	0	0	0	0	0	1	Complete tertiary	1	1	1	1	1	Urban	Urban	Urban	Urban
1214	-22.5321379	17.04390939	60401021	Khomasdal North	4	Male	75+	0	0	0	0	0	0	Incomplete primary	1	1	1	1	1	Urban	Urban	Urban	Urban
1215	-22.53222441	17.04378504	60401021	Khomasdal North	7	Male	40 - 44	0	0	0	0	1	0	Incomplete primary	1	1	1	1	1	Urban	Urban	Urban	Urban
1216	-22.53226226	17.04372556	60401021	Khomasdal North	1	Male	30 - 34	0	0	0	0	0	0	Complete primary	1	1	1	1	1	Urban	Urban	Urban	Urban
1217	-22.5323704	17.04361743	60401021	Khomasdal North	5	Female	45 - 49	0	0	0	0	0	0	Complete secondary	1	1	1	1	1	Urban	Urban	Urban	Urban
1218	-22.53242987	17.04356336	60401021	Khomasdal North	4	Female	35 - 39	0	0	0	0	0	1	Complete tertiary	1	1	1	1	0	Urban	Urban	Urban	Urban
1219	-22.53254341	17.04348766	60401021	Khomasdal North	3	Male	55 - 59	0	0	1	0	0	0	Complete secondary	1	1	1	1	1	Urban	Urban	Urban	Urban
1220	-22.53259748	17.04341737	60401021	Khomasdal North	4	Male	20 - 24	0	0	0	0	1	1	Complete secondary	1	1	1	1	1	Urban	Urban	Urban	Urban
1221	-22.5326948	17.04326598	60401021	Khomasdal North	5	Male	35 - 39	0	0	1	0	0	1	Complete secondary	1	1	1	1	1	Urban	Urban	Urban	Urban
1222	-22.53280294	17.04316866	60401021	Khomasdal North	5	Female	50 - 54	0	0	0	0	0	0	Complete primary	1	1	1	1	0	Urban	Urban	Urban	Urban
1223	-22.53295974	17.04305512	60401021	Khomasdal North	7	Male	30 - 34	0	0	0	0	1	1	Complete tertiary	1	1	1	1	1	Urban	Urban	Urban	Urban
1224	-22.53306787	17.04314703	60401021	Khomasdal North	2	Male	30 - 34	0	0	0	0	0	0	Incomplete primary	1	1	1	1	1	Urban	Urban	Urban	Urban
1225	-22.53299218	17.0432822	60401021	Khomasdal North	3	Female	40 - 44	0	0	0	0	0	0	Incomplete primary	1	1	1	1	1	Urban	Urban	Urban	Urban
1226	-22.53287864	17.04340656	60401021	Khomasdal North	3	Female	35 - 39	0	0	0	0	0	0	Complete tertiary	1	1	1	1	1	Urban	Urban	Urban	Urban
1227	-22.5327705	17.04349307	60401021	Khomasdal North	3	Male	30 - 34	0	0	1	0	0	0	Complete primary	1	1	1	1	1	Urban	Urban	Urban	Urban
1228	-22.53265155	17.0436012	60401021	Khomasdal North	4	Female	25 - 29	0	0	0	0	1	0	Complete primary	1	1	1	1	1	Urban	Urban	Urban	Urban
1229	-22.53256504	17.04366068	60401021	Khomasdal North	7	Male	50 - 54	0	0	0	0	0	1	Complete tertiary	1	1	1	1	1	Urban	Urban	Urban	Urban
1230	-22.53250557	17.04377422	60401021	Khomasdal North	1	Female	35 - 39	0	0	0	0	0	0	No formal	1	1	1	1	1	Urban	Urban	Urban	Urban
1231	-22.53242987	17.0438391	60401021	Khomasdal North	9	Male	35 - 39	0	0	1	0	0	1	Complete primary	1	1	1	1	1	Urban	Urban	Urban	Urban
1232	-22.53235958	17.04392561	60401021	Khomasdal North	2	Female	25 - 29	0	0	0	0	0	1	Complete primary	1	1	1	1	1	Urban	Urban	Urban	Urban
1233	-22.53230011	17.04403375	60401021	Khomasdal North	4	Female	50 - 54	0	0	0	0	0	0	Complete secondary	1	1	1	1	1	Urban	Urban	Urban	Urban
1234	-22.53219197	17.04414189	60401021	Khomasdal North	5	Female	45 - 49	0	0	1	0	0	1	Complete primary	1	1	1	1	1	Urban	Urban	Urban	Urban
1235	-22.53314357	17.04290913	60401021	Khomasdal North	7	Female	40 - 44	0	0	0	0	0	1	Complete primary	1	1	1	1	1	Urban	Urban	Urban	Urban
1236	-22.53297596	17.04271989	60401021	Khomasdal North	1	Male	35 - 39	0	0	0	0	0	0	Incomplete primary	1	1	1	0	0	Urban	Urban	Urban	Urban
1237	-22.53293811	17.04254147	60401021	Khomasdal North	2	Male	25 - 29	0	0	1	0	0	0	Complete primary	1	1	1	1	1	Urban	Urban	Urban	Urban
1238	-22.53280294	17.04252525	60401021	Khomasdal North	4	Male	40 - 44	0	0	1	0	0	0	Complete primary	1	1	1	1	1	Urban	Urban	Urban	Urban
1239	-22.53273806	17.04246037	60401021	Khomasdal North	10	Female	35 - 39	0	0	0	0	0	1	Complete secondary	1	1	1	1	1	Urban	Urban	Urban	Urban
1240	-22.53321386	17.04301727	60401021	Khomasdal North	9	Female	45 - 49	0	0	0	0	0	0	Complete tertiary	1	1	1	1	1	Urban	Urban	Urban	Urban
1241	-22.53483049	17.03823224	60401022	Khomasdal North	6	Female	35 - 39	0	0	0	0	0	0	Complete secondary	1	1	1	1	0	Urban	Urban	Urban	Urban
1242	-22.53494944	17.03837822	60401022	Khomasdal North	8	Female	45 - 49	0	0	0	0	1	1	Incomplete primary	1	1	1	1	1	Urban	Urban	Urban	Urban
1243	-22.53498189	17.0385188	60401022	Khomasdal North	4	Male	45 - 49	0	0	1	0	0	1	Complete secondary	1	1	1	1	1	Urban	Urban	Urban	Urban
1244	-22.53500892	17.03867019	60401022	Khomasdal North	2	Female	35 - 39	0	0	0	0	0	0	Complete primary	1	1	1	1	1	Urban	Urban	Urban	Urban
1245	-22.53506839	17.03872967	60401022	Khomasdal North	3	Male	40 - 44	0	0	0	0	0	0	Complete tertiary	1	1	1	1	1	Urban	Urban	Urban	Urban
1246	-22.53510624	17.03884862	60401022	Khomasdal North	8	Male	45 - 49	0	0	0	0	0	0	Complete primary	1	1	1	1	1	Urban	Urban	Urban	Urban
1247	-22.53513868	17.03896216	60401022	Khomasdal North	8	Female	45 - 49	0	0	0	0	1	1	Complete primary	1	1	1	1	1	Urban	Urban	Urban	Urban
1248	-22.53516572	17.03909733	60401022	Khomasdal North	2	Male	20 - 24	0	0	0	0	0	0	Complete primary	1	1	1	1	1	Urban	Urban	Urban	Urban
1249	-22.53517112	17.03921628	60401022	Khomasdal North	4	Male	30 - 34	0	0	0	0	1	1	Complete primary	1	1	1	1	1	Urban	Urban	Urban	Urban
1250	-22.53519816	17.03935686	60401022	Khomasdal North	9	Male	55 - 59	0	0	0	0	0	0	Incomplete primary	1	1	1	1	1	Urban	Urban	Urban	Urban
1251	-22.53521978	17.03942715	60401022	Khomasdal North	4	Female	45 - 49	0	0	0	0	1	0	Complete primary	1	1	1	1	1	Urban	Urban	Urban	Urban
1252	-22.53527385	17.0395461	60401022	Khomasdal North	9	Male	50 - 54	0	0	0	0	1	0	Complete tertiary	1	1	1	1	1	Urban	Urban	Urban	Urban
1253	-22.53533333	17.03963801	60401022	Khomasdal North	8	Male	45 - 49	0	0	0	0	0	1	No formal	1	1	1	1	1	Urban	Urban	Urban	Urban
1254	-22.53536036	17.03976237	60401022	Khomasdal North	7	Male	25 - 29	0	0	0	0	1	1	Complete tertiary	1	1	1	0	0	Urban	Urban	Urban	Urban
1255	-22.53541443	17.03983266	60401022	Khomasdal North	3	Female	30 - 34	0	0	0	0	0	1	Complete primary	1	1	1	1	1	Urban	Urban	Urban	Urban
1256	-22.53545768	17.03994079	60401022	Khomasdal North	1	Male	35 - 39	0	0	0	0	0	0	Complete secondary	1	1	1	1	1	Urban	Urban	Urban	Urban
1257	-22.5354685	17.04007596	60401022	Khomasdal North	8	Female	30 - 34	0	0	0	0	1	0	Complete primary	1	1	1	1	1	Urban	Urban	Urban	Urban
1258	-22.53560367	17.04014085	60401022	Khomasdal North	5	Female	55 - 59	0	0	0	0	0	0	Complete primary	1	1	1	1	1	Urban	Urban	Urban	Urban
1259	-22.53573884	17.04017329	60401022	Khomasdal North	3	Male	55 - 59	0	0	1	0	0	0	No formal	1	1	1	1	1	Urban	Urban	Urban	Urban
1260	-22.5351549	17.03830794	60401022	Khomasdal North	7	Male	30 - 34	0	1	0	0	0	1	Complete secondary	1	1	1	1	1	Urban	Urban	Urban	Urban
1261	-22.53530089	17.03829712	60401022	Khomasdal North	5	Male	60 - 64	1	0	0	0	0	0	Complete primary	1	1	1	1	1	Urban	Urban	Urban	Urban
1262	-22.53540902	17.03829712	60401022	Khomasdal North	3	Male	25 - 29	0	0	1	0	0	1	Complete secondary	1	1	1	1	1	Urban	Urban	Urban	Urban
1263	-22.53551175	17.03827009	60401022	Khomasdal North	10	Male	60 - 64	0	0	0	0	0	1	Incomplete primary	1	1	1	1	0	Urban	Urban	Urban	Urban
1264	-22.53565233	17.03830253	60401022	Khomasdal North	1	Male	25 - 29	0	0	1	0	0	0	Complete secondary	1	1	1	1	1	Urban	Urban	Urban	Urban
1265	-22.53527385	17.03868101	60401022	Khomasdal North	5	Male	45 - 49	0	0	0	0	0	1	Complete primary	1	1	1	1	1	Urban	Urban	Urban	Urban
1266	-22.53543065	17.03865938	60401022	Khomasdal North	3	Female	60 - 64	0	0	0	0	0	0	Incomplete primary	1	1	1	1	1	Urban	Urban	Urban	Urban
1267	-22.53552797	17.03862694	60401022	Khomasdal North	1	Female	40 - 44	0	0	1	0	0	0	Complete tertiary	1	1	1	1	1	Urban	Urban	Urban	Urban
1268	-22.53565774	17.03863234	60401022	Khomasdal North	6	Female	20 - 24	0	0	0	0	0	0	Complete tertiary	1	1	1	1	1	Urban	Urban	Urban	Urban
1269	-22.53582535	17.0385945	60401022	Khomasdal North	2	Female	25 - 29	0	0	0	0	0	0	Complete secondary	1	1	1	1	1	Urban	Urban	Urban	Urban
1270	-22.53536577	17.03885402	60401022	Khomasdal North	4	Male	30 - 34	0	0	1	0	0	0	Complete tertiary	1	1	1	1	1	Urban	Urban	Urban	Urban
1271	-22.5353928	17.03901082	60401022	Khomasdal North	5	Female	50 - 54	0	0	0	0	1	1	Complete primary	1	1	1	1	1	Urban	Urban	Urban	Urban
1272	-22.53550635	17.03893513	60401022	Khomasdal North	2	Female	50 - 54	0	0	0	0	0	0	Complete primary	1	1	1	1	1	Urban	Urban	Urban	Urban
1273	-22.53566314	17.0388378	60401022	Khomasdal North	2	Male	35 - 39	0	0	0	0	0	0	Complete primary	1	1	1	1	1	Urban	Urban	Urban	Urban
1274	-22.53574425	17.03882699	60401022	Khomasdal North	4	Female	35 - 39	0	0	1	0	0	0	Complete primary	1	1	1	1	1	Urban	Urban	Urban	Urban
1275	-22.53585779	17.0388324	60401022	Khomasdal North	2	Male	55 - 59	0	0	0	0	0	0	Complete tertiary	1	1	1	1	0	Urban	Urban	Urban	Urban
1276	-22.53545768	17.03932982	60401022	Khomasdal North	2	Male	55 - 59	0	0	0	0	0	1	Incomplete primary	1	1	1	1	1	Urban	Urban	Urban	Urban
1277	-22.53553338	17.03944877	60401022	Khomasdal North	4	Male	25 - 29	0	0	0	0	0	1	Complete primary	1	1	1	1	1	Urban	Urban	Urban	Urban
1278	-22.53559826	17.03928657	60401022	Khomasdal North	7	Male	55 - 59	0	0	0	0	0	1	Complete tertiary	1	1	1	1	1	Urban	Urban	Urban	Urban
1279	-22.53566314	17.03922709	60401022	Khomasdal North	4	Female	35 - 39	0	0	0	0	0	0	Complete secondary	1	1	1	1	1	Urban	Urban	Urban	Urban
1280	-22.53576587	17.03920006	60401022	Khomasdal North	7	Female	35 - 39	0	0	0	0	1	1	Complete primary	1	1	1	1	1	Urban	Urban	Urban	Urban
1281	-22.5359443	17.03909733	60401022	Khomasdal North	3	Male	25 - 29	0	0	0	0	0	0	Complete secondary	1	1	1	1	1	Urban	Urban	Urban	Urban
1282	-22.53600377	17.0390703	60401022	Khomasdal North	7	Female	35 - 39	0	1	0	0	1	1	Incomplete primary	1	1	1	1	1	Urban	Urban	Urban	Urban
1283	-22.53564692	17.03943796	60401022	Khomasdal North	5	Female	Oct-14	0	0	0	0	0	0	Incomplete primary	1	1	1	1	1	Urban	Urban	Urban	Urban
1284	-22.53566855	17.03957313	60401022	Khomasdal North	7	Female	40 - 44	0	0	0	0	1	1	Incomplete primary	1	1	1	1	1	Urban	Urban	Urban	Urban
1285	-22.53575506	17.03982184	60401022	Khomasdal North	4	Male	35 - 39	0	0	0	0	0	1	Complete primary	1	1	1	1	0	Urban	Urban	Urban	Urban
1286	-22.53577128	17.03971911	60401022	Khomasdal North	5	Female	35 - 39	0	0	0	0	1	1	Complete tertiary	1	1	1	1	1	Urban	Urban	Urban	Urban
1287	-22.53584698	17.03956772	60401022	Khomasdal North	6	Male	65 - 74	0	0	0	0	0	0	No formal	1	1	1	1	1	Urban	Urban	Urban	Urban
1288	-22.5358632	17.0394704	60401022	Khomasdal North	2	Male	30 - 34	0	0	0	0	0	0	Complete secondary	1	1	1	1	1	Urban	Urban	Urban	Urban
1289	-22.53591186	17.03935145	60401022	Khomasdal North	10	Female	60 - 64	0	0	0	0	1	1	Complete primary	1	1	1	1	1	Urban	Urban	Urban	Urban
1290	-22.53604703	17.03925953	60401022	Khomasdal North	1	Male	20 - 24	0	0	0	0	0	0	Complete primary	1	1	1	1	1	Urban	Urban	Urban	Urban
1291	-22.53624708	17.03952447	60401022	Khomasdal North	2	Male	35 - 39	0	0	1	0	0	0	Complete tertiary	1	1	1	1	1	Urban	Urban	Urban	Urban
1292	-22.53619842	17.03962179	60401022	Khomasdal North	9	Male	55 - 59	0	0	0	0	0	0	Incomplete primary	1	1	1	1	1	Urban	Urban	Urban	Urban
1293	-22.53616598	17.03971371	60401022	Khomasdal North	1	Male	50 - 54	0	0	0	0	0	0	Complete primary	1	1	1	1	0	Urban	Urban	Urban	Urban
1294	-22.53609569	17.03984347	60401022	Khomasdal North	2	Female	35 - 39	0	0	0	0	0	0	Complete primary	1	1	1	1	1	Urban	Urban	Urban	Urban
1295	-22.53609028	17.03996783	60401022	Khomasdal North	1	Female	40 - 44	0	0	0	0	0	0	Complete tertiary	1	1	1	1	1	Urban	Urban	Urban	Urban
1296	-22.53603621	17.04008678	60401022	Khomasdal North	2	Male	65 - 74	0	0	0	0	0	0	Incomplete primary	1	1	1	1	1	Urban	Urban	Urban	Urban
1297	-22.53598755	17.04021113	60401022	Khomasdal North	6	Male	35 - 39	0	0	1	0	0	1	Complete secondary	1	1	1	1	1	Urban	Urban	Urban	Urban
1298	-22.53592267	17.04033008	60401022	Khomasdal North	4	Female	25 - 29	0	0	0	0	1	1	Complete tertiary	1	1	1	1	1	Urban	Urban	Urban	Urban
1299	-22.53611732	17.04036252	60401022	Khomasdal North	5	Female	30 - 34	0	0	1	0	1	1	Complete tertiary	1	1	1	1	1	Urban	Urban	Urban	Urban
1300	-22.53617138	17.04023817	60401022	Khomasdal North	6	Female	75+	0	0	0	0	0	0	Complete primary	1	1	1	1	1	Urban	Urban	Urban	Urban
1301	-22.53623627	17.04009759	60401022	Khomasdal North	8	Female	45 - 49	0	0	0	0	1	0	Complete tertiary	1	1	1	1	1	Urban	Urban	Urban	Urban
1302	-22.53627411	17.04000027	60401022	Khomasdal North	7	Male	35 - 39	0	0	0	0	0	0	Complete primary	1	1	1	1	1	Urban	Urban	Urban	Urban
1303	-22.53632818	17.03991376	60401022	Khomasdal North	5	Female	60 - 64	0	0	0	0	0	0	Complete primary	1	1	1	1	1	Urban	Urban	Urban	Urban
1304	-22.53636062	17.03977859	60401022	Khomasdal North	5	Male	45 - 49	0	0	0	0	0	0	Complete primary	1	1	1	1	1	Urban	Urban	Urban	Urban
1305	-22.53640388	17.03960557	60401022	Khomasdal North	8	Female	20 - 24	0	0	0	0	1	1	Complete primary	1	1	1	1	1	Urban	Urban	Urban	Urban
1306	-22.53640388	17.03952988	60401022	Khomasdal North	5	Male	35 - 39	0	0	0	0	0	0	Complete secondary	1	1	1	1	1	Urban	Urban	Urban	Urban
1307	-22.53676613	17.03976237	60401022	Khomasdal North	3	Male	40 - 44	0	0	0	0	0	0	Complete primary	1	1	1	1	0	Urban	Urban	Urban	Urban
1308	-22.53692293	17.03984347	60401022	Khomasdal North	2	Male	35 - 39	0	0	0	0	0	0	Complete secondary	1	1	1	1	1	Urban	Urban	Urban	Urban
1309	-22.53702025	17.03984888	60401022	Khomasdal North	3	Male	20 - 24	0	0	0	0	0	0	Complete secondary	1	1	1	1	1	Urban	Urban	Urban	Urban
1310	-22.53709054	17.03990835	60401022	Khomasdal North	1	Female	25 - 29	0	0	0	0	0	0	Complete tertiary	1	1	1	1	1	Urban	Urban	Urban	Urban
1311	-22.53725275	17.03988132	60401022	Khomasdal North	1	Male	20 - 24	0	0	0	0	0	0	Complete secondary	1	1	1	1	0	Urban	Urban	Urban	Urban
1312	-22.53736629	17.03996783	60401022	Khomasdal North	2	Male	35 - 39	0	0	0	0	0	0	Complete secondary	1	1	1	1	1	Urban	Urban	Urban	Urban
1313	-22.53753931	17.04003271	60401022	Khomasdal North	4	Male	30 - 34	0	0	0	0	1	1	Complete tertiary	1	1	1	1	1	Urban	Urban	Urban	Urban
1314	-22.5376096	17.040103	60401022	Khomasdal North	2	Male	30 - 34	0	0	0	0	0	0	Complete primary	1	1	1	1	1	Urban	Urban	Urban	Urban
1315	-22.53778802	17.04011922	60401022	Khomasdal North	1	Female	40 - 44	0	0	1	0	0	0	Complete primary	1	1	1	1	1	Urban	Urban	Urban	Urban
1316	-22.53789075	17.04020573	60401022	Khomasdal North	7	Male	30 - 34	0	0	0	0	1	0	Incomplete primary	1	1	1	1	1	Urban	Urban	Urban	Urban
1317	-22.5380097	17.04022195	60401022	Khomasdal North	5	Male	50 - 54	0	0	0	0	0	0	Complete primary	1	1	1	1	1	Urban	Urban	Urban	Urban
1318	-22.5381665	17.04028142	60401022	Khomasdal North	12	Male	45 - 49	0	0	0	0	0	1	Complete primary	1	1	1	1	1	Urban	Urban	Urban	Urban
1319	-22.53827463	17.04032468	60401022	Khomasdal North	1	Female	25 - 29	0	0	0	0	0	0	Complete primary	1	1	1	1	1	Urban	Urban	Urban	Urban
1320	-22.53839899	17.04038415	60401022	Khomasdal North	2	Male	35 - 39	0	0	0	0	0	0	Complete secondary	1	1	1	1	1	Urban	Urban	Urban	Urban
1321	-22.53852335	17.04043281	60401022	Khomasdal North	2	Male	60 - 64	0	0	0	0	0	0	Complete primary	1	1	1	1	1	Urban	Urban	Urban	Urban
1322	-22.53863689	17.04044903	60401022	Khomasdal North	3	Male	25 - 29	0	0	0	0	0	0	Complete primary	1	1	1	1	1	Urban	Urban	Urban	Urban
1323	-22.53878828	17.04053014	60401022	Khomasdal North	6	Female	25 - 29	0	0	0	0	1	0	Complete primary	1	1	1	1	1	Urban	Urban	Urban	Urban
1324	-22.53885857	17.04071937	60401022	Khomasdal North	8	Male	50 - 54	0	0	0	0	0	1	Incomplete primary	1	1	1	1	1	Urban	Urban	Urban	Urban
1325	-22.5389613	17.04080588	60401022	Khomasdal North	4	Female	25 - 29	0	0	0	0	1	0	Complete tertiary	1	1	1	1	1	Urban	Urban	Urban	Urban
1326	-22.53904781	17.04098971	60401022	Khomasdal North	2	Female	40 - 44	0	0	0	0	0	0	Complete primary	1	1	1	1	1	Urban	Urban	Urban	Urban
1327	-22.53910728	17.04109244	60401022	Khomasdal North	4	Female	40 - 44	0	0	1	0	0	1	Complete secondary	1	1	1	1	1	Urban	Urban	Urban	Urban
1328	-22.53916135	17.04123302	60401022	Khomasdal North	6	Female	75+	0	0	0	0	0	1	Incomplete primary	1	1	1	1	1	Urban	Urban	Urban	Urban
1329	-22.53919379	17.04132494	60401022	Khomasdal North	5	Male	30 - 34	0	0	0	0	0	1	Complete tertiary	1	1	1	1	0	Urban	Urban	Urban	Urban
1330	-22.53924786	17.04150336	60401022	Khomasdal North	5	Female	30 - 34	0	0	0	0	0	1	Complete tertiary	1	1	1	1	0	Urban	Urban	Urban	Urban
1331	-22.53930733	17.04168179	60401022	Khomasdal North	3	Female	20 - 24	0	0	1	0	0	0	No formal	1	1	1	1	1	Urban	Urban	Urban	Urban
1332	-22.53620288	17.03692594	60401023	Khomasdal North	5	Male	60 - 64	0	0	0	0	0	1	Complete tertiary	1	1	1	1	1	Urban	Urban	Urban	Urban
1333	-22.53619597	17.0367462	60401023	Khomasdal North	4	Female	40 - 44	0	0	1	0	0	0	Complete tertiary	1	1	1	1	1	Urban	Urban	Urban	Urban
1334	-22.53621671	17.03660793	60401023	Khomasdal North	2	Male	40 - 44	0	0	1	0	0	0	Incomplete primary	1	1	1	1	1	Urban	Urban	Urban	Urban
1335	-22.53620979	17.03649041	60401023	Khomasdal North	10	Male	50 - 54	0	0	0	0	0	1	Complete primary	1	1	1	1	1	Urban	Urban	Urban	Urban
1336	-22.53625818	17.03629684	60401023	Khomasdal North	4	Male	25 - 29	0	0	0	0	0	1	Complete secondary	1	1	1	1	1	Urban	Urban	Urban	Urban
1337	-22.5362651	17.0362208	60401023	Khomasdal North	5	Male	50 - 54	0	0	0	0	0	0	Complete primary	1	1	1	1	1	Urban	Urban	Urban	Urban
1338	-22.53631349	17.03595119	60401023	Khomasdal North	1	Male	30 - 34	0	0	1	0	0	0	Complete secondary	1	1	1	1	1	Urban	Urban	Urban	Urban
1339	-22.53631349	17.03588205	60401023	Khomasdal North	2	Female	45 - 49	0	0	0	0	0	0	Complete tertiary	1	1	1	1	1	Urban	Urban	Urban	Urban
1340	-22.53641719	17.03577836	60401023	Khomasdal North	1	Male	20 - 24	0	0	1	0	0	0	Complete secondary	1	1	1	1	1	Urban	Urban	Urban	Urban
1341	-22.53639645	17.03557096	60401023	Khomasdal North	2	Male	20 - 24	0	0	0	0	0	0	Complete secondary	1	1	1	1	1	Urban	Urban	Urban	Urban
1342	-22.53645866	17.03547418	60401023	Khomasdal North	7	Female	40 - 44	0	0	0	0	0	0	Complete secondary	1	1	1	1	1	Urban	Urban	Urban	Urban
1343	-22.53654162	17.03535666	60401023	Khomasdal North	5	Female	35 - 39	0	0	0	0	0	1	Complete secondary	1	1	1	1	1	Urban	Urban	Urban	Urban
1344	-22.53659001	17.03519074	60401023	Khomasdal North	3	Male	25 - 29	0	0	1	0	0	0	Complete secondary	1	1	1	1	1	Urban	Urban	Urban	Urban
1345	-22.53667989	17.03524605	60401023	Khomasdal North	6	Female	25 - 29	0	0	0	0	0	0	Complete secondary	1	1	1	1	1	Urban	Urban	Urban	Urban
1346	-22.53673519	17.03509396	60401023	Khomasdal North	1	Female	25 - 29	0	0	0	0	0	0	Complete secondary	1	1	1	1	1	Urban	Urban	Urban	Urban
1347	-22.53690802	17.03500409	60401023	Khomasdal North	2	Female	50 - 54	0	0	0	0	0	0	Complete secondary	1	1	1	1	0	Urban	Urban	Urban	Urban
1348	-22.53708776	17.03490039	60401023	Khomasdal North	5	Male	30 - 34	0	0	0	0	0	1	Complete tertiary	1	1	1	1	1	Urban	Urban	Urban	Urban
1349	-22.53725367	17.03488656	60401023	Khomasdal North	5	Male	55 - 59	0	0	0	0	0	0	Incomplete primary	1	1	1	1	1	Urban	Urban	Urban	Urban
1350	-22.53736428	17.03487274	60401023	Khomasdal North	6	Male	55 - 59	0	0	0	0	1	0	Complete primary	1	1	1	1	1	Urban	Urban	Urban	Urban
1351	-22.53749563	17.03485891	60401023	Khomasdal North	4	Male	30 - 34	0	0	0	0	1	0	Complete secondary	1	1	1	1	1	Urban	Urban	Urban	Urban
1352	-22.53764772	17.03488656	60401023	Khomasdal North	3	Female	55 - 59	0	0	1	0	0	0	Complete primary	1	1	1	0	0	Urban	Urban	Urban	Urban
1353	-22.53781364	17.03494187	60401023	Khomasdal North	4	Male	35 - 39	0	0	0	0	0	0	Complete tertiary	1	1	1	1	0	Urban	Urban	Urban	Urban
1354	-22.53791042	17.03494878	60401023	Khomasdal North	5	Male	35 - 39	0	0	1	0	0	1	Incomplete primary	1	1	1	1	1	Urban	Urban	Urban	Urban
1355	-22.53804868	17.03496261	60401023	Khomasdal North	1	Male	20 - 24	0	0	0	0	0	0	Complete secondary	1	1	1	1	0	Urban	Urban	Urban	Urban
1356	-22.53816621	17.03496261	60401023	Khomasdal North	4	Female	25 - 29	0	0	0	0	1	1	Complete primary	1	1	1	1	0	Urban	Urban	Urban	Urban
1357	-22.53833904	17.03500409	60401023	Khomasdal North	4	Male	35 - 39	0	0	0	0	0	0	Complete tertiary	1	1	1	1	1	Urban	Urban	Urban	Urban
1358	-22.53845656	17.03500409	60401023	Khomasdal North	6	Female	30 - 34	0	0	0	0	0	0	Complete primary	1	1	1	1	1	Urban	Urban	Urban	Urban
1359	-22.53861556	17.03500409	60401023	Khomasdal North	4	Male	25 - 29	0	0	0	0	0	0	Complete tertiary	1	1	1	1	1	Urban	Urban	Urban	Urban
1360	-22.53876074	17.035011	60401023	Khomasdal North	3	Male	30 - 34	0	0	1	0	0	0	Complete tertiary	1	1	1	1	1	Urban	Urban	Urban	Urban
1361	-22.53891974	17.03500409	60401023	Khomasdal North	3	Female	30 - 34	0	0	0	0	0	1	Complete secondary	1	1	1	1	1	Urban	Urban	Urban	Urban
1362	-22.5390027	17.03499717	60401023	Khomasdal North	2	Female	30 - 34	0	0	0	0	0	0	Complete primary	1	1	1	1	1	Urban	Urban	Urban	Urban
1363	-22.5390027	17.03499717	60401023	Khomasdal North	2	Female	25 - 29	0	0	0	0	0	0	Complete tertiary	1	1	1	1	1	Urban	Urban	Urban	Urban
1364	-22.53877456	17.0352737	60401023	Khomasdal North	6	Male	60 - 64	0	0	0	0	0	0	Complete primary	1	1	1	1	1	Urban	Urban	Urban	Urban
1365	-22.53859482	17.0352737	60401023	Khomasdal North	3	Male	45 - 49	0	0	0	0	0	0	Incomplete primary	1	1	1	1	0	Urban	Urban	Urban	Urban
1366	-22.53844965	17.03523913	60401023	Khomasdal North	4	Male	60 - 64	0	0	0	0	0	0	Complete primary	1	1	1	1	1	Urban	Urban	Urban	Urban
1367	-22.53829756	17.03525987	60401023	Khomasdal North	6	Female	30 - 34	0	0	0	0	0	1	Complete tertiary	1	1	1	1	1	Urban	Urban	Urban	Urban
1368	-22.53819386	17.03528061	60401023	Khomasdal North	8	Male	55 - 59	0	0	0	0	0	0	Incomplete primary	1	1	1	1	1	Urban	Urban	Urban	Urban
1369	-22.53807634	17.03528061	60401023	Khomasdal North	3	Female	25 - 29	0	0	0	0	0	0	Complete secondary	1	1	1	1	1	Urban	Urban	Urban	Urban
1370	-22.53793116	17.03526679	60401023	Khomasdal North	10	Male	35 - 39	0	0	0	0	0	1	Complete primary	1	1	1	1	1	Urban	Urban	Urban	Urban
1371	-22.5377929	17.03523222	60401023	Khomasdal North	1	Female	20 - 24	0	0	1	0	0	0	Complete secondary	1	1	1	1	1	Urban	Urban	Urban	Urban
1372	-22.53766846	17.03520457	60401023	Khomasdal North	5	Male	30 - 34	0	0	0	0	1	1	Complete secondary	1	1	1	1	1	Urban	Urban	Urban	Urban
1373	-22.53766155	17.03528753	60401023	Khomasdal North	4	Male	40 - 44	0	0	1	0	1	0	Complete secondary	1	1	1	1	1	Urban	Urban	Urban	Urban
1374	-22.53752329	17.03526679	60401023	Khomasdal North	6	Female	50 - 54	0	0	0	0	1	1	Complete tertiary	1	1	1	1	0	Urban	Urban	Urban	Urban
1375	-22.53751637	17.03512161	60401023	Khomasdal North	4	Male	45 - 49	0	0	0	0	0	1	No formal	1	1	1	1	0	Urban	Urban	Urban	Urban
1376	-22.53741959	17.03514235	60401023	Khomasdal North	2	Female	55 - 59	0	0	0	0	0	0	Complete primary	1	1	1	1	1	Urban	Urban	Urban	Urban
1377	-22.53722602	17.03518383	60401023	Khomasdal North	3	Female	35 - 39	0	0	1	0	0	0	Complete primary	1	1	1	1	1	Urban	Urban	Urban	Urban
1378	-22.53699098	17.03530135	60401023	Khomasdal North	5	Female	60 - 64	0	0	0	0	0	0	Complete primary	1	1	1	1	1	Urban	Urban	Urban	Urban
1379	-22.53688728	17.0354327	60401023	Khomasdal North	4	Male	35 - 39	0	0	0	0	0	0	Complete tertiary	1	1	1	1	0	Urban	Urban	Urban	Urban
1380	-22.53682506	17.03551566	60401023	Khomasdal North	5	Female	60 - 64	0	0	0	0	0	0	Complete primary	1	1	1	1	1	Urban	Urban	Urban	Urban
1381	-22.53672136	17.0355917	60401023	Khomasdal North	10	Male	50 - 54	0	0	0	0	1	0	Incomplete primary	1	1	1	1	1	Urban	Urban	Urban	Urban
1382	-22.53666606	17.03579218	60401023	Khomasdal North	4	Female	45 - 49	0	0	0	0	0	1	Complete primary	1	1	1	1	1	Urban	Urban	Urban	Urban
1383	-22.53662458	17.03593045	60401023	Khomasdal North	1	Female	40 - 44	0	0	0	0	0	0	Complete primary	1	1	1	0	0	Urban	Urban	Urban	Urban
1384	-22.53659693	17.0360618	60401023	Khomasdal North	1	Male	50 - 54	0	0	0	0	0	0	Complete primary	1	1	1	1	1	Urban	Urban	Urban	Urban
1385	-22.53661767	17.0362208	60401023	Khomasdal North	1	Female	40 - 44	0	0	1	0	0	0	Complete primary	1	1	1	1	1	Urban	Urban	Urban	Urban
1386	-22.53662458	17.03635215	60401023	Khomasdal North	8	Male	20 - 24	0	0	0	0	0	0	Complete secondary	1	1	1	1	1	Urban	Urban	Urban	Urban
1387	-22.53662458	17.03653189	60401023	Khomasdal North	4	Male	20 - 24	0	0	0	0	1	0	Complete secondary	1	1	1	1	1	Urban	Urban	Urban	Urban
1388	-22.53653471	17.03651115	60401023	Khomasdal North	1	Female	25 - 29	0	0	1	0	0	0	Complete secondary	1	1	1	1	1	Urban	Urban	Urban	Urban
1389	-22.5365278	17.03664941	60401023	Khomasdal North	7	Female	50 - 54	0	0	1	0	0	0	Complete primary	1	1	1	1	1	Urban	Urban	Urban	Urban
1390	-22.53652088	17.03680841	60401023	Khomasdal North	1	Male	25 - 29	0	0	0	0	0	0	Complete secondary	1	1	1	1	1	Urban	Urban	Urban	Urban
1391	-22.53645175	17.03700889	60401023	Khomasdal North	7	Male	40 - 44	0	0	0	0	0	0	Complete primary	1	1	1	1	1	Urban	Urban	Urban	Urban
1392	-22.53828373	17.03581984	60401023	Khomasdal North	2	Female	35 - 39	0	0	0	0	0	0	Complete secondary	1	1	1	1	1	Urban	Urban	Urban	Urban
1393	-22.53832521	17.03567466	60401023	Khomasdal North	2	Male	40 - 44	0	0	1	0	0	0	Complete primary	1	1	1	1	1	Urban	Urban	Urban	Urban
1394	-22.53824917	17.03548801	60401023	Khomasdal North	3	Male	25 - 29	0	0	1	0	0	0	Complete secondary	1	1	1	1	1	Urban	Urban	Urban	Urban
1395	-22.53844273	17.03555022	60401023	Khomasdal North	1	Male	20 - 24	0	0	1	0	0	0	Complete secondary	1	1	1	1	1	Urban	Urban	Urban	Urban
1396	-22.53856717	17.03564009	60401023	Khomasdal North	4	Male	40 - 44	0	0	0	0	1	0	Complete tertiary	1	1	1	1	1	Urban	Urban	Urban	Urban
1397	-22.53867087	17.03555714	60401023	Khomasdal North	1	Male	35 - 39	0	0	1	0	0	0	Incomplete primary	1	1	1	1	1	Urban	Urban	Urban	Urban
1398	-22.53843582	17.03459621	60401023	Khomasdal North	2	Female	30 - 34	0	0	1	0	0	1	Complete tertiary	1	1	1	1	1	Urban	Urban	Urban	Urban
1399	-22.53823534	17.03456856	60401023	Khomasdal North	2	Female	50 - 54	0	0	1	0	0	0	Complete primary	1	1	1	1	1	Urban	Urban	Urban	Urban
1400	-22.53818695	17.03445795	60401023	Khomasdal North	1	Male	20 - 24	0	0	1	0	0	0	Complete secondary	1	1	1	1	1	Urban	Urban	Urban	Urban
1401	-22.53804177	17.03456856	60401023	Khomasdal North	2	Female	30 - 34	0	0	1	0	0	0	Complete secondary	1	1	1	1	0	Urban	Urban	Urban	Urban
1402	-22.53800029	17.03447869	60401023	Khomasdal North	4	Male	30 - 34	0	0	0	0	0	0	Complete primary	1	1	1	1	0	Urban	Urban	Urban	Urban
1403	-22.53784129	17.03436808	60401023	Khomasdal North	3	Male	50 - 54	0	0	0	0	0	0	Complete secondary	1	1	1	1	1	Urban	Urban	Urban	Urban
1404	-22.53787586	17.03454091	60401023	Khomasdal North	1	Male	35 - 39	0	0	0	0	0	0	Complete tertiary	1	1	1	1	1	Urban	Urban	Urban	Urban
1405	-22.53774451	17.03454091	60401023	Khomasdal North	4	Male	40 - 44	0	0	0	0	0	0	Complete primary	1	1	1	1	1	Urban	Urban	Urban	Urban
1406	-22.53767538	17.03440264	60401023	Khomasdal North	5	Female	45 - 49	0	0	0	0	0	1	No formal	1	1	1	1	0	Urban	Urban	Urban	Urban
1407	-22.53755785	17.03439573	60401023	Khomasdal North	6	Female	55 - 59	0	0	0	0	0	1	Complete primary	1	1	1	1	0	Urban	Urban	Urban	Urban
1408	-22.53755785	17.03452017	60401023	Khomasdal North	3	Female	75+	0	0	1	0	0	1	Complete primary	1	1	1	1	1	Urban	Urban	Urban	Urban
1409	-22.53741959	17.0344303	60401023	Khomasdal North	2	Male	20 - 24	0	0	0	0	0	0	Complete tertiary	1	1	1	1	0	Urban	Urban	Urban	Urban
1410	-22.53730898	17.03449943	60401023	Khomasdal North	2	Female	45 - 49	0	0	1	0	0	0	Complete tertiary	1	1	1	1	1	Urban	Urban	Urban	Urban
1411	-22.53727441	17.03437499	60401023	Khomasdal North	1	Female	35 - 39	0	0	1	0	0	0	Complete primary	1	1	1	1	0	Urban	Urban	Urban	Urban
1412	-22.53719837	17.03438191	60401023	Khomasdal North	12	Male	55 - 59	0	0	0	0	1	1	No formal	1	1	1	1	1	Urban	Urban	Urban	Urban
1413	-22.53719146	17.03449943	60401023	Khomasdal North	3	Male	45 - 49	0	0	0	0	0	0	Complete primary	1	1	1	1	1	Urban	Urban	Urban	Urban
1414	-22.53706011	17.03452708	60401023	Khomasdal North	3	Female	35 - 39	0	0	0	0	0	1	Complete primary	1	1	1	1	1	Urban	Urban	Urban	Urban
1415	-22.53702554	17.03443721	60401023	Khomasdal North	1	Male	35 - 39	0	0	1	0	0	0	Incomplete primary	1	1	1	1	0	Urban	Urban	Urban	Urban
1416	-22.53694258	17.03445104	60401023	Khomasdal North	1	Male	20 - 24	0	0	1	0	0	0	Complete secondary	1	1	1	1	1	Urban	Urban	Urban	Urban
1417	-22.5368458	17.03449252	60401023	Khomasdal North	5	Male	30 - 34	0	0	0	0	0	1	Complete tertiary	1	1	1	1	1	Urban	Urban	Urban	Urban
1418	-22.53691493	17.03456856	60401023	Khomasdal North	2	Female	25 - 29	0	0	0	0	0	0	Complete primary	1	1	1	1	1	Urban	Urban	Urban	Urban
1419	-22.53663841	17.0345893	60401023	Khomasdal North	1	Male	30 - 34	0	0	0	0	0	0	Complete secondary	1	1	1	1	1	Urban	Urban	Urban	Urban
1420	-22.53655545	17.03460313	60401023	Khomasdal North	8	Male	30 - 34	0	0	0	0	1	1	Complete tertiary	1	1	1	1	1	Urban	Urban	Urban	Urban
1421	-22.53664532	17.03472065	60401023	Khomasdal North	4	Male	50 - 54	0	0	0	0	0	0	Complete secondary	1	1	1	1	1	Urban	Urban	Urban	Urban
1422	-22.53644484	17.03463078	60401023	Khomasdal North	6	Male	35 - 39	0	0	1	0	0	0	Complete tertiary	1	1	1	1	0	Urban	Urban	Urban	Urban
1423	-22.53638262	17.03467226	60401023	Khomasdal North	5	Male	35 - 39	0	0	0	0	0	1	Complete primary	1	1	1	1	1	Urban	Urban	Urban	Urban
1424	-22.53628584	17.03494878	60401023	Khomasdal North	5	Male	35 - 39	0	0	0	0	0	0	Complete tertiary	1	1	1	1	1	Urban	Urban	Urban	Urban
1425	-22.53640336	17.03486582	60401023	Khomasdal North	5	Male	45 - 49	0	0	0	0	0	1	No formal	1	1	1	1	1	Urban	Urban	Urban	Urban
1426	-22.53645866	17.03450634	60401023	Khomasdal North	6	Female	45 - 49	0	0	0	0	0	0	Complete secondary	1	1	1	1	1	Urban	Urban	Urban	Urban
1427	-22.53657619	17.03429203	60401023	Khomasdal North	6	Female	75+	0	0	0	0	0	0	Complete primary	1	1	1	1	1	Urban	Urban	Urban	Urban
1428	-22.53664532	17.03429203	60401023	Khomasdal North	4	Male	30 - 34	0	0	0	0	0	1	Complete tertiary	1	1	1	1	1	Urban	Urban	Urban	Urban
1429	-22.53646558	17.03430586	60401023	Khomasdal North	3	Female	50 - 54	0	0	0	0	0	0	Complete primary	1	1	1	1	0	Urban	Urban	Urban	Urban
1430	-22.53672828	17.03422982	60401023	Khomasdal North	4	Female	30 - 34	0	0	0	0	0	0	Incomplete primary	1	1	1	0	0	Urban	Urban	Urban	Urban
1431	-22.5368458	17.03420216	60401023	Khomasdal North	14	Male	45 - 49	0	0	0	0	1	1	Complete primary	1	1	1	1	1	Urban	Urban	Urban	Urban
1432	-22.53698406	17.03418142	60401023	Khomasdal North	8	Male	45 - 49	0	0	0	0	0	0	Complete secondary	1	1	1	1	1	Urban	Urban	Urban	Urban
1433	-22.53708085	17.03416069	60401023	Khomasdal North	7	Male	50 - 54	0	0	1	0	0	0	Complete secondary	1	1	1	1	0	Urban	Urban	Urban	Urban
1434	-22.53721911	17.03415377	60401023	Khomasdal North	4	Male	30 - 34	0	0	0	0	0	0	Complete tertiary	1	1	1	1	1	Urban	Urban	Urban	Urban
1435	-22.53734355	17.03411229	60401023	Khomasdal North	4	Male	25 - 29	0	0	0	0	0	1	Complete secondary	1	1	1	1	1	Urban	Urban	Urban	Urban
1436	-22.53746107	17.03414686	60401023	Khomasdal North	3	Female	35 - 39	0	0	1	0	0	0	Complete primary	1	1	1	1	0	Urban	Urban	Urban	Urban
1437	-22.53748181	17.03405699	60401023	Khomasdal North	3	Male	55 - 59	0	0	0	0	0	0	Complete tertiary	1	1	1	1	0	Urban	Urban	Urban	Urban
1438	-22.53756477	17.03408464	60401023	Khomasdal North	16	Female	35 - 39	0	1	0	0	1	0	Complete secondary	1	1	1	1	1	Urban	Urban	Urban	Urban
1439	-22.5376892	17.03405699	60401023	Khomasdal North	1	Male	25 - 29	0	0	0	0	0	0	Complete tertiary	1	1	1	1	1	Urban	Urban	Urban	Urban
1440	-22.53784129	17.03407081	60401023	Khomasdal North	1	Male	20 - 24	0	0	1	0	0	0	Complete secondary	1	1	1	1	0	Urban	Urban	Urban	Urban
1441	-22.53798647	17.03403625	60401023	Khomasdal North	7	Female	30 - 34	0	0	0	0	0	1	Complete secondary	1	1	1	1	1	Urban	Urban	Urban	Urban
1442	-22.53806942	17.03396712	60401023	Khomasdal North	2	Female	25 - 29	0	0	0	0	0	1	Complete secondary	1	1	1	1	1	Urban	Urban	Urban	Urban
1443	-22.53810399	17.03405699	60401023	Khomasdal North	3	Female	40 - 44	0	0	0	0	0	0	Complete primary	1	1	1	1	1	Urban	Urban	Urban	Urban
1444	-22.53833904	17.0339602	60401023	Khomasdal North	3	Male	35 - 39	0	0	0	0	0	1	Complete primary	1	1	1	1	1	Urban	Urban	Urban	Urban
1445	-22.53849804	17.03408464	60401023	Khomasdal North	5	Male	35 - 39	0	0	1	0	0	1	No formal	1	1	1	1	1	Urban	Urban	Urban	Urban
1446	-22.53850495	17.03420908	60401023	Khomasdal North	8	Male	55 - 59	0	0	0	0	1	1	Complete secondary	1	1	1	1	1	Urban	Urban	Urban	Urban
1447	-22.53830447	17.03427821	60401023	Khomasdal North	3	Male	45 - 49	0	0	0	0	0	1	Complete tertiary	1	1	1	1	1	Urban	Urban	Urban	Urban
1448	-22.53833904	17.03435425	60401023	Khomasdal North	2	Male	25 - 29	0	0	0	0	0	0	Complete secondary	1	1	1	1	1	Urban	Urban	Urban	Urban
1449	-22.53822151	17.03398094	60401023	Khomasdal North	3	Female	40 - 44	0	0	0	0	0	1	Complete primary	1	1	1	1	1	Urban	Urban	Urban	Urban
1450	-22.53677667	17.03710568	60401024	Khomasdal North	6	Female	45 - 49	0	0	0	0	0	0	Complete primary	1	1	1	1	1	Urban	Urban	Urban	Urban
1451	-22.5367905	17.03695359	60401024	Khomasdal North	4	Male	40 - 44	0	0	1	0	0	1	Complete primary	1	1	1	1	1	Urban	Urban	Urban	Urban
1452	-22.53681815	17.03682915	60401024	Khomasdal North	5	Male	45 - 49	0	0	0	0	0	0	No formal	1	1	1	1	1	Urban	Urban	Urban	Urban
1453	-22.53683889	17.03669089	60401024	Khomasdal North	1	Female	30 - 34	0	0	0	0	0	0	Complete primary	1	1	1	1	1	Urban	Urban	Urban	Urban
1454	-22.53688728	17.03649041	60401024	Khomasdal North	2	Male	25 - 29	0	0	1	0	0	0	Complete secondary	1	1	1	1	1	Urban	Urban	Urban	Urban
1455	-22.53692184	17.03635906	60401024	Khomasdal North	4	Male	60 - 64	0	0	0	0	0	0	Incomplete primary	1	1	1	1	0	Urban	Urban	Urban	Urban
1456	-22.5369495	17.0362208	60401024	Khomasdal North	4	Male	40 - 44	0	0	0	0	1	1	Complete secondary	1	1	1	1	1	Urban	Urban	Urban	Urban
1457	-22.53696332	17.03611019	60401024	Khomasdal North	6	Male	50 - 54	0	0	0	0	0	0	Complete tertiary	1	1	1	1	1	Urban	Urban	Urban	Urban
1458	-22.53699098	17.03593736	60401024	Khomasdal North	2	Male	20 - 24	0	0	0	0	0	0	Complete secondary	1	1	1	1	0	Urban	Urban	Urban	Urban
1459	-22.53703937	17.03577144	60401024	Khomasdal North	2	Female	55 - 59	0	0	0	0	0	0	Complete primary	1	1	1	1	1	Urban	Urban	Urban	Urban
1460	-22.53714998	17.0357991	60401024	Khomasdal North	1	Male	20 - 24	0	0	0	0	0	0	Complete secondary	1	1	1	1	1	Urban	Urban	Urban	Urban
1461	-22.53717072	17.03564701	60401024	Khomasdal North	4	Female	40 - 44	0	0	1	0	0	1	Complete tertiary	1	1	1	1	1	Urban	Urban	Urban	Urban
1462	-22.53723294	17.03552257	60401024	Khomasdal North	5	Male	65 - 74	0	0	0	0	0	1	Complete secondary	1	1	1	1	1	Urban	Urban	Urban	Urban
1463	-22.53738502	17.03552948	60401024	Khomasdal North	3	Female	45 - 49	0	0	0	0	0	0	Complete tertiary	1	1	1	1	1	Urban	Urban	Urban	Urban
1464	-22.53735737	17.03570231	60401024	Khomasdal North	1	Male	15 - 19	0	0	1	0	0	0	Complete secondary	1	1	1	1	1	Urban	Urban	Urban	Urban
1465	-22.53732972	17.03583366	60401024	Khomasdal North	2	Female	30 - 34	0	0	0	0	0	0	Complete primary	1	1	1	1	1	Urban	Urban	Urban	Urban
1466	-22.53730207	17.03598575	60401024	Khomasdal North	4	Female	40 - 44	0	0	0	0	0	0	Complete tertiary	1	1	1	1	1	Urban	Urban	Urban	Urban
1467	-22.53730207	17.03612401	60401024	Khomasdal North	6	Female	45 - 49	0	0	1	0	1	1	Complete tertiary	1	1	1	1	1	Urban	Urban	Urban	Urban
1468	-22.53726059	17.03628302	60401024	Khomasdal North	2	Male	35 - 39	1	0	0	0	0	0	Complete primary	1	1	1	1	1	Urban	Urban	Urban	Urban
1469	-22.53721911	17.03642128	60401024	Khomasdal North	6	Male	65 - 74	0	0	0	0	0	0	Complete secondary	1	1	1	1	1	Urban	Urban	Urban	Urban
1470	-22.53719837	17.03655954	60401024	Khomasdal North	6	Female	45 - 49	0	0	0	0	0	0	Incomplete primary	1	1	1	1	1	Urban	Urban	Urban	Urban
1471	-22.5372122	17.03672546	60401024	Khomasdal North	3	Male	65 - 74	0	0	0	0	0	0	Complete primary	1	1	1	1	1	Urban	Urban	Urban	Urban
1472	-22.53719146	17.03684298	60401024	Khomasdal North	7	Male	45 - 49	0	0	0	0	0	0	Complete primary	1	1	1	1	1	Urban	Urban	Urban	Urban
1473	-22.53714998	17.03703655	60401024	Khomasdal North	7	Female	25 - 29	0	0	1	0	1	1	Complete primary	1	1	1	1	1	Urban	Urban	Urban	Urban
1474	-22.53710159	17.03714024	60401024	Khomasdal North	3	Male	35 - 39	0	0	0	0	0	0	Complete secondary	1	1	1	1	0	Urban	Urban	Urban	Urban
1475	-22.53701172	17.03700198	60401024	Khomasdal North	1	Male	20 - 24	0	0	0	0	0	0	Complete primary	1	1	1	1	1	Urban	Urban	Urban	Urban
1476	-22.53739885	17.03723011	60401024	Khomasdal North	4	Male	35 - 39	0	0	0	0	0	0	Complete tertiary	1	1	1	1	0	Urban	Urban	Urban	Urban
1477	-22.53741268	17.03707111	60401024	Khomasdal North	8	Male	55 - 59	0	0	1	0	0	0	Complete tertiary	1	1	1	1	1	Urban	Urban	Urban	Urban
1478	-22.53743342	17.03698816	60401024	Khomasdal North	3	Male	30 - 34	0	0	1	0	0	0	Complete tertiary	1	1	1	1	1	Urban	Urban	Urban	Urban
1479	-22.53750255	17.03682915	60401024	Khomasdal North	7	Male	45 - 49	0	0	0	0	0	1	Complete secondary	1	1	1	1	1	Urban	Urban	Urban	Urban
1480	-22.53741268	17.03682224	60401024	Khomasdal North	2	Female	25 - 29	0	0	0	0	0	1	Complete secondary	1	1	1	1	1	Urban	Urban	Urban	Urban
1481	-22.53750946	17.03664941	60401024	Khomasdal North	7	Female	35 - 39	0	1	0	0	1	1	Complete tertiary	1	1	1	1	1	Urban	Urban	Urban	Urban
1482	-22.53748872	17.03647658	60401024	Khomasdal North	2	Male	40 - 44	0	0	0	0	0	0	Complete primary	1	1	1	1	1	Urban	Urban	Urban	Urban
1483	-22.53760624	17.03647658	60401024	Khomasdal North	7	Female	40 - 44	0	0	0	0	1	1	Complete primary	1	1	1	1	1	Urban	Urban	Urban	Urban
1484	-22.53759242	17.03634523	60401024	Khomasdal North	3	Female	20 - 24	0	0	0	0	0	0	Complete secondary	1	1	1	1	1	Urban	Urban	Urban	Urban
1485	-22.53757168	17.03623462	60401024	Khomasdal North	4	Female	45 - 49	0	0	1	0	0	0	Incomplete primary	1	1	1	1	1	Urban	Urban	Urban	Urban
1486	-22.53761316	17.03589588	60401024	Khomasdal North	1	Female	40 - 44	0	0	1	0	0	0	Complete tertiary	1	1	1	1	1	Urban	Urban	Urban	Urban
1487	-22.5376892	17.03589588	60401024	Khomasdal North	5	Female	20 - 24	0	0	0	0	0	1	Complete primary	1	1	1	1	1	Urban	Urban	Urban	Urban
1488	-22.53773759	17.03581292	60401024	Khomasdal North	5	Female	35 - 39	0	0	0	0	1	1	Complete primary	1	1	1	1	1	Urban	Urban	Urban	Urban
1489	-22.53766155	17.03561936	60401024	Khomasdal North	4	Male	40 - 44	0	0	0	0	1	1	Complete primary	1	1	1	1	1	Urban	Urban	Urban	Urban
1490	-22.53773068	17.03561244	60401024	Khomasdal North	1	Male	20 - 24	0	0	0	0	0	0	Complete primary	1	1	1	1	1	Urban	Urban	Urban	Urban
1491	-22.53786203	17.03561244	60401024	Khomasdal North	5	Female	45 - 49	0	0	0	0	0	0	Complete primary	1	1	1	1	1	Urban	Urban	Urban	Urban
1492	-22.53800029	17.03562627	60401024	Khomasdal North	3	Female	55 - 59	0	0	0	0	0	0	Complete primary	1	1	1	1	1	Urban	Urban	Urban	Urban
1493	-22.53797264	17.0357991	60401024	Khomasdal North	6	Male	45 - 49	0	0	0	0	0	0	Complete primary	1	1	1	1	1	Urban	Urban	Urban	Urban
1494	-22.53797955	17.03596501	60401024	Khomasdal North	4	Male	25 - 29	0	0	0	0	1	1	Complete primary	1	1	1	1	0	Urban	Urban	Urban	Urban
1495	-22.53794499	17.03610327	60401024	Khomasdal North	4	Male	35 - 39	0	0	1	0	0	0	Complete primary	1	1	1	1	1	Urban	Urban	Urban	Urban
1496	-22.53786203	17.03625536	60401024	Khomasdal North	4	Male	35 - 39	0	0	0	0	0	0	Complete primary	1	1	1	1	1	Urban	Urban	Urban	Urban
1497	-22.53788968	17.03637289	60401024	Khomasdal North	2	Male	25 - 29	0	0	0	0	0	0	Complete secondary	1	1	1	1	0	Urban	Urban	Urban	Urban
1498	-22.53775142	17.03654571	60401024	Khomasdal North	3	Female	20 - 24	0	0	0	0	0	0	Complete secondary	1	1	1	1	1	Urban	Urban	Urban	Urban
1499	-22.53788277	17.03655954	60401024	Khomasdal North	6	Male	20 - 24	0	0	0	0	0	0	Complete primary	1	1	1	1	1	Urban	Urban	Urban	Urban
1500	-22.53773759	17.0366978	60401024	Khomasdal North	4	Male	45 - 49	0	0	0	0	0	1	No formal	1	1	1	1	1	Urban	Urban	Urban	Urban
1501	-22.5378482	17.0367462	60401024	Khomasdal North	5	Male	40 - 44	0	0	0	0	0	1	Complete primary	1	1	1	1	1	Urban	Urban	Urban	Urban
1502	-22.53779981	17.03685681	60401024	Khomasdal North	5	Male	30 - 34	0	0	1	0	0	1	Complete tertiary	1	1	1	1	1	Urban	Urban	Urban	Urban
1503	-22.53778599	17.03696742	60401024	Khomasdal North	7	Female	50 - 54	0	0	0	0	1	1	Incomplete primary	1	1	1	1	1	Urban	Urban	Urban	Urban
1504	-22.53776525	17.03713333	60401024	Khomasdal North	2	Male	20 - 24	0	0	0	0	0	0	Complete secondary	1	1	1	1	1	Urban	Urban	Urban	Urban
1505	-22.53773068	17.03727851	60401024	Khomasdal North	6	Female	20 - 24	0	0	0	0	0	0	Complete secondary	1	1	1	1	1	Urban	Urban	Urban	Urban
1506	-22.53802795	17.03731307	60401024	Khomasdal North	5	Male	30 - 34	0	0	0	0	0	1	Complete secondary	1	1	1	1	1	Urban	Urban	Urban	Urban
1507	-22.53803486	17.03715407	60401024	Khomasdal North	8	Female	55 - 59	0	0	0	0	0	0	Complete tertiary	1	1	1	1	1	Urban	Urban	Urban	Urban
1508	-22.53815929	17.03719555	60401024	Khomasdal North	5	Female	75+	0	0	0	0	0	0	Complete secondary	1	1	1	1	1	Urban	Urban	Urban	Urban
1509	-22.53809016	17.03701581	60401024	Khomasdal North	6	Male	25 - 29	0	0	0	0	1	0	Complete tertiary	1	1	1	1	1	Urban	Urban	Urban	Urban
1510	-22.53812473	17.03691211	60401024	Khomasdal North	2	Female	30 - 34	0	0	1	0	0	0	Complete secondary	1	1	1	1	1	Urban	Urban	Urban	Urban
1511	-22.53813164	17.03677385	60401024	Khomasdal North	2	Female	30 - 34	0	0	1	0	0	0	Complete primary	1	1	1	1	1	Urban	Urban	Urban	Urban
1512	-22.53814547	17.03666324	60401024	Khomasdal North	4	Female	40 - 44	0	0	0	0	0	1	Complete secondary	1	1	1	1	1	Urban	Urban	Urban	Urban
1513	-22.53818003	17.03650424	60401024	Khomasdal North	5	Male	40 - 44	0	0	0	0	1	1	Complete tertiary	1	1	1	1	1	Urban	Urban	Urban	Urban
1514	-22.53820077	17.03636597	60401024	Khomasdal North	2	Male	35 - 39	0	1	0	0	0	0	Complete tertiary	1	1	1	1	1	Urban	Urban	Urban	Urban
1515	-22.53822151	17.03620006	60401024	Khomasdal North	3	Female	75+	0	0	0	0	0	0	No formal	1	1	1	1	0	Urban	Urban	Urban	Urban
1516	-22.5385326	17.03609636	60401024	Khomasdal North	1	Male	35 - 39	0	0	0	0	0	0	Complete secondary	1	1	1	1	1	Urban	Urban	Urban	Urban
1517	-22.53854643	17.03624154	60401024	Khomasdal North	4	Male	45 - 49	0	0	0	0	0	1	Incomplete primary	1	1	1	1	1	Urban	Urban	Urban	Urban
1518	-22.53856026	17.03638671	60401024	Khomasdal North	4	Male	40 - 44	0	0	0	0	0	0	Complete primary	1	1	1	1	1	Urban	Urban	Urban	Urban
1519	-22.53840817	17.03649041	60401024	Khomasdal North	11	Female	45 - 49	0	0	0	0	1	1	Complete secondary	1	1	1	0	0	Urban	Urban	Urban	Urban
1520	-22.538581	17.03653189	60401024	Khomasdal North	5	Female	30 - 34	0	0	0	0	1	1	Complete tertiary	1	1	1	1	1	Urban	Urban	Urban	Urban
1521	-22.53848421	17.03662867	60401024	Khomasdal North	3	Female	35 - 39	0	0	0	0	0	1	Complete tertiary	1	1	1	1	1	Urban	Urban	Urban	Urban
1522	-22.53840125	17.03681533	60401024	Khomasdal North	5	Female	20 - 24	0	0	0	0	0	1	Complete secondary	1	1	1	1	1	Urban	Urban	Urban	Urban
1523	-22.53853952	17.03680841	60401024	Khomasdal North	3	Male	35 - 39	0	0	0	0	0	0	Complete tertiary	1	1	1	1	1	Urban	Urban	Urban	Urban
1524	-22.53838051	17.03698124	60401024	Khomasdal North	6	Female	30 - 34	0	0	1	0	0	0	Complete secondary	1	1	1	1	1	Urban	Urban	Urban	Urban
1525	-22.53849804	17.03699507	60401024	Khomasdal North	2	Female	20 - 24	0	0	0	0	0	0	Complete secondary	1	1	1	1	1	Urban	Urban	Urban	Urban
1526	-22.53839434	17.03710568	60401024	Khomasdal North	6	Female	50 - 54	0	0	0	0	0	0	Complete primary	1	1	1	1	1	Urban	Urban	Urban	Urban
1527	-22.53832521	17.03720246	60401024	Khomasdal North	5	Female	40 - 44	0	0	0	0	1	0	Complete secondary	1	1	1	1	1	Urban	Urban	Urban	Urban
1528	-22.53833904	17.0373822	60401024	Khomasdal North	5	Male	60 - 64	0	0	0	0	0	0	Incomplete primary	1	1	1	1	1	Urban	Urban	Urban	Urban
1529	-22.53865013	17.0374859	60401024	Khomasdal North	3	Male	30 - 34	0	0	0	0	0	0	Complete secondary	1	1	1	1	1	Urban	Urban	Urban	Urban
1530	-22.53867778	17.03736838	60401024	Khomasdal North	2	Female	30 - 34	0	0	0	0	0	0	Complete tertiary	1	1	1	1	1	Urban	Urban	Urban	Urban
1531	-22.53868469	17.03720938	60401024	Khomasdal North	1	Male	35 - 39	0	0	0	0	0	0	Complete primary	1	1	1	1	1	Urban	Urban	Urban	Urban
1532	-22.53873308	17.03709185	60401024	Khomasdal North	7	Male	60 - 64	0	0	0	0	1	0	Incomplete primary	1	1	1	1	1	Urban	Urban	Urban	Urban
1533	-22.53873308	17.03682915	60401024	Khomasdal North	3	Female	45 - 49	0	0	0	0	0	0	Complete secondary	1	1	1	0	0	Urban	Urban	Urban	Urban
1534	-22.53886443	17.03671854	60401024	Khomasdal North	3	Male	30 - 34	0	0	0	0	0	1	Complete tertiary	1	1	1	1	1	Urban	Urban	Urban	Urban
1535	-22.53886443	17.03657337	60401024	Khomasdal North	2	Male	15 - 19	0	0	0	0	0	0	Complete secondary	1	1	1	1	1	Urban	Urban	Urban	Urban
1536	-22.53882987	17.03647658	60401024	Khomasdal North	8	Female	65 - 74	0	0	0	0	1	1	Complete primary	1	1	1	1	1	Urban	Urban	Urban	Urban
1537	-22.53882987	17.03635215	60401024	Khomasdal North	4	Female	30 - 34	0	0	0	0	1	1	Incomplete primary	1	1	1	1	1	Urban	Urban	Urban	Urban
1538	-22.538899	17.0362208	60401024	Khomasdal North	6	Male	60 - 64	0	0	0	0	0	0	Complete primary	1	1	1	1	1	Urban	Urban	Urban	Urban
1539	-22.53905109	17.03613784	60401024	Khomasdal North	1	Female	40 - 44	0	1	0	0	0	0	Complete primary	1	1	1	1	1	Urban	Urban	Urban	Urban
1540	-22.53918935	17.03617932	60401024	Khomasdal North	3	Female	25 - 29	0	0	0	0	0	1	Complete tertiary	1	1	1	1	1	Urban	Urban	Urban	Urban
1541	-22.53912713	17.03641437	60401024	Khomasdal North	6	Male	40 - 44	0	1	1	0	1	1	Incomplete primary	1	1	1	1	0	Urban	Urban	Urban	Urban
1542	-22.53929996	17.03631758	60401024	Khomasdal North	5	Female	75+	1	0	0	0	0	0	Complete primary	1	1	1	1	1	Urban	Urban	Urban	Urban
1543	-22.53938983	17.03639363	60401024	Khomasdal North	4	Female	25 - 29	0	0	1	0	0	0	Complete primary	1	1	1	1	1	Urban	Urban	Urban	Urban
1544	-22.53925157	17.03650424	60401024	Khomasdal North	4	Male	35 - 39	0	0	0	0	0	0	Complete tertiary	1	1	1	1	1	Urban	Urban	Urban	Urban
1545	-22.53929996	17.03662867	60401024	Khomasdal North	6	Male	30 - 34	0	0	1	0	0	1	Complete secondary	1	1	1	1	1	Urban	Urban	Urban	Urban
1546	-22.53936909	17.03673928	60401024	Khomasdal North	4	Male	40 - 44	0	0	1	0	1	1	Incomplete primary	1	1	1	1	1	Urban	Urban	Urban	Urban
1547	-22.5394797	17.03650424	60401024	Khomasdal North	6	Male	55 - 59	0	0	1	0	0	1	Complete primary	1	1	1	1	1	Urban	Urban	Urban	Urban
1548	-22.53953501	17.03662867	60401024	Khomasdal North	2	Female	30 - 34	0	0	0	0	0	0	Complete secondary	1	1	1	1	0	Urban	Urban	Urban	Urban
1549	-22.53959031	17.03677385	60401024	Khomasdal North	5	Male	35 - 39	0	0	0	0	0	0	Complete secondary	1	1	1	1	1	Urban	Urban	Urban	Urban
1550	-22.53968018	17.03687754	60401024	Khomasdal North	3	Male	45 - 49	0	0	0	0	0	0	Complete secondary	1	1	1	1	1	Urban	Urban	Urban	Urban
1551	-22.53947279	17.03694668	60401024	Khomasdal North	2	Female	Oct-14	0	0	0	0	0	0	Incomplete primary	1	1	1	1	1	Urban	Urban	Urban	Urban
1552	-22.53948662	17.03702963	60401024	Khomasdal North	7	Female	40 - 44	0	0	0	0	1	0	Complete tertiary	1	1	1	1	1	Urban	Urban	Urban	Urban
1553	-22.53974931	17.03702272	60401024	Khomasdal North	3	Female	35 - 39	0	0	0	0	0	1	Complete tertiary	1	1	1	1	1	Urban	Urban	Urban	Urban
1554	-22.53976314	17.03711259	60401024	Khomasdal North	1	Male	30 - 34	0	0	1	0	0	0	Complete primary	1	1	1	1	1	Urban	Urban	Urban	Urban
1555	-22.53973549	17.03723011	60401024	Khomasdal North	2	Male	40 - 44	0	0	0	0	0	0	Complete tertiary	1	1	1	1	1	Urban	Urban	Urban	Urban
1556	-22.53971475	17.03739603	60401024	Khomasdal North	8	Female	40 - 44	0	0	0	0	1	1	Complete tertiary	1	1	1	1	1	Urban	Urban	Urban	Urban
1557	-22.53960414	17.03731999	60401024	Khomasdal North	4	Male	35 - 39	0	0	0	0	0	0	Complete tertiary	1	1	1	1	1	Urban	Urban	Urban	Urban
1558	-22.53959723	17.03753429	60401024	Khomasdal North	3	Female	50 - 54	0	0	0	0	0	0	Complete primary	1	1	1	1	1	Urban	Urban	Urban	Urban
1559	-22.53954192	17.03763108	60401024	Khomasdal North	11	Female	30 - 34	0	0	1	0	1	1	Incomplete primary	1	1	1	1	1	Urban	Urban	Urban	Urban
1560	-22.53950735	17.03776934	60401024	Khomasdal North	1	Female	25 - 29	0	0	0	0	0	0	Complete secondary	1	1	1	1	0	Urban	Urban	Urban	Urban
1561	-22.53936909	17.03779008	60401024	Khomasdal North	6	Male	40 - 44	0	0	0	0	1	0	Complete tertiary	1	1	1	1	1	Urban	Urban	Urban	Urban
1562	-22.53925848	17.03771403	60401024	Khomasdal North	2	Male	35 - 39	0	0	0	0	0	1	Complete tertiary	1	1	1	1	1	Urban	Urban	Urban	Urban
1563	-22.5391617	17.03760342	60401024	Khomasdal North	4	Female	55 - 59	0	1	0	0	1	1	Complete secondary	1	1	1	1	1	Urban	Urban	Urban	Urban
1564	-22.53931379	17.03750664	60401024	Khomasdal North	8	Male	40 - 44	0	0	0	0	0	1	Complete primary	1	1	1	1	1	Urban	Urban	Urban	Urban
1565	-22.53931379	17.03730616	60401024	Khomasdal North	7	Male	45 - 49	0	0	0	0	1	0	Complete primary	1	1	1	1	1	Urban	Urban	Urban	Urban
1566	-22.53947279	17.03736838	60401024	Khomasdal North	7	Male	40 - 44	0	0	0	0	1	0	Complete primary	1	1	1	1	0	Urban	Urban	Urban	Urban
1567	-22.5394244	17.03720938	60401024	Khomasdal North	9	Female	40 - 44	0	0	0	0	0	1	Complete secondary	1	1	1	1	1	Urban	Urban	Urban	Urban
1568	-22.53954883	17.03724394	60401024	Khomasdal North	3	Male	20 - 24	0	0	0	0	0	1	Complete primary	1	1	1	1	1	Urban	Urban	Urban	Urban
1569	-22.53887135	17.03754812	60401024	Khomasdal North	5	Male	30 - 34	0	0	0	0	0	1	Complete primary	1	1	1	1	1	Urban	Urban	Urban	Urban
1570	-22.538899	17.0373822	60401024	Khomasdal North	4	Female	25 - 29	0	1	1	0	1	1	Complete tertiary	1	1	1	1	1	Urban	Urban	Urban	Urban
1571	-22.53893357	17.03726468	60401024	Khomasdal North	7	Male	30 - 34	0	0	0	0	1	1	Complete primary	1	1	1	1	1	Urban	Urban	Urban	Urban
1572	-22.53894048	17.03711259	60401024	Khomasdal North	4	Female	50 - 54	0	0	0	0	1	0	Incomplete primary	1	1	1	1	1	Urban	Urban	Urban	Urban
1573	-22.53903035	17.03683607	60401024	Khomasdal North	4	Male	35 - 39	0	0	0	0	0	1	Complete primary	1	1	1	1	1	Urban	Urban	Urban	Urban
1574	-22.53903726	17.03698124	60401024	Khomasdal North	9	Female	45 - 49	0	0	0	0	0	1	Complete primary	1	1	1	1	1	Urban	Urban	Urban	Urban
1575	-22.53903726	17.03662176	60401024	Khomasdal North	1	Female	15 - 19	0	0	0	0	0	0	Complete primary	1	1	1	1	1	Urban	Urban	Urban	Urban
1576	-22.53903726	17.03640745	60401024	Khomasdal North	2	Male	40 - 44	0	0	0	0	0	0	Complete primary	1	1	1	1	1	Urban	Urban	Urban	Urban
1577	-22.53936218	17.04005067	60401025	Khomasdal North	1	Male	30 - 34	0	0	1	0	0	0	Complete secondary	1	1	1	1	1	Urban	Urban	Urban	Urban
1578	-22.53925848	17.04002993	60401025	Khomasdal North	1	Male	20 - 24	0	0	0	0	0	0	Complete primary	1	1	1	1	1	Urban	Urban	Urban	Urban
1579	-22.53914787	17.03996771	60401025	Khomasdal North	5	Female	40 - 44	0	0	1	0	1	1	Complete secondary	1	1	1	1	1	Urban	Urban	Urban	Urban
1580	-22.53906491	17.04009215	60401025	Khomasdal North	3	Male	20 - 24	0	0	0	0	0	0	Complete primary	1	1	1	1	1	Urban	Urban	Urban	Urban
1581	-22.53919626	17.03981562	60401025	Khomasdal North	4	Female	30 - 34	0	0	0	0	1	0	Complete primary	1	1	1	0	0	Urban	Urban	Urban	Urban
1582	-22.53937601	17.03987784	60401025	Khomasdal North	6	Female	75+	0	0	0	0	1	1	No formal	1	1	1	1	1	Urban	Urban	Urban	Urban
1583	-22.53950735	17.03981562	60401025	Khomasdal North	4	Female	35 - 39	0	0	0	0	1	0	Complete secondary	1	1	1	1	0	Urban	Urban	Urban	Urban
1584	-22.53925848	17.03973267	60401025	Khomasdal North	2	Male	20 - 24	0	0	1	0	0	1	Incomplete primary	1	1	1	1	1	Urban	Urban	Urban	Urban
1585	-22.53915479	17.03968428	60401025	Khomasdal North	5	Male	45 - 49	0	0	0	0	0	1	Complete tertiary	1	1	1	1	1	Urban	Urban	Urban	Urban
1586	-22.539217	17.0396428	60401025	Khomasdal North	4	Male	25 - 29	0	0	1	0	0	1	Complete tertiary	1	1	1	1	1	Urban	Urban	Urban	Urban
1587	-22.53944514	17.03967045	60401025	Khomasdal North	1	Male	30 - 34	0	0	1	0	0	0	Complete secondary	1	1	1	1	1	Urban	Urban	Urban	Urban
1588	-22.53952118	17.03960132	60401025	Khomasdal North	4	Male	25 - 29	0	0	1	0	0	0	Complete primary	1	1	1	1	1	Urban	Urban	Urban	Urban
1589	-22.53951427	17.03951836	60401025	Khomasdal North	2	Female	35 - 39	0	0	1	0	0	1	Complete primary	1	1	1	1	1	Urban	Urban	Urban	Urban
1590	-22.53955575	17.03942849	60401025	Khomasdal North	8	Male	50 - 54	0	0	1	0	0	1	Complete primary	1	1	1	1	1	Urban	Urban	Urban	Urban
1591	-22.53955575	17.03924184	60401025	Khomasdal North	6	Female	35 - 39	0	0	0	0	0	1	Complete primary	1	1	1	1	1	Urban	Urban	Urban	Urban
1592	-22.53948662	17.03909666	60401025	Khomasdal North	5	Male	45 - 49	0	0	0	0	0	1	Incomplete primary	1	1	1	1	1	Urban	Urban	Urban	Urban
1593	-22.53940366	17.03905518	60401025	Khomasdal North	4	Female	35 - 39	0	0	1	0	0	0	Complete secondary	1	1	1	1	1	Urban	Urban	Urban	Urban
1594	-22.53939674	17.03924875	60401025	Khomasdal North	6	Female	40 - 44	0	0	0	0	0	1	Incomplete primary	1	1	1	1	1	Urban	Urban	Urban	Urban
1595	-22.53936218	17.03931097	60401025	Khomasdal North	4	Male	35 - 39	0	0	0	0	1	1	Complete tertiary	1	1	1	1	1	Urban	Urban	Urban	Urban
1596	-22.53933453	17.03942158	60401025	Khomasdal North	4	Male	60 - 64	0	0	0	0	0	0	No formal	1	1	1	1	1	Urban	Urban	Urban	Urban
1597	-22.53928613	17.0395391	60401025	Khomasdal North	8	Female	65 - 74	0	1	0	0	1	1	Complete primary	1	1	1	1	1	Urban	Urban	Urban	Urban
1598	-22.53880913	17.04007141	60401025	Khomasdal North	4	Male	45 - 49	0	0	0	0	0	0	Complete secondary	1	1	1	1	1	Urban	Urban	Urban	Urban
1599	-22.53882987	17.03991932	60401025	Khomasdal North	7	Female	20 - 24	0	0	0	0	1	1	Complete secondary	1	1	1	1	1	Urban	Urban	Urban	Urban
1600	-22.53887826	17.0398018	60401025	Khomasdal North	4	Female	20 - 24	0	0	0	0	0	0	Complete tertiary	1	1	1	1	1	Urban	Urban	Urban	Urban
1601	-22.53887826	17.03968428	60401025	Khomasdal North	5	Male	40 - 44	0	0	0	0	0	0	Complete primary	1	1	1	1	1	Urban	Urban	Urban	Urban
1602	-22.53896122	17.03960823	60401025	Khomasdal North	8	Male	20 - 24	0	0	0	0	1	0	Complete secondary	1	1	1	1	0	Urban	Urban	Urban	Urban
1603	-22.5389543	17.03948379	60401025	Khomasdal North	8	Male	30 - 34	0	0	0	0	0	1	Complete primary	1	1	1	1	1	Urban	Urban	Urban	Urban
1604	-22.5389543	17.03937318	60401025	Khomasdal North	5	Male	45 - 49	0	0	0	0	0	0	Complete primary	1	1	1	1	1	Urban	Urban	Urban	Urban
1605	-22.53899578	17.03925566	60401025	Khomasdal North	12	Male	55 - 59	0	0	0	0	0	1	No formal	1	1	1	1	0	Urban	Urban	Urban	Urban
1606	-22.53903035	17.03918653	60401025	Khomasdal North	7	Female	25 - 29	0	0	0	0	1	0	Complete tertiary	1	1	1	1	1	Urban	Urban	Urban	Urban
1607	-22.53903726	17.03908283	60401025	Khomasdal North	7	Male	40 - 44	0	0	0	0	0	1	Complete secondary	1	1	1	1	1	Urban	Urban	Urban	Urban
1608	-22.539058	17.03893766	60401025	Khomasdal North	2	Male	25 - 29	0	0	0	0	0	0	Complete tertiary	1	1	1	1	1	Urban	Urban	Urban	Urban
1609	-22.5391617	17.03884779	60401025	Khomasdal North	5	Male	30 - 34	0	0	0	0	0	1	Complete secondary	1	1	1	1	1	Urban	Urban	Urban	Urban
1610	-22.5391617	17.03884779	60401025	Khomasdal North	3	Male	20 - 24	0	0	0	0	0	0	Complete secondary	1	1	1	1	1	Urban	Urban	Urban	Urban
1611	-22.5390027	17.03877866	60401025	Khomasdal North	5	Female	40 - 44	0	0	0	0	0	1	Complete primary	1	1	1	1	1	Urban	Urban	Urban	Urban
1612	-22.538899	17.03866805	60401025	Khomasdal North	3	Female	55 - 59	0	0	0	0	0	0	Complete tertiary	1	1	1	1	1	Urban	Urban	Urban	Urban
1613	-22.53885752	17.03876483	60401025	Khomasdal North	3	Male	35 - 39	0	0	1	0	0	0	Complete secondary	1	1	1	1	1	Urban	Urban	Urban	Urban
1614	-22.53887826	17.03884087	60401025	Khomasdal North	1	Male	45 - 49	0	0	0	0	0	0	Complete tertiary	1	1	1	1	1	Urban	Urban	Urban	Urban
1615	-22.53888517	17.03897222	60401025	Khomasdal North	8	Male	50 - 54	0	0	0	0	0	1	Complete primary	1	1	1	1	1	Urban	Urban	Urban	Urban
1616	-22.53885061	17.03908283	60401025	Khomasdal North	7	Female	45 - 49	0	0	0	0	1	1	Complete primary	1	1	1	1	1	Urban	Urban	Urban	Urban
1617	-22.53882295	17.03917962	60401025	Khomasdal North	2	Male	25 - 29	0	0	1	0	0	0	Incomplete primary	1	1	1	1	1	Urban	Urban	Urban	Urban
1618	-22.5387953	17.03926949	60401025	Khomasdal North	2	Female	55 - 59	0	0	0	0	0	0	Complete tertiary	1	1	1	1	1	Urban	Urban	Urban	Urban
1619	-22.53877456	17.03939392	60401025	Khomasdal North	3	Male	30 - 34	0	0	0	0	0	0	Complete primary	1	1	1	1	1	Urban	Urban	Urban	Urban
1620	-22.53871926	17.03950453	60401025	Khomasdal North	2	Male	45 - 49	0	0	0	0	0	0	Complete primary	1	1	1	1	0	Urban	Urban	Urban	Urban
1621	-22.53865013	17.03957367	60401025	Khomasdal North	8	Male	25 - 29	0	0	0	0	0	0	Complete primary	1	1	1	1	1	Urban	Urban	Urban	Urban
1622	-22.53857408	17.03967736	60401025	Khomasdal North	4	Male	Oct-14	0	0	0	0	0	0	Incomplete primary	1	1	1	1	1	Urban	Urban	Urban	Urban
1623	-22.53867778	17.03971884	60401025	Khomasdal North	6	Male	50 - 54	0	0	0	0	0	1	Complete primary	1	1	1	1	1	Urban	Urban	Urban	Urban
1624	-22.53858791	17.03975341	60401025	Khomasdal North	5	Male	40 - 44	0	0	0	0	1	0	Complete tertiary	1	1	1	1	1	Urban	Urban	Urban	Urban
1625	-22.53851186	17.03989858	60401025	Khomasdal North	1	Male	40 - 44	0	0	1	0	0	0	Complete secondary	1	1	1	1	1	Urban	Urban	Urban	Urban
1626	-22.53856717	17.04001611	60401025	Khomasdal North	5	Male	35 - 39	0	0	1	0	0	1	No formal	1	1	1	1	1	Urban	Urban	Urban	Urban
1627	-22.53868469	17.04002302	60401025	Khomasdal North	1	Female	20 - 24	0	0	0	0	0	0	Complete secondary	1	1	1	1	0	Urban	Urban	Urban	Urban
1628	-22.5381109	17.03989858	60401025	Khomasdal North	1	Male	40 - 44	0	0	0	0	0	0	Complete secondary	1	1	1	1	1	Urban	Urban	Urban	Urban
1629	-22.53817312	17.03982254	60401025	Khomasdal North	2	Female	25 - 29	0	0	0	0	0	0	Complete secondary	1	1	1	1	1	Urban	Urban	Urban	Urban
1630	-22.53822843	17.03969119	60401025	Khomasdal North	3	Male	60 - 64	0	0	0	0	0	0	No formal	1	1	1	1	1	Urban	Urban	Urban	Urban
1631	-22.5382699	17.03958749	60401025	Khomasdal North	1	Male	15 - 19	0	0	1	0	0	0	Complete secondary	1	1	1	1	1	Urban	Urban	Urban	Urban
1632	-22.53826299	17.03950453	60401025	Khomasdal North	11	Female	20 - 24	0	0	0	0	1	1	Complete primary	1	1	1	1	1	Urban	Urban	Urban	Urban
1633	-22.53833904	17.03939392	60401025	Khomasdal North	4	Female	45 - 49	0	0	0	0	0	0	Complete primary	1	1	1	1	1	Urban	Urban	Urban	Urban
1634	-22.53835978	17.0392764	60401025	Khomasdal North	2	Female	40 - 44	0	0	1	0	0	0	Complete primary	1	1	1	1	1	Urban	Urban	Urban	Urban
1635	-22.53838051	17.03918653	60401025	Khomasdal North	4	Male	25 - 29	0	0	1	0	0	1	Complete secondary	1	1	1	1	1	Urban	Urban	Urban	Urban
1636	-22.53839434	17.03911049	60401025	Khomasdal North	1	Female	20 - 24	0	0	0	0	0	0	Complete primary	1	1	1	1	1	Urban	Urban	Urban	Urban
1637	-22.5384773	17.03897914	60401025	Khomasdal North	6	Male	45 - 49	0	0	0	0	0	1	Complete primary	1	1	1	1	1	Urban	Urban	Urban	Urban
1638	-22.53851186	17.03886161	60401025	Khomasdal North	2	Female	25 - 29	0	0	1	0	0	0	Complete primary	1	1	1	1	0	Urban	Urban	Urban	Urban
1639	-22.53851186	17.03886161	60401025	Khomasdal North	3	Male	20 - 24	0	0	1	0	0	0	Complete secondary	1	1	1	1	1	Urban	Urban	Urban	Urban
1640	-22.53855334	17.03868187	60401025	Khomasdal North	4	Female	40 - 44	0	0	1	0	0	0	No formal	1	1	1	1	1	Urban	Urban	Urban	Urban
1641	-22.53858791	17.03856435	60401025	Khomasdal North	6	Male	35 - 39	0	0	0	0	0	1	Complete primary	1	1	1	1	1	Urban	Urban	Urban	Urban
1642	-22.53861556	17.03843991	60401025	Khomasdal North	2	Male	25 - 29	0	0	0	0	0	0	Complete secondary	1	1	1	1	1	Urban	Urban	Urban	Urban
1643	-22.53994288	17.03908283	60401025	Khomasdal North	5	Male	50 - 54	0	0	0	0	0	0	Complete primary	1	1	1	1	1	Urban	Urban	Urban	Urban
1644	-22.53994288	17.03908283	60401025	Khomasdal North	2	Male	50 - 54	0	0	0	0	0	0	Complete secondary	1	1	1	1	1	Urban	Urban	Urban	Urban
1645	-22.53981845	17.03914505	60401025	Khomasdal North	3	Male	40 - 44	0	0	0	0	0	0	Complete primary	1	1	1	1	1	Urban	Urban	Urban	Urban
1646	-22.53988758	17.03898605	60401025	Khomasdal North	6	Male	20 - 24	0	0	0	0	1	0	Complete secondary	1	1	1	1	1	Urban	Urban	Urban	Urban
1647	-22.53971475	17.03893074	60401025	Khomasdal North	5	Female	45 - 49	0	0	1	0	0	0	Complete tertiary	1	1	1	1	1	Urban	Urban	Urban	Urban
1648	-22.53962488	17.03882013	60401025	Khomasdal North	5	Male	35 - 39	0	0	1	0	0	1	Complete tertiary	1	1	1	1	1	Urban	Urban	Urban	Urban
1649	-22.53980462	17.038751	60401025	Khomasdal North	8	Female	15 - 19	0	0	1	0	0	0	Complete primary	1	1	1	1	0	Urban	Urban	Urban	Urban
1650	-22.53986684	17.03884779	60401025	Khomasdal North	5	Male	40 - 44	0	0	1	0	1	1	Complete secondary	1	1	1	1	1	Urban	Urban	Urban	Urban
1651	-22.53972857	17.03863348	60401025	Khomasdal North	4	Female	45 - 49	0	1	0	0	0	0	Complete primary	1	1	1	1	1	Urban	Urban	Urban	Urban
1652	-22.53965944	17.03855052	60401025	Khomasdal North	5	Male	35 - 39	0	0	0	0	0	0	Complete tertiary	1	1	1	1	1	Urban	Urban	Urban	Urban
1653	-22.5395834	17.03838461	60401025	Khomasdal North	1	Male	25 - 29	0	0	1	0	0	0	Complete secondary	1	1	1	1	1	Urban	Urban	Urban	Urban
1654	-22.53950044	17.03830856	60401025	Khomasdal North	8	Male	45 - 49	0	0	0	0	1	1	Complete primary	1	1	1	1	1	Urban	Urban	Urban	Urban
1655	-22.53941057	17.03825326	60401025	Khomasdal North	2	Male	25 - 29	0	0	0	0	0	0	Complete secondary	1	1	1	1	1	Urban	Urban	Urban	Urban
1656	-22.53929996	17.03816339	60401025	Khomasdal North	5	Male	55 - 59	0	0	0	0	0	0	Complete primary	1	1	1	1	0	Urban	Urban	Urban	Urban
1657	-22.53922392	17.03812882	60401025	Khomasdal North	2	Male	40 - 44	0	0	0	0	0	0	Complete primary	1	1	1	1	1	Urban	Urban	Urban	Urban
1658	-22.53911331	17.03810808	60401025	Khomasdal North	6	Female	20 - 24	0	0	0	0	0	1	Complete primary	1	1	1	1	1	Urban	Urban	Urban	Urban
1659	-22.53902344	17.03803204	60401025	Khomasdal North	3	Female	35 - 39	0	0	1	0	0	1	Complete secondary	1	1	1	1	1	Urban	Urban	Urban	Urban
1660	-22.53900961	17.038115	60401025	Khomasdal North	5	Male	30 - 34	0	0	0	0	0	1	Complete secondary	1	1	1	1	1	Urban	Urban	Urban	Urban
1661	-22.53894048	17.03797673	60401025	Khomasdal North	5	Female	25 - 29	0	0	0	0	0	1	Complete secondary	1	1	1	1	1	Urban	Urban	Urban	Urban
1662	-22.53885061	17.03797673	60401025	Khomasdal North	2	Female	25 - 29	0	0	1	0	0	1	Complete primary	1	1	1	1	1	Urban	Urban	Urban	Urban
1663	-22.53874691	17.03794908	60401025	Khomasdal North	8	Female	45 - 49	0	0	1	0	0	0	Complete primary	1	1	1	1	1	Urban	Urban	Urban	Urban
1664	-22.5386363	17.03790069	60401025	Khomasdal North	5	Female	45 - 49	0	0	0	0	0	0	Complete primary	1	1	1	1	1	Urban	Urban	Urban	Urban
1665	-22.5385326	17.03782464	60401025	Khomasdal North	3	Female	20 - 24	0	0	1	0	0	0	Complete primary	1	1	1	1	1	Urban	Urban	Urban	Urban
1666	-22.53843582	17.03778316	60401025	Khomasdal North	1	Male	25 - 29	0	0	0	0	0	0	Complete tertiary	1	1	1	1	1	Urban	Urban	Urban	Urban
1667	-22.53829064	17.03774169	60401025	Khomasdal North	4	Female	35 - 39	0	0	0	0	0	0	Complete secondary	1	1	1	1	1	Urban	Urban	Urban	Urban
1668	-22.53817312	17.03774169	60401025	Khomasdal North	3	Female	35 - 39	0	0	0	0	0	0	Complete tertiary	1	1	1	1	0	Urban	Urban	Urban	Urban
1669	-22.53799338	17.03767947	60401025	Khomasdal North	7	Female	35 - 39	0	0	0	0	0	1	Complete primary	1	1	1	1	1	Urban	Urban	Urban	Urban
1670	-22.53782746	17.03772095	60401025	Khomasdal North	3	Male	25 - 29	0	0	1	0	0	0	Complete tertiary	1	1	1	1	1	Urban	Urban	Urban	Urban
1671	-22.53772377	17.03765873	60401025	Khomasdal North	4	Female	30 - 34	0	0	0	0	1	1	Complete primary	1	1	1	1	1	Urban	Urban	Urban	Urban
1672	-22.53757859	17.03763108	60401025	Khomasdal North	1	Male	35 - 39	0	0	0	0	0	0	Complete primary	1	1	1	1	1	Urban	Urban	Urban	Urban
1673	-22.53743342	17.03762416	60401025	Khomasdal North	1	Male	25 - 29	0	0	0	0	0	0	Complete secondary	1	1	1	1	1	Urban	Urban	Urban	Urban
1674	-22.53730207	17.03758268	60401025	Khomasdal North	6	Male	35 - 39	0	0	0	0	0	0	Incomplete primary	1	1	1	1	0	Urban	Urban	Urban	Urban
1675	-22.53717072	17.03754812	60401025	Khomasdal North	5	Male	40 - 44	0	0	0	0	0	0	Complete secondary	1	1	1	1	1	Urban	Urban	Urban	Urban
1676	-22.53704628	17.03750664	60401025	Khomasdal North	8	Female	30 - 34	0	0	0	0	0	1	No formal	1	1	1	1	1	Urban	Urban	Urban	Urban
1677	-22.53685963	17.0374306	60401025	Khomasdal North	2	Male	25 - 29	0	0	1	0	0	0	Complete secondary	1	1	1	1	1	Urban	Urban	Urban	Urban
1678	-22.53672828	17.03744442	60401025	Khomasdal North	3	Female	25 - 29	0	0	0	0	0	1	Complete tertiary	1	1	1	1	1	Urban	Urban	Urban	Urban
1679	-22.53650706	17.03734072	60401025	Khomasdal North	5	Male	60 - 64	0	1	0	0	0	1	Complete tertiary	1	1	1	1	1	Urban	Urban	Urban	Urban
1680	-22.53952809	17.03873718	60401025	Khomasdal North	6	Male	35 - 39	0	0	0	0	0	1	Complete secondary	1	1	1	1	1	Urban	Urban	Urban	Urban
1681	-22.53948662	17.03866113	60401025	Khomasdal North	6	Male	45 - 49	0	0	1	0	0	1	Complete tertiary	1	1	1	1	1	Urban	Urban	Urban	Urban
1682	-22.5394244	17.03852978	60401025	Khomasdal North	5	Female	45 - 49	0	0	0	0	1	0	No formal	1	1	1	1	1	Urban	Urban	Urban	Urban
1683	-22.53931379	17.03847448	60401025	Khomasdal North	2	Female	15 - 19	0	0	1	0	0	0	Complete secondary	1	1	1	1	1	Urban	Urban	Urban	Urban
1684	-22.539217	17.03840535	60401025	Khomasdal North	6	Female	50 - 54	0	0	0	0	0	1	No formal	1	1	1	1	1	Urban	Urban	Urban	Urban
1685	-22.53907183	17.03833622	60401025	Khomasdal North	1	Male	30 - 34	0	0	0	0	0	0	Complete secondary	1	1	1	1	1	Urban	Urban	Urban	Urban
1686	-22.53894739	17.03825326	60401025	Khomasdal North	5	Male	45 - 49	0	0	0	0	0	1	Complete secondary	1	1	1	1	1	Urban	Urban	Urban	Urban
1687	-22.53880222	17.0381703	60401025	Khomasdal North	7	Female	50 - 54	0	0	0	0	1	1	Complete primary	1	1	1	1	1	Urban	Urban	Urban	Urban
1688	-22.53873308	17.03829474	60401025	Khomasdal North	9	Male	45 - 49	0	0	0	0	0	1	Complete primary	1	1	1	1	1	Urban	Urban	Urban	Urban
1689	-22.53860865	17.03814265	60401025	Khomasdal North	1	Male	30 - 34	0	0	1	0	0	0	Complete tertiary	1	1	1	1	1	Urban	Urban	Urban	Urban
1690	-22.53634114	17.03740294	60401025	Khomasdal North	2	Male	30 - 34	0	0	1	0	0	0	Complete secondary	1	1	1	1	0	Urban	Urban	Urban	Urban
1691	-22.53618214	17.03734072	60401025	Khomasdal North	7	Male	40 - 44	0	0	0	0	0	0	Complete primary	1	1	1	1	0	Urban	Urban	Urban	Urban
1692	-22.54050976	17.04076272	60401026	Khomasdal North	6	Female	40 - 44	0	0	0	0	0	0	Complete primary	1	1	1	1	0	Urban	Urban	Urban	Urban
1693	-22.54071715	17.04081112	60401026	Khomasdal North	4	Female	55 - 59	0	0	0	0	0	0	Complete primary	1	1	1	1	1	Urban	Urban	Urban	Urban
1694	-22.54071715	17.04058298	60401026	Khomasdal North	10	Male	35 - 39	0	0	0	0	1	1	Complete primary	1	1	1	1	1	Urban	Urban	Urban	Urban
1695	-22.54069641	17.04045163	60401026	Khomasdal North	4	Female	20 - 24	0	0	0	0	0	0	Complete secondary	1	1	1	1	1	Urban	Urban	Urban	Urban
1696	-22.54072407	17.04031337	60401026	Khomasdal North	5	Female	20 - 24	0	0	0	0	0	1	Complete tertiary	1	1	1	1	1	Urban	Urban	Urban	Urban
1697	-22.54075172	17.04013363	60401026	Khomasdal North	4	Male	25 - 29	0	0	0	0	0	0	Complete secondary	1	1	1	1	1	Urban	Urban	Urban	Urban
1698	-22.54077246	17.04001611	60401026	Khomasdal North	4	Female	20 - 24	0	0	0	0	0	1	Complete primary	1	1	1	1	1	Urban	Urban	Urban	Urban
1699	-22.54077246	17.03985019	60401026	Khomasdal North	1	Female	20 - 24	0	0	1	0	0	0	Complete secondary	1	1	1	1	1	Urban	Urban	Urban	Urban
1700	-22.54077246	17.0396981	60401026	Khomasdal North	7	Female	35 - 39	0	0	0	0	0	1	Complete secondary	1	1	1	1	1	Urban	Urban	Urban	Urban
1701	-22.54075172	17.03954601	60401026	Khomasdal North	7	Male	50 - 54	0	0	0	0	1	0	No formal	1	1	1	1	1	Urban	Urban	Urban	Urban
1702	-22.54066185	17.03938701	60401026	Khomasdal North	8	Female	75+	0	0	0	0	0	1	Incomplete primary	1	1	1	1	1	Urban	Urban	Urban	Urban
1703	-22.54061346	17.03925566	60401026	Khomasdal North	5	Female	20 - 24	0	0	0	0	1	0	Complete secondary	1	1	1	1	1	Urban	Urban	Urban	Urban
1704	-22.54055815	17.03916579	60401026	Khomasdal North	6	Female	40 - 44	0	0	1	0	0	0	Complete primary	1	1	1	1	1	Urban	Urban	Urban	Urban
1705	-22.54057198	17.0389584	60401026	Khomasdal North	4	Female	40 - 44	0	0	0	0	0	0	Complete secondary	1	1	1	1	1	Urban	Urban	Urban	Urban
1706	-22.54043371	17.0389584	60401026	Khomasdal North	5	Male	65 - 74	0	0	0	0	0	0	Complete primary	1	1	1	1	1	Urban	Urban	Urban	Urban
1707	-22.54045445	17.03884779	60401026	Khomasdal North	6	Female	60 - 64	0	0	1	0	0	1	Complete tertiary	1	1	1	1	1	Urban	Urban	Urban	Urban
1708	-22.5404268	17.03871644	60401026	Khomasdal North	3	Male	45 - 49	0	0	0	0	0	0	Complete primary	1	1	1	1	1	Urban	Urban	Urban	Urban
1709	-22.54030928	17.038751	60401026	Khomasdal North	4	Female	45 - 49	0	0	0	0	0	0	Complete primary	1	1	1	1	1	Urban	Urban	Urban	Urban
1710	-22.54024706	17.03895148	60401026	Khomasdal North	16	Female	65 - 74	0	0	0	0	1	1	Incomplete primary	1	1	1	0	0	Urban	Urban	Urban	Urban
1711	-22.54028163	17.03910357	60401026	Khomasdal North	8	Female	30 - 34	0	0	0	0	0	0	Incomplete primary	1	1	1	1	1	Urban	Urban	Urban	Urban
1712	-22.54034384	17.03924184	60401026	Khomasdal North	3	Male	35 - 39	0	0	0	0	0	0	Complete secondary	1	1	1	1	1	Urban	Urban	Urban	Urban
1713	-22.5403715	17.03942158	60401026	Khomasdal North	8	Female	75+	0	0	0	0	0	1	Complete primary	1	1	1	1	1	Urban	Urban	Urban	Urban
1714	-22.54038532	17.03951836	60401026	Khomasdal North	3	Male	50 - 54	0	0	0	0	0	0	Incomplete primary	1	1	1	1	0	Urban	Urban	Urban	Urban
1715	-22.54041297	17.0396981	60401026	Khomasdal North	5	Male	55 - 59	0	0	0	0	0	0	Complete primary	1	1	1	1	1	Urban	Urban	Urban	Urban
1716	-22.54047519	17.03984328	60401026	Khomasdal North	4	Female	25 - 29	0	0	0	0	0	1	Complete primary	1	1	1	1	1	Urban	Urban	Urban	Urban
1717	-22.54048902	17.04000919	60401026	Khomasdal North	1	Male	35 - 39	0	0	0	0	0	0	Complete secondary	1	1	1	1	1	Urban	Urban	Urban	Urban
1718	-22.54048902	17.04013363	60401026	Khomasdal North	1	Male	30 - 34	0	1	0	0	0	0	Complete primary	1	1	1	1	1	Urban	Urban	Urban	Urban
1719	-22.54043371	17.04030646	60401026	Khomasdal North	2	Male	25 - 29	0	0	0	0	0	0	Complete primary	1	1	1	1	1	Urban	Urban	Urban	Urban
1720	-22.54046137	17.04043089	60401026	Khomasdal North	2	Male	40 - 44	0	1	0	0	0	0	No formal	1	1	1	1	1	Urban	Urban	Urban	Urban
1721	-22.54046137	17.04061063	60401026	Khomasdal North	1	Female	35 - 39	0	0	0	0	0	0	Complete primary	1	1	1	1	1	Urban	Urban	Urban	Urban
1722	-22.53997053	17.03992623	60401026	Khomasdal North	10	Male	60 - 64	0	0	0	0	0	0	Incomplete primary	1	1	1	1	1	Urban	Urban	Urban	Urban
1723	-22.54008114	17.03987093	60401026	Khomasdal North	1	Female	35 - 39	0	0	0	0	0	0	Complete tertiary	1	1	1	1	1	Urban	Urban	Urban	Urban
1724	-22.54010188	17.03978797	60401026	Khomasdal North	4	Female	40 - 44	0	0	1	0	0	0	Incomplete primary	1	1	1	1	1	Urban	Urban	Urban	Urban
1725	-22.54007423	17.0396981	60401026	Khomasdal North	11	Male	45 - 49	0	0	1	0	1	1	Complete secondary	1	1	1	1	0	Urban	Urban	Urban	Urban
1726	-22.54003275	17.0395944	60401026	Khomasdal North	6	Female	30 - 34	0	0	1	0	0	0	No formal	1	1	1	1	1	Urban	Urban	Urban	Urban
1727	-22.53997053	17.03945614	60401026	Khomasdal North	9	Female	35 - 39	0	0	0	0	0	1	Complete secondary	1	1	1	1	1	Urban	Urban	Urban	Urban
1728	-22.5399014	17.03939392	60401026	Khomasdal North	9	Female	45 - 49	0	0	0	0	1	1	No formal	1	1	1	1	1	Urban	Urban	Urban	Urban
1729	-22.53998436	17.03935245	60401026	Khomasdal North	2	Male	25 - 29	0	0	0	0	0	0	Complete secondary	1	1	1	1	1	Urban	Urban	Urban	Urban
1730	-22.53986684	17.03930405	60401026	Khomasdal North	4	Female	35 - 39	0	0	0	0	0	1	Complete secondary	1	1	1	1	1	Urban	Urban	Urban	Urban
1731	-22.53995671	17.03925566	60401026	Khomasdal North	2	Male	20 - 24	0	0	0	0	0	0	Complete secondary	1	1	1	1	1	Urban	Urban	Urban	Urban
1732	-22.53973549	17.03993315	60401026	Khomasdal North	2	Female	25 - 29	0	0	1	0	0	0	Complete primary	1	1	1	1	1	Urban	Urban	Urban	Urban
1733	-22.53973549	17.03993315	60401026	Khomasdal North	2	Male	35 - 39	0	0	0	0	0	0	Complete secondary	1	1	1	1	1	Urban	Urban	Urban	Urban
1734	-22.54072407	17.03856435	60401026	Khomasdal North	2	Female	45 - 49	0	0	1	0	0	0	Complete secondary	1	1	1	1	1	Urban	Urban	Urban	Urban
1735	-22.54073098	17.03867496	60401026	Khomasdal North	4	Female	40 - 44	0	0	0	0	0	1	Complete secondary	1	1	1	1	1	Urban	Urban	Urban	Urban
1736	-22.54075172	17.03884779	60401026	Khomasdal North	5	Male	30 - 34	0	0	0	0	1	1	Incomplete primary	1	1	1	1	0	Urban	Urban	Urban	Urban
1737	-22.54078628	17.03903444	60401026	Khomasdal North	6	Male	55 - 59	0	0	0	0	0	0	Incomplete primary	1	1	1	1	1	Urban	Urban	Urban	Urban
1738	-22.54088998	17.03893766	60401026	Khomasdal North	3	Male	50 - 54	0	0	0	0	0	0	No formal	1	1	1	1	1	Urban	Urban	Urban	Urban
1739	-22.54088998	17.03874409	60401026	Khomasdal North	2	Female	25 - 29	0	0	0	0	0	0	Complete primary	1	1	1	1	1	Urban	Urban	Urban	Urban
1740	-22.54089689	17.03857817	60401026	Khomasdal North	8	Male	35 - 39	0	0	0	0	0	1	Complete secondary	1	1	1	1	1	Urban	Urban	Urban	Urban
1741	-22.54097294	17.03851596	60401026	Khomasdal North	2	Female	40 - 44	0	0	0	0	0	0	Complete primary	1	1	1	1	1	Urban	Urban	Urban	Urban
1742	-22.54097985	17.03861965	60401026	Khomasdal North	1	Male	40 - 44	0	0	0	0	0	0	Complete tertiary	1	1	1	1	1	Urban	Urban	Urban	Urban
1743	-22.54102133	17.038751	60401026	Khomasdal North	1	Male	40 - 44	0	0	0	0	0	0	Complete secondary	1	1	1	0	0	Urban	Urban	Urban	Urban
1744	-22.54106972	17.03904827	60401026	Khomasdal North	6	Male	65 - 74	0	0	0	0	0	0	Complete primary	1	1	1	1	1	Urban	Urban	Urban	Urban
1745	-22.54087615	17.03922801	60401026	Khomasdal North	5	Male	45 - 49	0	0	1	0	1	0	Complete primary	1	1	1	1	1	Urban	Urban	Urban	Urban
1746	-22.54098676	17.03923492	60401026	Khomasdal North	4	Female	55 - 59	0	0	0	0	0	0	Incomplete primary	1	1	1	1	1	Urban	Urban	Urban	Urban
1747	-22.54093837	17.0393801	60401026	Khomasdal North	4	Female	40 - 44	0	0	0	0	0	0	Complete secondary	1	1	1	1	1	Urban	Urban	Urban	Urban
1748	-22.54109046	17.03933171	60401026	Khomasdal North	2	Male	60 - 64	0	0	0	0	0	0	Complete tertiary	1	1	1	1	1	Urban	Urban	Urban	Urban
1749	-22.54106281	17.0395391	60401026	Khomasdal North	2	Male	25 - 29	0	0	1	0	0	0	Complete secondary	1	1	1	1	1	Urban	Urban	Urban	Urban
1750	-22.5410559	17.03971884	60401026	Khomasdal North	1	Female	20 - 24	0	0	1	0	0	0	Complete secondary	1	1	1	1	1	Urban	Urban	Urban	Urban
1751	-22.54106281	17.03983636	60401026	Khomasdal North	5	Male	40 - 44	0	0	0	0	0	0	Complete primary	1	1	1	1	1	Urban	Urban	Urban	Urban
1752	-22.54106972	17.04005067	60401026	Khomasdal North	6	Male	65 - 74	0	0	0	0	0	0	Complete primary	1	1	1	1	1	Urban	Urban	Urban	Urban
1753	-22.54107664	17.04016128	60401026	Khomasdal North	5	Male	25 - 29	0	1	1	0	1	1	Complete tertiary	1	1	1	1	1	Urban	Urban	Urban	Urban
1754	-22.54108355	17.04028572	60401026	Khomasdal North	2	Female	50 - 54	1	0	0	0	0	0	Complete tertiary	1	1	1	1	1	Urban	Urban	Urban	Urban
1755	-22.54108355	17.04046546	60401026	Khomasdal North	6	Female	45 - 49	0	0	0	0	0	0	Complete primary	1	1	1	1	1	Urban	Urban	Urban	Urban
1756	-22.54108355	17.04059681	60401026	Khomasdal North	7	Female	35 - 39	0	0	0	0	1	1	Complete secondary	1	1	1	1	1	Urban	Urban	Urban	Urban
1757	-22.54109046	17.04072124	60401026	Khomasdal North	14	Male	60 - 64	0	0	0	0	0	0	Complete primary	1	1	1	1	0	Urban	Urban	Urban	Urban
1758	-22.54125638	17.0407489	60401026	Khomasdal North	7	Male	45 - 49	0	0	0	0	1	1	Complete secondary	1	1	1	1	1	Urban	Urban	Urban	Urban
1759	-22.54124255	17.04063137	60401026	Khomasdal North	4	Male	40 - 44	0	0	1	0	0	1	Complete primary	1	1	1	1	0	Urban	Urban	Urban	Urban
1760	-22.54125638	17.04045855	60401026	Khomasdal North	5	Female	20 - 24	0	0	1	0	0	1	Complete primary	1	1	1	1	1	Urban	Urban	Urban	Urban
1761	-22.54127712	17.0403272	60401026	Khomasdal North	6	Female	20 - 24	0	0	0	0	0	0	Complete secondary	1	1	1	1	0	Urban	Urban	Urban	Urban
1762	-22.54127712	17.04018893	60401026	Khomasdal North	2	Male	20 - 24	0	0	0	0	0	0	Complete secondary	1	1	1	1	1	Urban	Urban	Urban	Urban
1763	-22.54125638	17.04003684	60401026	Khomasdal North	5	Female	30 - 34	0	0	0	0	1	1	Complete secondary	1	1	1	1	1	Urban	Urban	Urban	Urban
1764	-22.5412702	17.03991932	60401026	Khomasdal North	5	Female	50 - 54	0	0	0	0	0	0	Complete primary	1	1	1	1	1	Urban	Urban	Urban	Urban
1765	-22.5412702	17.03975341	60401026	Khomasdal North	1	Female	45 - 49	0	0	0	0	0	0	Complete primary	1	1	1	1	1	Urban	Urban	Urban	Urban
1766	-22.5412702	17.03960823	60401026	Khomasdal North	6	Male	50 - 54	0	1	0	0	0	1	No formal	1	1	1	1	1	Urban	Urban	Urban	Urban
1767	-22.5412702	17.03946306	60401026	Khomasdal North	10	Male	35 - 39	0	0	0	0	0	1	Complete secondary	1	1	1	1	1	Urban	Urban	Urban	Urban
1768	-22.54127712	17.03935245	60401026	Khomasdal North	3	Female	20 - 24	0	0	0	0	0	0	Complete primary	1	1	1	1	1	Urban	Urban	Urban	Urban
1769	-22.54127712	17.03913814	60401026	Khomasdal North	4	Female	35 - 39	0	0	0	0	1	1	Complete tertiary	1	1	1	1	1	Urban	Urban	Urban	Urban
1770	-22.54127712	17.0390137	60401026	Khomasdal North	6	Female	45 - 49	0	0	0	0	0	0	Complete secondary	1	1	1	1	1	Urban	Urban	Urban	Urban
1771	-22.54127712	17.03893074	60401026	Khomasdal North	5	Male	35 - 39	0	0	1	0	0	0	Complete primary	1	1	1	1	1	Urban	Urban	Urban	Urban
1772	-22.54129094	17.03878557	60401026	Khomasdal North	16	Female	35 - 39	0	0	0	0	1	0	Incomplete primary	1	1	1	1	1	Urban	Urban	Urban	Urban
1773	-22.5412149	17.03876483	60401026	Khomasdal North	7	Female	55 - 59	0	0	0	0	1	0	Complete primary	1	1	1	1	1	Urban	Urban	Urban	Urban
1774	-22.54120798	17.03857126	60401026	Khomasdal North	2	Female	35 - 39	0	0	1	0	0	0	Complete secondary	1	1	1	1	1	Urban	Urban	Urban	Urban
1775	-22.54153981	17.03857126	60401026	Khomasdal North	1	Female	55 - 59	0	0	0	0	0	0	Complete secondary	1	1	1	1	0	Urban	Urban	Urban	Urban
1776	-22.54158821	17.03870952	60401026	Khomasdal North	6	Female	40 - 44	0	0	0	0	0	1	Complete primary	1	1	1	1	1	Urban	Urban	Urban	Urban
1777	-22.54156747	17.03884087	60401026	Khomasdal North	3	Male	30 - 34	0	0	0	0	0	0	Complete primary	1	1	1	1	1	Urban	Urban	Urban	Urban
1778	-22.54156747	17.03899988	60401026	Khomasdal North	7	Male	35 - 39	0	0	0	0	0	0	Complete secondary	1	1	1	1	1	Urban	Urban	Urban	Urban
1779	-22.54158821	17.03909666	60401026	Khomasdal North	1	Male	30 - 34	0	0	1	0	0	0	Complete primary	1	1	1	1	0	Urban	Urban	Urban	Urban
1780	-22.54159512	17.03926949	60401026	Khomasdal North	1	Male	20 - 24	0	0	1	0	0	0	Complete secondary	1	1	1	1	1	Urban	Urban	Urban	Urban
1781	-22.54159512	17.03939392	60401026	Khomasdal North	1	Male	35 - 39	0	0	1	0	0	0	Complete tertiary	1	1	1	1	1	Urban	Urban	Urban	Urban
1782	-22.54160203	17.03957367	60401026	Khomasdal North	1	Female	20 - 24	0	0	1	0	0	0	Complete primary	1	1	1	1	1	Urban	Urban	Urban	Urban
1783	-22.54160895	17.03967736	60401026	Khomasdal North	6	Male	45 - 49	0	0	0	0	1	0	No formal	1	1	1	1	0	Urban	Urban	Urban	Urban
1784	-22.54160895	17.03987093	60401026	Khomasdal North	4	Male	30 - 34	0	0	0	0	1	0	Complete primary	1	1	1	1	1	Urban	Urban	Urban	Urban
1785	-22.54160203	17.04000228	60401026	Khomasdal North	3	Male	45 - 49	0	0	0	0	0	0	Complete primary	1	1	1	1	1	Urban	Urban	Urban	Urban
1786	-22.54160203	17.04016128	60401026	Khomasdal North	3	Male	40 - 44	0	0	0	0	0	0	Complete primary	1	1	1	1	1	Urban	Urban	Urban	Urban
1787	-22.54158129	17.04028572	60401026	Khomasdal North	4	Male	35 - 39	0	0	0	0	1	1	Complete primary	1	1	1	1	1	Urban	Urban	Urban	Urban
1788	-22.54158129	17.04042398	60401026	Khomasdal North	6	Female	30 - 34	0	0	1	0	0	1	Complete primary	1	1	1	1	1	Urban	Urban	Urban	Urban
1789	-22.54158821	17.04056916	60401026	Khomasdal North	8	Female	50 - 54	0	0	1	0	1	1	Complete tertiary	1	1	1	1	1	Urban	Urban	Urban	Urban
1790	-22.54159512	17.04072124	60401026	Khomasdal North	7	Female	45 - 49	0	0	0	0	0	1	Complete primary	1	1	1	1	1	Urban	Urban	Urban	Urban
1791	-22.54171264	17.0405899	60401026	Khomasdal North	1	Female	40 - 44	0	0	0	0	0	0	Complete secondary	1	1	1	1	1	Urban	Urban	Urban	Urban
1792	-22.54178177	17.04044472	60401026	Khomasdal North	6	Male	30 - 34	0	0	0	0	0	1	Complete tertiary	1	1	1	1	1	Urban	Urban	Urban	Urban
1793	-22.54177486	17.04032028	60401026	Khomasdal North	3	Male	40 - 44	0	0	0	0	0	0	Complete primary	1	1	1	1	0	Urban	Urban	Urban	Urban
1794	-22.5417956	17.04017511	60401026	Khomasdal North	6	Male	35 - 39	0	0	0	0	0	0	Complete primary	1	1	1	1	1	Urban	Urban	Urban	Urban
1795	-22.5417956	17.03999537	60401026	Khomasdal North	6	Female	30 - 34	0	0	0	0	0	0	Complete secondary	1	1	1	1	1	Urban	Urban	Urban	Urban
1796	-22.5417956	17.03987784	60401026	Khomasdal North	10	Female	50 - 54	0	0	0	0	1	1	Incomplete primary	1	1	1	1	1	Urban	Urban	Urban	Urban
1797	-22.5417956	17.03973958	60401026	Khomasdal North	8	Male	40 - 44	0	0	0	0	0	1	Complete primary	1	1	1	1	0	Urban	Urban	Urban	Urban
1798	-22.5417956	17.03960823	60401026	Khomasdal North	7	Male	35 - 39	0	0	0	0	1	0	Complete secondary	1	1	1	1	1	Urban	Urban	Urban	Urban
1799	-22.5417956	17.03942158	60401026	Khomasdal North	12	Female	45 - 49	0	1	1	0	1	1	Complete tertiary	1	1	1	1	1	Urban	Urban	Urban	Urban
1800	-22.5417956	17.03928331	60401026	Khomasdal North	5	Male	45 - 49	0	1	0	0	0	0	Complete tertiary	1	1	1	1	1	Urban	Urban	Urban	Urban
1801	-22.5417956	17.03914505	60401026	Khomasdal North	4	Male	20 - 24	0	0	0	0	0	0	Complete secondary	1	1	1	1	1	Urban	Urban	Urban	Urban
1802	-22.5417956	17.0390137	60401026	Khomasdal North	3	Male	30 - 34	0	1	0	0	0	1	Complete secondary	1	1	1	1	1	Urban	Urban	Urban	Urban
1803	-22.5417956	17.03886853	60401026	Khomasdal North	2	Female	25 - 29	0	0	0	0	0	0	Complete secondary	1	1	1	1	1	Urban	Urban	Urban	Urban
1804	-22.5417956	17.03865422	60401026	Khomasdal North	3	Male	25 - 29	0	0	1	0	0	0	Complete tertiary	1	1	1	1	1	Urban	Urban	Urban	Urban
1805	-22.53931379	17.04081112	60401026	Khomasdal North	5	Female	50 - 54	0	0	0	0	0	1	No formal	1	1	1	0	0	Urban	Urban	Urban	Urban
1806	-22.53939674	17.04075581	60401026	Khomasdal North	10	Female	35 - 39	0	0	0	0	0	1	Complete primary	1	1	1	0	0	Urban	Urban	Urban	Urban
1807	-22.53951427	17.0407489	60401026	Khomasdal North	2	Female	35 - 39	0	0	0	0	0	0	Complete primary	1	1	1	0	0	Urban	Urban	Urban	Urban
1808	-22.53959031	17.04070051	60401026	Khomasdal North	6	Male	40 - 44	0	0	0	0	0	0	Complete secondary	1	1	1	0	0	Urban	Urban	Urban	Urban
1809	-22.53967327	17.04071433	60401026	Khomasdal North	5	Male	45 - 49	0	0	0	0	0	1	Complete secondary	1	1	1	0	0	Urban	Urban	Urban	Urban
1810	-22.53977005	17.04071433	60401026	Khomasdal North	6	Male	45 - 49	0	0	0	0	0	1	Complete primary	1	1	1	0	0	Urban	Urban	Urban	Urban
1811	-22.53988758	17.04071433	60401026	Khomasdal North	5	Female	20 - 24	0	0	0	0	0	1	Complete primary	1	1	1	0	0	Urban	Urban	Urban	Urban
1812	-22.53927922	17.04060372	60401026	Khomasdal North	8	Female	55 - 59	0	0	0	0	1	1	No formal	1	1	1	0	0	Urban	Urban	Urban	Urban
1813	-22.53936909	17.04057607	60401026	Khomasdal North	5	Male	45 - 49	0	0	0	0	0	0	Incomplete primary	1	1	1	0	0	Urban	Urban	Urban	Urban
1814	-22.53944514	17.04053459	60401026	Khomasdal North	5	Male	25 - 29	0	0	0	0	1	0	Complete primary	1	1	1	0	0	Urban	Urban	Urban	Urban
1815	-22.53952809	17.0404862	60401026	Khomasdal North	4	Male	45 - 49	0	0	0	0	0	0	Complete tertiary	1	1	1	0	0	Urban	Urban	Urban	Urban
1816	-22.53963179	17.04031337	60401026	Khomasdal North	2	Female	Oct-14	1	0	0	0	0	0	Complete primary	1	1	1	0	0	Urban	Urban	Urban	Urban
1817	-22.53966636	17.04037559	60401026	Khomasdal North	9	Female	40 - 44	0	0	0	0	1	1	Complete primary	1	1	1	0	0	Urban	Urban	Urban	Urban
1818	-22.53972166	17.04045163	60401026	Khomasdal North	4	Male	50 - 54	0	0	0	0	0	0	Complete tertiary	1	1	1	0	0	Urban	Urban	Urban	Urban
1819	-22.53976314	17.04052076	60401026	Khomasdal North	10	Female	35 - 39	0	0	0	0	1	1	Incomplete primary	1	1	1	0	0	Urban	Urban	Urban	Urban
1820	-22.53922392	17.04050694	60401026	Khomasdal North	3	Male	20 - 24	0	0	0	0	0	0	Incomplete primary	1	1	1	0	0	Urban	Urban	Urban	Urban
1821	-22.53922392	17.04050694	60401026	Khomasdal North	4	Male	25 - 29	0	0	0	0	0	1	Complete secondary	1	1	1	0	0	Urban	Urban	Urban	Urban
1822	-22.53936218	17.04044472	60401026	Khomasdal North	6	Female	35 - 39	0	0	0	0	1	0	Complete primary	1	1	1	0	0	Urban	Urban	Urban	Urban
1823	-22.53943822	17.04042398	60401026	Khomasdal North	4	Female	40 - 44	0	0	0	0	0	0	Complete tertiary	1	1	1	0	0	Urban	Urban	Urban	Urban
1824	-22.53943822	17.04042398	60401026	Khomasdal North	1	Female	20 - 24	0	0	0	0	0	0	Complete tertiary	1	1	1	0	0	Urban	Urban	Urban	Urban
1825	-22.53912022	17.0403272	60401026	Khomasdal North	4	Female	25 - 29	0	0	0	0	0	1	Complete primary	1	1	1	0	0	Urban	Urban	Urban	Urban
1826	-22.53922392	17.04030646	60401026	Khomasdal North	5	Male	40 - 44	0	0	0	0	0	1	Complete secondary	1	1	1	0	0	Urban	Urban	Urban	Urban
1827	-22.53931379	17.0402788	60401026	Khomasdal North	3	Male	35 - 39	0	0	0	0	0	1	Complete primary	1	1	1	0	0	Urban	Urban	Urban	Urban
1828	-22.53939674	17.04026498	60401026	Khomasdal North	5	Male	45 - 49	0	0	0	0	1	0	Complete tertiary	1	1	1	0	0	Urban	Urban	Urban	Urban
1829	-22.53950044	17.04023041	60401026	Khomasdal North	5	Female	45 - 49	0	0	0	0	0	0	Complete secondary	1	1	1	0	0	Urban	Urban	Urban	Urban
1830	-22.53969401	17.04002993	60401026	Khomasdal North	1	Male	20 - 24	0	0	1	0	0	0	Complete secondary	1	1	1	1	1	Urban	Urban	Urban	Urban
1831	-22.5388045	17.04281181	60401027	Khomasdal North	2	Female	25 - 29	0	0	1	0	0	0	Complete tertiary	1	1	1	1	0	Urban	Urban	Urban	Urban
1832	-22.53890182	17.0427253	60401027	Khomasdal North	12	Female	35 - 39	0	0	0	0	1	1	Complete primary	1	1	1	1	1	Urban	Urban	Urban	Urban
1833	-22.53899915	17.04266042	60401027	Khomasdal North	7	Male	40 - 44	0	1	0	0	1	1	No formal	1	1	1	1	0	Urban	Urban	Urban	Urban
1834	-22.53909647	17.04262798	60401027	Khomasdal North	2	Male	20 - 24	0	0	1	0	0	0	Complete primary	1	1	1	1	1	Urban	Urban	Urban	Urban
1835	-22.53924245	17.04251984	60401027	Khomasdal North	4	Female	35 - 39	0	0	0	0	0	1	Complete primary	1	1	1	1	1	Urban	Urban	Urban	Urban
1836	-22.539356	17.04246037	60401027	Khomasdal North	1	Male	20 - 24	0	0	0	0	0	0	Complete secondary	1	1	1	1	1	Urban	Urban	Urban	Urban
1837	-22.53948576	17.04243874	60401027	Khomasdal North	7	Male	40 - 44	0	0	0	0	0	1	Complete tertiary	1	1	1	1	1	Urban	Urban	Urban	Urban
1838	-22.53958849	17.0423306	60401027	Khomasdal North	1	Female	30 - 34	0	0	0	0	0	0	Complete primary	1	1	1	1	1	Urban	Urban	Urban	Urban
1839	-22.53973447	17.04226572	60401027	Khomasdal North	6	Male	20 - 24	0	0	0	0	0	0	Complete primary	1	1	1	1	1	Urban	Urban	Urban	Urban
1840	-22.5399129	17.04223328	60401027	Khomasdal North	6	Female	35 - 39	0	0	0	0	0	1	Incomplete primary	1	1	1	1	1	Urban	Urban	Urban	Urban
1841	-22.53999941	17.04213596	60401027	Khomasdal North	3	Male	25 - 29	0	0	0	0	0	0	Complete secondary	1	1	1	1	0	Urban	Urban	Urban	Urban
1842	-22.54012917	17.04210352	60401027	Khomasdal North	5	Female	45 - 49	0	0	1	0	0	0	Complete primary	1	1	1	1	1	Urban	Urban	Urban	Urban
1843	-22.5402319	17.04207108	60401027	Khomasdal North	5	Male	60 - 64	0	0	0	0	0	0	Complete primary	1	1	1	1	1	Urban	Urban	Urban	Urban
1844	-22.54036707	17.04202782	60401027	Khomasdal North	8	Male	30 - 34	0	0	0	0	0	1	Complete tertiary	1	1	1	1	1	Urban	Urban	Urban	Urban
1845	-22.54048602	17.04192509	60401027	Khomasdal North	2	Female	15 - 19	0	0	0	0	0	0	Complete primary	1	1	1	1	0	Urban	Urban	Urban	Urban
1846	-22.54059416	17.04187102	60401027	Khomasdal North	6	Female	30 - 34	0	0	0	0	0	0	Complete primary	1	1	1	1	0	Urban	Urban	Urban	Urban
1847	-22.54072392	17.04182777	60401027	Khomasdal North	5	Female	45 - 49	0	0	0	0	0	0	No formal	1	1	1	1	1	Urban	Urban	Urban	Urban
1848	-22.54132948	17.04175748	60401027	Khomasdal North	3	Female	55 - 59	0	0	0	0	0	0	Incomplete primary	1	1	1	1	1	Urban	Urban	Urban	Urban
1849	-22.54147006	17.04177911	60401027	Khomasdal North	6	Male	50 - 54	0	0	0	0	0	1	Incomplete primary	1	1	1	1	1	Urban	Urban	Urban	Urban
1850	-22.54162686	17.04180614	60401027	Khomasdal North	4	Male	45 - 49	0	0	0	0	1	0	Incomplete primary	1	1	1	1	1	Urban	Urban	Urban	Urban
1851	-22.54178365	17.04187102	60401027	Khomasdal North	1	Female	35 - 39	0	0	0	0	0	0	Complete primary	1	1	1	1	0	Urban	Urban	Urban	Urban
1852	-22.54195127	17.04196835	60401027	Khomasdal North	5	Male	50 - 54	0	0	0	0	0	0	Complete secondary	1	1	1	1	1	Urban	Urban	Urban	Urban
1853	-22.54206481	17.04204404	60401027	Khomasdal North	3	Male	35 - 39	0	0	1	0	0	0	Complete primary	1	1	1	1	1	Urban	Urban	Urban	Urban
1854	-22.54221079	17.04198997	60401027	Khomasdal North	2	Male	50 - 54	0	0	0	0	0	0	Complete primary	1	1	1	1	1	Urban	Urban	Urban	Urban
1855	-22.54231893	17.04214137	60401027	Khomasdal North	4	Female	25 - 29	0	0	0	0	0	1	Complete primary	1	1	1	0	0	Urban	Urban	Urban	Urban
1856	-22.54242166	17.04219543	60401027	Khomasdal North	5	Male	45 - 49	0	0	0	0	0	1	Incomplete primary	1	1	1	0	0	Urban	Urban	Urban	Urban
1857	-22.54256764	17.04223869	60401027	Khomasdal North	1	Female	45 - 49	0	0	0	0	0	0	Complete tertiary	1	1	1	1	1	Urban	Urban	Urban	Urban
1858	-22.54268119	17.04227654	60401027	Khomasdal North	7	Female	25 - 29	0	0	0	0	0	1	Complete secondary	1	1	1	1	1	Urban	Urban	Urban	Urban
1859	-22.54283258	17.04230898	60401027	Khomasdal North	2	Male	20 - 24	0	0	0	0	0	0	Complete secondary	1	1	1	1	0	Urban	Urban	Urban	Urban
1860	-22.54293531	17.04234682	60401027	Khomasdal North	8	Female	35 - 39	0	0	1	0	1	1	Complete tertiary	1	1	1	1	1	Urban	Urban	Urban	Urban
1861	-22.54306507	17.04238467	60401027	Khomasdal North	5	Male	45 - 49	0	0	0	0	0	0	Complete primary	1	1	1	1	1	Urban	Urban	Urban	Urban
1862	-22.54323809	17.04240089	60401027	Khomasdal North	5	Male	30 - 34	0	0	0	0	0	1	Complete secondary	1	1	1	0	0	Urban	Urban	Urban	Urban
1863	-22.54336785	17.04248199	60401027	Khomasdal North	2	Female	25 - 29	0	0	0	0	0	0	Complete tertiary	1	1	1	1	1	Urban	Urban	Urban	Urban
1864	-22.54350843	17.04251984	60401027	Khomasdal North	7	Male	45 - 49	0	0	0	0	1	1	Complete primary	1	1	1	1	1	Urban	Urban	Urban	Urban
1865	-22.54361656	17.04257932	60401027	Khomasdal North	10	Male	60 - 64	0	1	0	0	0	0	Complete tertiary	1	1	1	1	1	Urban	Urban	Urban	Urban
1866	-22.539994	17.04646141	60401027	Khomasdal North	6	Female	35 - 39	0	0	1	0	1	0	Complete primary	1	1	1	1	1	Urban	Urban	Urban	Urban
1867	-22.54012376	17.04641815	60401027	Khomasdal North	3	Female	25 - 29	0	0	0	0	0	1	Complete tertiary	1	1	1	1	1	Urban	Urban	Urban	Urban
1868	-22.54020487	17.04633705	60401027	Khomasdal North	1	Male	20 - 24	0	0	0	0	0	0	Complete secondary	1	1	1	1	1	Urban	Urban	Urban	Urban
1869	-22.54034544	17.04627758	60401027	Khomasdal North	15	Male	50 - 54	0	0	0	0	1	1	Complete primary	1	1	1	1	0	Urban	Urban	Urban	Urban
1870	-22.54048602	17.04616403	60401027	Khomasdal North	6	Male	45 - 49	0	0	0	0	0	0	Complete secondary	1	1	1	1	1	Urban	Urban	Urban	Urban
1871	-22.54056171	17.046137	60401027	Khomasdal North	9	Male	45 - 49	0	0	1	0	0	1	Complete primary	1	1	1	1	1	Urban	Urban	Urban	Urban
1872	-22.54090775	17.04598561	60401027	Khomasdal North	1	Male	35 - 39	0	1	0	0	0	0	Complete tertiary	1	1	1	1	1	Urban	Urban	Urban	Urban
1873	-22.54104833	17.04599642	60401027	Khomasdal North	5	Male	35 - 39	0	0	1	0	0	1	Incomplete primary	1	1	1	1	1	Urban	Urban	Urban	Urban
1874	-22.54117268	17.04598561	60401027	Khomasdal North	14	Male	60 - 64	0	0	0	0	0	0	Complete primary	1	1	1	1	1	Urban	Urban	Urban	Urban
1875	-22.54130785	17.04602346	60401027	Khomasdal North	3	Male	45 - 49	0	0	0	0	0	0	Complete tertiary	1	1	1	1	1	Urban	Urban	Urban	Urban
1876	-22.54145384	17.04603968	60401027	Khomasdal North	2	Male	30 - 34	0	0	0	0	0	0	Complete secondary	1	1	1	1	1	Urban	Urban	Urban	Urban
1877	-22.54158901	17.04604508	60401027	Khomasdal North	4	Male	30 - 34	0	0	0	0	1	1	Complete tertiary	1	1	1	1	1	Urban	Urban	Urban	Urban
1878	-22.54170796	17.0460613	60401027	Khomasdal North	16	Female	65 - 74	0	0	0	0	1	1	Incomplete primary	1	1	1	1	1	Urban	Urban	Urban	Urban
1879	-22.54187016	17.04603968	60401027	Khomasdal North	6	Female	40 - 44	0	0	1	0	0	1	Complete tertiary	1	1	1	1	1	Urban	Urban	Urban	Urban
1880	-22.54198371	17.04609374	60401027	Khomasdal North	3	Male	30 - 34	0	0	0	0	0	1	Complete secondary	1	1	1	1	0	Urban	Urban	Urban	Urban
1881	-22.54214591	17.04606671	60401027	Khomasdal North	1	Male	20 - 24	0	0	0	0	0	0	Complete secondary	1	1	1	1	1	Urban	Urban	Urban	Urban
1882	-22.54021027	17.04680744	60401027	Khomasdal North	3	Female	40 - 44	0	0	0	0	0	0	No formal	1	1	1	1	1	Urban	Urban	Urban	Urban
1883	-22.54025353	17.04691017	60401027	Khomasdal North	4	Male	30 - 34	0	0	0	0	0	0	Complete secondary	1	1	1	1	0	Urban	Urban	Urban	Urban
1884	-22.54032922	17.04703453	60401027	Khomasdal North	6	Male	55 - 59	0	0	0	0	0	0	Complete primary	1	1	1	1	1	Urban	Urban	Urban	Urban
1885	-22.5403941	17.0471697	60401027	Khomasdal North	7	Male	20 - 24	0	0	0	0	1	0	Complete secondary	1	1	1	1	1	Urban	Urban	Urban	Urban
1886	-22.54046439	17.04727784	60401027	Khomasdal North	3	Male	40 - 44	0	0	0	0	0	0	Complete tertiary	1	1	1	1	1	Urban	Urban	Urban	Urban
1887	-22.54052927	17.04741301	60401027	Khomasdal North	4	Female	40 - 44	0	0	1	0	0	0	Complete primary	1	1	1	1	0	Urban	Urban	Urban	Urban
1888	-22.54056712	17.04759684	60401027	Khomasdal North	2	Female	30 - 34	0	0	1	0	0	0	Complete primary	1	1	1	1	1	Urban	Urban	Urban	Urban
1889	-22.54068607	17.04766713	60401027	Khomasdal North	3	Female	20 - 24	0	0	0	0	0	0	Complete tertiary	1	1	1	1	1	Urban	Urban	Urban	Urban
1890	-22.54074555	17.04779148	60401027	Khomasdal North	9	Female	55 - 59	0	0	0	0	0	1	Complete primary	1	1	1	1	1	Urban	Urban	Urban	Urban
1891	-22.54084287	17.0478834	60401027	Khomasdal North	4	Male	25 - 29	0	0	0	0	0	1	Complete tertiary	1	1	1	1	1	Urban	Urban	Urban	Urban
1892	-22.54050224	17.0466128	60401027	Khomasdal North	3	Female	50 - 54	0	0	0	0	0	0	Complete tertiary	1	1	1	1	1	Urban	Urban	Urban	Urban
1893	-22.54061578	17.04671012	60401027	Khomasdal North	4	Male	35 - 39	0	0	0	0	0	0	Complete tertiary	1	1	1	1	1	Urban	Urban	Urban	Urban
1894	-22.54062119	17.04682907	60401027	Khomasdal North	5	Male	60 - 64	0	0	0	0	0	0	Complete primary	1	1	1	1	1	Urban	Urban	Urban	Urban
1895	-22.54070229	17.04696424	60401027	Khomasdal North	3	Female	25 - 29	0	0	0	0	0	1	Complete tertiary	1	1	1	1	1	Urban	Urban	Urban	Urban
1896	-22.54076717	17.04711023	60401027	Khomasdal North	5	Male	40 - 44	0	0	0	0	0	0	Complete primary	1	1	1	1	1	Urban	Urban	Urban	Urban
1897	-22.54082124	17.04725621	60401027	Khomasdal North	7	Female	25 - 29	0	0	0	0	1	1	Complete tertiary	1	1	1	1	1	Urban	Urban	Urban	Urban
1898	-22.54088612	17.04732109	60401027	Khomasdal North	6	Female	75+	0	0	0	0	1	0	Incomplete primary	1	1	1	1	0	Urban	Urban	Urban	Urban
1899	-22.54095641	17.04750492	60401027	Khomasdal North	2	Male	25 - 29	0	0	0	0	0	0	Complete secondary	1	1	1	1	1	Urban	Urban	Urban	Urban
1900	-22.54105914	17.04767253	60401027	Khomasdal North	7	Male	50 - 54	0	0	0	0	0	0	Incomplete primary	1	1	1	1	1	Urban	Urban	Urban	Urban
1901	-22.54112402	17.04774823	60401027	Khomasdal North	4	Male	35 - 39	0	0	0	0	0	0	Complete tertiary	1	1	1	1	1	Urban	Urban	Urban	Urban
1902	-22.54082124	17.04639653	60401027	Khomasdal North	7	Male	50 - 54	0	0	0	0	0	0	No formal	1	1	1	1	1	Urban	Urban	Urban	Urban
1903	-22.5408645	17.04657495	60401027	Khomasdal North	6	Male	30 - 34	0	1	0	0	0	1	Complete secondary	1	1	1	1	1	Urban	Urban	Urban	Urban
1904	-22.54101048	17.04668309	60401027	Khomasdal North	9	Female	20 - 24	0	0	1	0	0	1	Complete secondary	1	1	1	1	1	Urban	Urban	Urban	Urban
1905	-22.5410267	17.04678041	60401027	Khomasdal North	1	Female	20 - 24	0	0	1	0	0	0	Complete tertiary	1	1	1	1	0	Urban	Urban	Urban	Urban
1906	-22.54116728	17.04686692	60401027	Khomasdal North	1	Female	35 - 39	0	0	0	0	0	0	Complete primary	1	1	1	1	1	Urban	Urban	Urban	Urban
1907	-22.54131867	17.04673716	60401027	Khomasdal North	4	Female	65 - 74	0	0	0	0	0	0	Complete primary	1	1	1	1	0	Urban	Urban	Urban	Urban
1908	-22.54148087	17.04674256	60401027	Khomasdal North	5	Male	35 - 39	0	0	0	0	0	1	Complete tertiary	1	1	1	1	1	Urban	Urban	Urban	Urban
1909	-22.5414214	17.04656414	60401027	Khomasdal North	5	Female	60 - 64	0	0	0	0	0	1	No formal	1	1	1	1	1	Urban	Urban	Urban	Urban
1910	-22.54125919	17.04650466	60401027	Khomasdal North	1	Male	50 - 54	0	0	0	0	0	0	Complete secondary	1	1	1	1	1	Urban	Urban	Urban	Urban
1911	-22.54112402	17.04643978	60401027	Khomasdal North	1	Male	15 - 19	0	0	0	0	0	0	Complete primary	1	1	1	1	1	Urban	Urban	Urban	Urban
1912	-22.54124297	17.04726162	60401027	Khomasdal North	6	Male	40 - 44	0	0	0	0	0	0	Complete primary	1	1	1	1	1	Urban	Urban	Urban	Urban
1913	-22.54137814	17.04719673	60401027	Khomasdal North	6	Male	35 - 39	0	0	0	0	0	0	Complete primary	1	1	1	1	0	Urban	Urban	Urban	Urban
1914	-22.54150791	17.04712645	60401027	Khomasdal North	2	Male	30 - 34	0	0	0	0	0	0	Complete primary	1	1	1	1	1	Urban	Urban	Urban	Urban
1915	-22.54165389	17.04707778	60401027	Khomasdal North	2	Female	45 - 49	0	0	0	0	0	0	Complete secondary	1	1	1	1	1	Urban	Urban	Urban	Urban
1916	-22.54175121	17.04701831	60401027	Khomasdal North	7	Female	60 - 64	0	0	0	0	1	1	Complete primary	1	1	1	1	1	Urban	Urban	Urban	Urban
1917	-22.54141599	17.04750492	60401027	Khomasdal North	2	Male	35 - 39	0	0	0	0	0	0	Complete primary	1	1	1	1	1	Urban	Urban	Urban	Urban
1918	-22.54150791	17.04749952	60401027	Khomasdal North	4	Female	25 - 29	0	0	0	0	0	1	Complete secondary	1	1	1	1	1	Urban	Urban	Urban	Urban
1919	-22.54165389	17.04744545	60401027	Khomasdal North	6	Female	25 - 29	0	0	0	0	1	0	Complete secondary	1	1	1	1	1	Urban	Urban	Urban	Urban
1920	-22.54178906	17.04741841	60401027	Khomasdal North	2	Female	60 - 64	0	0	0	0	0	0	Complete primary	1	1	1	1	1	Urban	Urban	Urban	Urban
1921	-22.54187016	17.04735894	60401027	Khomasdal North	3	Male	40 - 44	0	0	0	0	0	0	Complete tertiary	1	1	1	1	1	Urban	Urban	Urban	Urban
1922	-22.54201074	17.04729946	60401027	Khomasdal North	6	Male	50 - 54	0	0	0	0	0	1	Complete primary	1	1	1	1	1	Urban	Urban	Urban	Urban
1923	-22.54212428	17.04706697	60401027	Khomasdal North	4	Male	25 - 29	0	0	0	0	1	1	Complete tertiary	1	1	1	1	0	Urban	Urban	Urban	Urban
1924	-22.54214591	17.04690477	60401027	Khomasdal North	2	Female	25 - 29	0	0	0	0	0	0	Complete tertiary	1	1	1	1	1	Urban	Urban	Urban	Urban
1925	-22.54192423	17.04691558	60401027	Khomasdal North	2	Female	50 - 54	0	0	0	0	0	0	No formal	1	1	1	1	1	Urban	Urban	Urban	Urban
1926	-22.54185935	17.04673175	60401027	Khomasdal North	2	Male	40 - 44	0	0	1	0	0	0	Complete primary	1	1	1	1	1	Urban	Urban	Urban	Urban
1927	-22.54185394	17.04659658	60401027	Khomasdal North	8	Male	30 - 34	0	0	0	0	0	1	Complete primary	1	1	1	1	1	Urban	Urban	Urban	Urban
1928	-22.54187016	17.04640734	60401027	Khomasdal North	1	Male	30 - 34	0	0	0	0	0	0	Incomplete primary	1	1	1	1	0	Urban	Urban	Urban	Urban
1929	-22.54216213	17.04644519	60401027	Khomasdal North	4	Female	25 - 29	0	0	1	0	0	1	Complete tertiary	1	1	1	1	1	Urban	Urban	Urban	Urban
1930	-22.54216213	17.04660739	60401027	Khomasdal North	7	Female	60 - 64	0	0	1	0	1	0	Incomplete primary	1	1	1	1	1	Urban	Urban	Urban	Urban
1931	-22.54216754	17.04674256	60401027	Khomasdal North	1	Male	35 - 39	0	0	1	0	0	0	Complete secondary	1	1	1	1	0	Urban	Urban	Urban	Urban
1932	-22.54256764	17.04644519	60401028	Khomasdal North	1	Male	50 - 54	0	0	0	0	0	0	Complete tertiary	1	1	1	1	1	Urban	Urban	Urban	Urban
1933	-22.54254601	17.04660739	60401028	Khomasdal North	2	Female	50 - 54	0	0	0	0	0	0	Complete primary	1	1	1	1	1	Urban	Urban	Urban	Urban
1934	-22.54252439	17.04680204	60401028	Khomasdal North	3	Female	60 - 64	0	0	0	0	0	1	Complete primary	1	1	1	1	1	Urban	Urban	Urban	Urban
1935	-22.54251357	17.04698046	60401028	Khomasdal North	5	Male	35 - 39	0	0	1	0	0	1	Complete secondary	1	1	1	1	1	Urban	Urban	Urban	Urban
1936	-22.54252439	17.04705616	60401028	Khomasdal North	3	Female	25 - 29	0	0	1	0	0	0	Complete primary	1	1	1	1	1	Urban	Urban	Urban	Urban
1937	-22.54251898	17.04714267	60401028	Khomasdal North	8	Male	55 - 59	0	0	0	0	0	0	Complete primary	1	1	1	1	1	Urban	Urban	Urban	Urban
1938	-22.54252439	17.04731568	60401028	Khomasdal North	6	Female	60 - 64	0	0	0	0	0	1	Incomplete primary	1	1	1	1	1	Urban	Urban	Urban	Urban
1939	-22.54238381	17.04754818	60401028	Khomasdal North	1	Male	35 - 39	0	0	1	0	0	0	Complete secondary	1	1	1	1	1	Urban	Urban	Urban	Urban
1940	-22.54223242	17.04754277	60401028	Khomasdal North	3	Female	30 - 34	0	0	0	0	0	0	Complete secondary	1	1	1	1	1	Urban	Urban	Urban	Urban
1941	-22.54212428	17.04762387	60401028	Khomasdal North	3	Female	30 - 34	0	0	0	0	0	0	Complete primary	1	1	1	1	0	Urban	Urban	Urban	Urban
1942	-22.54198911	17.04768335	60401028	Khomasdal North	2	Male	40 - 44	0	0	0	0	0	0	Complete primary	1	1	1	1	1	Urban	Urban	Urban	Urban
1943	-22.54182691	17.04774282	60401028	Khomasdal North	5	Female	35 - 39	0	0	0	0	0	0	Complete primary	1	1	1	1	1	Urban	Urban	Urban	Urban
1944	-22.54172418	17.04779148	60401028	Khomasdal North	7	Female	45 - 49	0	0	0	0	0	0	Complete tertiary	1	1	1	1	1	Urban	Urban	Urban	Urban
1945	-22.54162686	17.04786177	60401028	Khomasdal North	2	Male	35 - 39	0	0	1	0	0	0	Complete tertiary	1	1	1	1	1	Urban	Urban	Urban	Urban
1946	-22.54171337	17.04812671	60401028	Khomasdal North	1	Male	20 - 24	0	0	1	0	0	0	Complete secondary	1	1	1	1	0	Urban	Urban	Urban	Urban
1947	-22.54183232	17.04814833	60401028	Khomasdal North	3	Male	40 - 44	0	0	0	0	0	0	Complete tertiary	1	1	1	1	1	Urban	Urban	Urban	Urban
1948	-22.5419783	17.04811049	60401028	Khomasdal North	2	Male	30 - 34	0	0	0	0	0	0	Complete secondary	1	1	1	1	1	Urban	Urban	Urban	Urban
1949	-22.54210806	17.04803479	60401028	Khomasdal North	1	Male	35 - 39	0	0	1	0	0	0	Complete primary	1	1	1	1	1	Urban	Urban	Urban	Urban
1950	-22.54225945	17.04794287	60401028	Khomasdal North	5	Female	30 - 34	0	0	0	0	0	1	Incomplete primary	1	1	1	1	1	Urban	Urban	Urban	Urban
1951	-22.5423784	17.04791043	60401028	Khomasdal North	3	Female	30 - 34	0	0	0	0	0	0	Complete tertiary	1	1	1	1	1	Urban	Urban	Urban	Urban
1952	-22.54247032	17.04786718	60401028	Khomasdal North	2	Male	20 - 24	0	0	0	0	0	0	Complete secondary	1	1	1	1	1	Urban	Urban	Urban	Urban
1953	-22.54262712	17.04776445	60401028	Khomasdal North	4	Female	15 - 19	0	0	0	0	0	0	Complete primary	1	1	1	1	0	Urban	Urban	Urban	Urban
1954	-22.54272985	17.04776445	60401028	Khomasdal North	5	Female	35 - 39	0	0	0	0	1	1	Complete primary	1	1	1	1	1	Urban	Urban	Urban	Urban
1955	-22.54282717	17.04750492	60401028	Khomasdal North	7	Male	45 - 49	0	0	0	0	1	0	Complete tertiary	1	1	1	1	0	Urban	Urban	Urban	Urban
1956	-22.54284339	17.04739679	60401028	Khomasdal North	4	Female	35 - 39	0	0	0	0	1	0	Complete tertiary	1	1	1	1	1	Urban	Urban	Urban	Urban
1957	-22.54285961	17.04725621	60401028	Khomasdal North	3	Female	30 - 34	0	0	0	0	0	0	Complete tertiary	1	1	1	1	1	Urban	Urban	Urban	Urban
1958	-22.54288664	17.047094	60401028	Khomasdal North	8	Female	75+	0	0	0	0	0	1	No formal	1	1	1	1	1	Urban	Urban	Urban	Urban
1959	-22.54288664	17.0469318	60401028	Khomasdal North	2	Male	25 - 29	0	1	0	0	0	0	Complete tertiary	1	1	1	1	1	Urban	Urban	Urban	Urban
1960	-22.54287583	17.0467696	60401028	Khomasdal North	1	Female	40 - 44	0	0	0	0	0	0	Complete primary	1	1	1	1	1	Urban	Urban	Urban	Urban
1961	-22.54287583	17.04668849	60401028	Khomasdal North	4	Male	35 - 39	0	0	0	0	0	1	Complete primary	1	1	1	1	1	Urban	Urban	Urban	Urban
1962	-22.54287583	17.04655332	60401028	Khomasdal North	2	Male	30 - 34	0	0	0	0	0	1	Complete primary	1	1	1	1	1	Urban	Urban	Urban	Urban
1963	-22.54322727	17.04651548	60401028	Khomasdal North	5	Female	40 - 44	0	0	1	0	0	1	Complete secondary	1	1	1	1	1	Urban	Urban	Urban	Urban
1964	-22.54322727	17.04665065	60401028	Khomasdal North	6	Female	40 - 44	0	0	0	0	1	0	Complete primary	1	1	1	1	0	Urban	Urban	Urban	Urban
1965	-22.54320565	17.04678041	60401028	Khomasdal North	4	Female	55 - 59	0	0	0	0	0	0	Complete tertiary	1	1	1	1	1	Urban	Urban	Urban	Urban
1966	-22.54320565	17.04694261	60401028	Khomasdal North	2	Male	50 - 54	0	0	0	0	0	0	Complete primary	1	1	1	1	1	Urban	Urban	Urban	Urban
1967	-22.54319483	17.04708319	60401028	Khomasdal North	4	Male	35 - 39	0	0	0	0	1	1	Complete secondary	1	1	1	1	1	Urban	Urban	Urban	Urban
1968	-22.54318943	17.04720755	60401028	Khomasdal North	4	Male	25 - 29	0	0	1	0	0	0	Complete secondary	1	1	1	1	1	Urban	Urban	Urban	Urban
1969	-22.54320024	17.04738057	60401028	Khomasdal North	3	Male	25 - 29	0	0	0	0	0	0	Complete secondary	1	1	1	1	1	Urban	Urban	Urban	Urban
1970	-22.54321646	17.04760765	60401028	Khomasdal North	5	Female	65 - 74	0	0	0	0	1	0	Complete tertiary	1	1	1	1	1	Urban	Urban	Urban	Urban
1971	-22.54318943	17.0477212	60401028	Khomasdal North	4	Male	45 - 49	0	0	0	0	0	0	Complete tertiary	1	1	1	1	0	Urban	Urban	Urban	Urban
1972	-22.54321105	17.04786718	60401028	Khomasdal North	3	Male	25 - 29	0	0	0	0	0	0	Complete primary	1	1	1	1	1	Urban	Urban	Urban	Urban
1973	-22.54350302	17.04655873	60401028	Khomasdal North	6	Male	40 - 44	0	0	0	0	0	1	Complete secondary	1	1	1	1	1	Urban	Urban	Urban	Urban
1974	-22.54351924	17.04664524	60401028	Khomasdal North	2	Female	30 - 34	0	0	0	0	0	0	Complete primary	1	1	1	1	1	Urban	Urban	Urban	Urban
1975	-22.54350302	17.04682366	60401028	Khomasdal North	2	Male	55 - 59	0	0	0	0	0	0	Complete primary	1	1	1	1	1	Urban	Urban	Urban	Urban
1976	-22.54350843	17.04693721	60401028	Khomasdal North	5	Female	25 - 29	0	0	0	0	1	0	Complete secondary	1	1	1	1	1	Urban	Urban	Urban	Urban
1977	-22.54357331	17.0470886	60401028	Khomasdal North	4	Male	35 - 39	0	0	0	0	0	0	Complete tertiary	1	1	1	1	1	Urban	Urban	Urban	Urban
1978	-22.5435679	17.04723999	60401028	Khomasdal North	8	Male	30 - 34	0	0	0	0	0	1	Complete tertiary	1	1	1	0	0	Urban	Urban	Urban	Urban
1979	-22.5435679	17.04744004	60401028	Khomasdal North	4	Male	25 - 29	0	0	0	0	0	0	Complete primary	1	1	1	1	0	Urban	Urban	Urban	Urban
1980	-22.5434868	17.04753196	60401028	Khomasdal North	5	Male	45 - 49	0	0	0	0	0	0	Complete primary	1	1	1	1	1	Urban	Urban	Urban	Urban
1981	-22.5434868	17.04767253	60401028	Khomasdal North	6	Male	35 - 39	0	0	0	0	0	1	Complete tertiary	1	1	1	1	1	Urban	Urban	Urban	Urban
1982	-22.54355709	17.04786177	60401028	Khomasdal North	4	Male	25 - 29	0	0	0	0	0	1	Complete primary	1	1	1	1	1	Urban	Urban	Urban	Urban
1983	-22.54355709	17.04796991	60401028	Khomasdal North	5	Female	35 - 39	0	0	0	0	0	1	Complete primary	1	1	1	1	1	Urban	Urban	Urban	Urban
1984	-22.54350302	17.04818077	60401028	Khomasdal North	3	Male	Oct-14	0	0	1	0	0	0	Complete primary	1	1	1	1	1	Urban	Urban	Urban	Urban
1985	-22.54335704	17.04825647	60401028	Khomasdal North	5	Female	35 - 39	0	0	0	0	0	1	Complete primary	1	1	1	1	1	Urban	Urban	Urban	Urban
1986	-22.54321646	17.04828891	60401028	Khomasdal North	5	Male	35 - 39	0	0	0	0	0	1	Complete primary	1	1	1	1	1	Urban	Urban	Urban	Urban
1987	-22.54309751	17.04834839	60401028	Khomasdal North	2	Male	30 - 34	0	0	0	0	0	0	Complete primary	1	1	1	1	1	Urban	Urban	Urban	Urban
1988	-22.54292449	17.04839705	60401028	Khomasdal North	5	Female	25 - 29	0	0	0	0	0	1	Complete tertiary	1	1	1	1	1	Urban	Urban	Urban	Urban
1989	-22.54282717	17.0484403	60401028	Khomasdal North	2	Male	30 - 34	0	0	0	0	0	0	Complete tertiary	1	1	1	1	0	Urban	Urban	Urban	Urban
1990	-22.54271363	17.04854303	60401028	Khomasdal North	6	Female	25 - 29	0	0	1	0	0	1	Complete secondary	1	1	1	1	1	Urban	Urban	Urban	Urban
1991	-22.54255683	17.04856466	60401028	Khomasdal North	4	Male	40 - 44	0	0	1	0	0	1	Complete tertiary	1	1	1	0	0	Urban	Urban	Urban	Urban
1992	-22.54243247	17.04860251	60401028	Khomasdal North	8	Male	30 - 34	0	0	0	0	0	1	Complete tertiary	1	1	1	1	1	Urban	Urban	Urban	Urban
1993	-22.54228108	17.04869983	60401028	Khomasdal North	1	Male	25 - 29	0	0	0	0	0	0	Complete primary	1	1	1	1	1	Urban	Urban	Urban	Urban
1994	-22.54219998	17.04872146	60401028	Khomasdal North	5	Male	35 - 39	0	0	0	0	0	1	Complete tertiary	1	1	1	1	1	Urban	Urban	Urban	Urban
1995	-22.54203777	17.04877552	60401028	Khomasdal North	2	Male	25 - 29	0	0	0	0	0	0	Complete tertiary	1	1	1	1	1	Urban	Urban	Urban	Urban
1996	-22.54307588	17.04802398	60401028	Khomasdal North	7	Male	40 - 44	0	0	1	0	0	1	Complete secondary	1	1	1	1	1	Urban	Urban	Urban	Urban
1997	-22.54291908	17.04805642	60401028	Khomasdal North	5	Female	40 - 44	0	0	0	0	0	0	Complete secondary	1	1	1	1	1	Urban	Urban	Urban	Urban
1998	-22.54277851	17.0481213	60401028	Khomasdal North	3	Male	35 - 39	0	0	0	0	0	0	Complete primary	1	1	1	1	1	Urban	Urban	Urban	Urban
1999	-22.54267037	17.04818618	60401028	Khomasdal North	2	Male	25 - 29	0	0	0	0	0	0	Complete secondary	1	1	1	1	1	Urban	Urban	Urban	Urban
[truncated: 95,668 more rows]
